# Supplementary material for: Design, synthesis, and biological evaluation of novel thiazole derivatives as PI3K/mTOR dual inhibitors
Source: Royal Society of Chemistry journal article supplement (doi:10.1039/d4md00462k), 2024-01-01
Supplement: d4md00462k1.pdf [file d4md00462k1.pdf]

## Supplementary data

### Design, synthesis, and biological evaluation of novel thiazole derivatives as PI3K/mTOR dual inhibitors

Samar I. Faggal<sup>1</sup>, Yara El-Dash<sup>1</sup>, Amr Sonousi<sup>1,2,\*</sup>, Amr M. Abdou<sup>3</sup>, Rasha A. Hassan<sup>1</sup>

<sup>1</sup> Pharmaceutical Organic Chemistry Department, Faculty of Pharmacy, Cairo University, Cairo 11562, Egypt

<sup>2</sup> University of Hertfordshire Hosted by Global Academic Foundation, New Administrative Capital, Cairo, Egypt

<sup>3</sup> Department of Microbiology and Immunology, National Research Centre, Dokki, Giza, 12622, Egypt

#### Correspondence to:

\* Dr. Amr Sonousi

Pharmaceutical Organic Chemistry Department, Faculty of Pharmacy,  
Cairo University, Cairo 11562, Egypt.

Address: Kasr El-Aini Street, Cairo, Egypt.

Email: [amr.motawi@pharma.cu.edu.eg](mailto:amr.motawi@pharma.cu.edu.eg)

ORCID: 0000-0002-7111-8837

## Supplementary data

### 1- Chemistry Experimental Section

#### 1.1 Chemistry procedures

Starting materials and solvents were acquired from commercial suppliers and were used without extra purification. Melting points were obtained on a Griffin apparatus and were uncorrected. Microanalyses for C, H, and N were carried out at the Regional Center for Mycology and Biotechnology, Faculty of Pharmacy, Al-Azhar University. IR spectra were recorded on Shimadzu IR 435 spectrophotometer (Shimadzu Corp., Kyoto, Japan) Faculty of Pharmacy, Cairo University, Cairo, Egypt and values were represented in  $\text{cm}^{-1}$ .  $^1\text{H}$  NMR spectra were carried out on Bruker 400 MHz (Bruker Corp., Billerica, MA, USA) spectrophotometer, Faculty of Pharmacy, Cairo University, Cairo, Egypt. The chemical shifts were recorded in ppm on  $\delta$  scale, coupling constants ( $J$ ) were given in Hz and peak multiplicities are designed as follows: s, singlet; d, doublet; dd, doublet of doublet; t, triplet; m, multiplet.  $^{13}\text{C}$  NMR spectra were carried out on Bruker 100 MHz spectrophotometer, Faculty of Pharmacy, Cairo University, Cairo, Egypt. Progress of the reactions were monitored by TLC using precoated aluminum sheet silica gel MERCK 60F 254 and was visualized by UV lamp.

#### 1.2 2-Ethoxy-4-((2-(4-phenylthiazol-2-yl)hydrazineylidene)methyl)phenol (3a)

Yellowish green solid: 75% yield; mp 182–184°C; IR (KBr,  $\text{cm}^{-1}$ ) 3313 (OH), 3336 (NH), 3062 (CH aromatic), 2927, 2881 (CH aliphatic), 1620 (C=N), 1581 (C=C);  $^1\text{H}$  NMR (400 MHz,  $\text{DMSO-}d_6$ )  $\delta$  11.81 (s, 1H, NH,  $\text{D}_2\text{O}$  exchangeable), 8.02 (s, 1H, CH=N), 7.85–7.83 (m, 1H, ArH), 7.45–7.38 (m, 2H, ArH), 7.34 (d,  $J = 7.2$  Hz, 2H, ArH), 7.31 (s, 1H, ArH thiazole), 7.25 (d,  $J = 1.6$  Hz, 1H, ArH), 7.10 (dd,  $J = 8.4, 1.6$  Hz, 1H, ArH), 6.87–6.82 (m, 1H, ArH), 5.73 (s, 1H, OH,  $\text{D}_2\text{O}$  exchangeable), 4.07 (q,  $J = 6.8$  Hz, 2H,  $\text{CH}_2\text{CH}_3$ ), 1.36 (t,  $J = 6.8$  Hz, 3H,  $\text{CH}_2\text{CH}_3$ );  $^{13}\text{C}$  NMR (100 MHz,  $\text{DMSO-}d_6$ )  $\delta$  166.5, 153.7, 147.7, 147.6, 135.6, 132.3, 129.9, 129.8, 129.1, 126.3, 121.6, 115.9, 112.4, 110.3, 64.3, 15.0. Anal. Calcd for  $\text{C}_{18}\text{H}_{17}\text{N}_3\text{O}_2\text{S}$  (339.41): C, 63.70; H, 5.05; N, 12.38, found C, 63.91; H, 5.22; N, 12.59.

#### 1.3 2-Ethoxy-4-((2-(4-(3-nitrophenyl)thiazol-2-yl)hydrazineylidene)methyl)phenol (3b)

Orange solid: 71% yield; mp 190–192°C; IR (KBr,  $\text{cm}^{-1}$ ) 3479 (OH), 3336 (NH), 3062 (CH aromatic), 2927, 2881 (CH aliphatic), 1616 (C=N), 1585 (C=C);  $^1\text{H}$  NMR (400 MHz,  $\text{DMSO-}d_6$ )  $\delta$  12.10 (s, 1H, NH,  $\text{D}_2\text{O}$  exchangeable), 8.66 (s, 1H, ArH), 8.29 (d,  $J = 8.0$  Hz, 1H, ArH), 8.14 (dd,  $J = 8.0, 1.6$  Hz, 1H, ArH), 7.95 (s, 1H, CH=N), 7.72–7.66 (m, 2H, ArH + OH,  $\text{D}_2\text{O}$  exchangeable), 7.61 (s, 1H, ArH thiazole), 7.23 (d,  $J = 1.6$  Hz, 1H, ArH), 7.07 (dd,  $J = 8.2, 1.6$  Hz, 1H, ArH), 6.85 (d,  $J = 8.0$  Hz, 1H, ArH), 4.07 (q,  $J = 6.8$  Hz, 2H,  $\text{CH}_2\text{CH}_3$ ), 1.37 (t,  $J = 6.8$  Hz, 3H,  $\text{CH}_2\text{CH}_3$ );  $^{13}\text{C}$  NMR (100 MHz,  $\text{DMSO-}d_6$ )  $\delta$  164.6, 153.7, 148.2, 148.1, 147.6, 147.1, 136.1, 131.4, 129.3, 129.1, 124.5, 122.3, 121.7, 115.9, 115.7, 113.0, 64.3, 15.0. Anal. Calcd for  $\text{C}_{18}\text{H}_{16}\text{N}_4\text{O}_4\text{S}$  (384.41): C, 56.24; H, 4.20; N, 14.58, found C, 56.41; H, 4.39; N, 14.81.

#### 1.4 2-(2-(4-Chloro-3-nitrobenzylidene)hydrazineyl)-4-phenylthiazole (3c)

Yellow solid: 71% yield; mp 238–240°C; IR (KBr,  $\text{cm}^{-1}$ ) 3367 (NH), 3059 (CH aromatic), 2970, 2873 (CH aliphatic), 1627 (C=N), 1608 (C=C);  $^1\text{H}$  NMR (400 MHz,  $\text{DMSO-}d_6$ )  $\delta$  12.55 (s, 1H, NH,  $\text{D}_2\text{O}$  exchangeable), 8.30 (d,  $J = 2.0$  Hz, 1H, ArH), 8.10 (s, 1H, CH=N), 7.98 (dd,  $J = 8.8, 2.0$  Hz, 1H, ArH), 7.88–7.86 (m, 2H, ArH), 7.83 (d,  $J = 8.4$  Hz, 1H, ArH), 7.43 (d,  $J = 7.2$  Hz, 2H, ArH), 7.40 (s, 1H, ArH thiazole), 7.32 (t,  $J = 7.2$  Hz, 1H, ArH);  $^{13}\text{C}$  NMR (100 MHz,  $\text{DMSO-}d_6$ )  $\delta$  168.2, 150.9, 148.4, 138.3, 135.6, 134.8, 132.6, 130.9, 129.1, 128.8, 128.3, 126.0, 123.2, 104.8. Anal. Calcd for  $\text{C}_{16}\text{H}_{11}\text{ClN}_4\text{O}_2\text{S}$  (358.80): C, 53.56; H, 3.09; N, 15.62, found C, 53.80; H, 3.27; N, 15.89.

### 1.5 2-(2-(4-Chloro-3-nitrobenzylidene)hydrazineyl)-4-(3-nitrophenyl)thiazole (3d)

Yellow solid: 76% yield; mp 236–238°C; IR (KBr,  $\text{cm}^{-1}$ ) 3410 (NH), 3086 (CH aromatic), 2920, 2866 (CH aliphatic), 1624 (C=N), 1570 (C=C);  $^1\text{H}$  NMR (400 MHz,  $\text{DMSO-}d_6$ )  $\delta$  12.65 (s, 1H, NH,  $\text{D}_2\text{O}$  exchangeable), 8.68 (t,  $J = 2.0$ , 1H, ArH), 8.31–8.30 (m, 2H, ArH), 8.16 (dd,  $J = 8.0, 1.6$  Hz, 1H, ArH), 8.10 (s, 1H, CH=N), 7.98 (dd,  $J = 8.4, 2.0$  Hz, 1H, ArH), 7.83 (d,  $J = 8.4$  Hz, 1H, ArH), 7.73 (s, 1H, ArH thiazole), 7.72 (t,  $J = 8.4$  Hz, 1H, ArH);  $^{13}\text{C}$  NMR (100 MHz,  $\text{DMSO-}d_6$ )  $\delta$  168.6, 148.7, 148.6, 148.3, 138.5, 136.4, 135.4, 132.6, 132.0, 131.0, 130.7, 125.2, 123.2, 122.5, 120.4, 107.5. Anal. Calcd for  $\text{C}_{16}\text{H}_{10}\text{ClN}_5\text{O}_4\text{S}$  (403.80): C, 47.59; H, 2.50; N, 17.34, found C, 47.82; H, 2.67; N, 17.52.

### 1.6 2-(2-(4-Chloro-3-nitrobenzylidene)hydrazineyl)-4-(4-chlorophenyl)thiazole (3e)

Yellow solid: 78% yield; mp 232–234°C; IR (KBr,  $\text{cm}^{-1}$ ) 3313 (NH), 3039 (CH aromatic), 2873, 2804 (CH aliphatic), 1631 (C=N), 1608 (C=C);  $^1\text{H}$  NMR (400 MHz,  $\text{DMSO-}d_6$ )  $\delta$  12.57 (s, 1H, NH,  $\text{D}_2\text{O}$  exchangeable), 8.31 (dd,  $J = 7.4, 1.6$  Hz, 1H, ArH), 8.10 (s, 1H, CH=N), 7.97 (dd,  $J = 8.4, 1.6$  Hz, 1H, ArH), 7.89 (t,  $J = 7.4$  Hz, 2H, ArH), 7.82 (d,  $J = 8.4$  Hz, 1H, ArH), 7.56–7.46 (m, 3H, ArH + ArH thiazole);  $^{13}\text{C}$  NMR (100 MHz,  $\text{DMSO-}d_6$ )  $\delta$  167.2, 148.4, 147.0, 139.4, 135.2, 133.3, 132.6, 131.1, 130.9, 130.0, 128.9, 127.7, 123.3, 105.6. Anal. Calcd for  $\text{C}_{16}\text{H}_{10}\text{Cl}_2\text{N}_4\text{O}_2\text{S}$  (393.24): C, 48.87; H, 2.56; N, 14.25, found C, 49.05; H, 2.71; N, 14.53.

### 1.7 1,5-Dimethyl-4-((2-(4-(3-nitrophenyl)thiazol-2-yl)hydrazineylidene)methyl)-2-phenyl-1,2-dihydro-3H-pyrazol-3-one (3f)

Yellowish green solid: 71% yield; mp 238–240°C; IR (KBr,  $\text{cm}^{-1}$ ) 3410 (NH), 3109 (CH aromatic), 2924, 2850 (CH aliphatic), 1647 (C=O), 1608 (C=N), 1580 (C=C);  $^1\text{H}$  NMR (400 MHz,  $\text{DMSO-}d_6$ )  $\delta$  11.93 (s, 1H, NH,  $\text{D}_2\text{O}$  exchangeable), 8.67 (s, 1H, ArH), 8.30 (d,  $J = 8.0$  Hz, 1H, ArH), 8.15 (dd,  $J = 8.0, 1.6$  Hz, 1H, ArH), 7.88 (s, 1H, CH=N), 7.71 (t,  $J = 8.0$  Hz, 1H, ArH), 7.60 (s, 1H, ArH thiazole), 7.54 (t,  $J = 7.6$  Hz, 2H, ArH), 7.40 (t,  $J = 7.6$  Hz, 1H, ArH), 7.37–7.35 (m, 2H, ArH), 3.26 (s, 3H,  $\text{NCH}_3$ ), 2.62 (s, 3H,  $\text{CH}_3$ );  $^{13}\text{C}$  NMR (100 MHz,  $\text{DMSO-}d_6$ )  $\delta$  169.2, 164.0, 152.5, 148.7, 148.6, 136.8, 136.4, 134.9, 132.0, 130.6, 129.7, 127.8, 125.7, 122.4, 120.3, 106.1, 101.3, 34.9, 12.7. Anal. Calcd for  $\text{C}_{21}\text{H}_{18}\text{N}_6\text{O}_3\text{S}$  (434.47): C, 58.05; H, 4.18; N, 19.34, found C, 58.31; H, 4.32; N, 19.62.

### 1.8 4-((2-(4-(4-Bromophenyl)thiazol-2-yl)hydrazineylidene)methyl)-1,5-dimethyl-2-phenyl-1,2-dihydro-3H-pyrazol-3-one (3g)

Buff solid: 80% yield; mp 234–236°C; IR (KBr,  $\text{cm}^{-1}$ ) 3221 (NH), 3051 (CH aromatic), 2939, 2850 (CH aliphatic), 1647 (C=O), 1610 (C=N), 1562 (C=C);  $^1\text{H}$  NMR (400 MHz,  $\text{DMSO-}d_6$ )  $\delta$  11.82 (s, 1H, NH,  $\text{D}_2\text{O}$  exchangeable), 7.88 (s, 1H, CH=N), 7.80 (d,  $J = 8.4$  Hz, 2H, ArH), 7.59 (d,  $J = 8.4$  Hz, 2H, ArH), 7.53 (t,  $J = 7.6$

Hz, 2H, ArH), 7.46–7.40 (m, 1H, ArH), 7.36–7.30 (m, 3H, ArH + ArH thiazole), 3.24 (s, 3H, NCH<sub>3</sub>), 2.61 (s, 3H, CH<sub>3</sub>); <sup>13</sup>C NMR (100 MHz, DMSO-*d*<sub>6</sub>) δ 169.3, 161.8, 152.5, 152.0, 149.7, 131.9, 130.0, 129.7, 128.1, 128.0, 127.9, 125.7, 120.8, 104.2, 101.3, 34.5, 10.7. Anal. Calcd for C<sub>21</sub>H<sub>18</sub>BrN<sub>5</sub>OS (468.37): C, 53.85; H, 3.87; N, 14.95, found C, 54.09; H, 4.03; N, 15.17.

### 1.9 2-(2-(4-(Benzyloxy)benzylidene)hydrazineyl)-4-phenylthiazole (3h)

Buff solid: 78% yield; mp 212–214°C; IR (KBr, cm<sup>-1</sup>) 3224 (NH), 3039 (CH aromatic), 2924, 2873 (CH aliphatic), 1612 (C=N), 1562 (C=C); <sup>1</sup>H NMR (400 MHz, DMSO-*d*<sub>6</sub>) δ 12.12 (s, 1H, NH, D<sub>2</sub>O exchangeable), 8.02 (s, 1H, CH=N), 7.85 (d, *J* = 7.2 Hz, 2H, ArH), 7.62 (d, *J* = 8.8 Hz, 2H, ArH), 7.47 (d, *J* = 7.2 Hz, 2H, ArH), 7.44–7.39 (m, 4H, ArH), 7.36–7.29 (m, 3H, ArH + ArH thiazole), 7.09 (d, *J* = 8.8 Hz, 2H, ArH), 5.16 (s, 2H, OCH<sub>2</sub>); <sup>13</sup>C NMR (100 MHz, DMSO-*d*<sub>6</sub>) δ 168.4, 162.7, 160.0, 137.2, 131.9, 130.9, 129.8, 129.5, 128.9, 128.5, 128.3, 128.2, 126.3, 116.0, 115.7, 69.8. Anal. Calcd for C<sub>23</sub>H<sub>19</sub>N<sub>3</sub>OS (385.49): C, 71.66; H, 4.97; N, 10.90, found C, 71.92; H, 4.84; N, 11.16.

### 1.10 2-(2-(4-(Benzyloxy)benzylidene)hydrazineyl)-4-(3-nitrophenyl)thiazole (3i)

Brown solid: 75% yield; mp 210–212°C; IR (KBr, cm<sup>-1</sup>) 3224 (NH), 3059 (CH aromatic), 2931, 2873 (CH aliphatic), 1620 (C=N), 1597 (C=C); <sup>1</sup>H NMR (400 MHz, DMSO-*d*<sub>6</sub>) δ 12.27 (s, 1H, NH, D<sub>2</sub>O exchangeable), 8.66 (s, 1H, ArH), 8.28 (d, *J* = 8.0 Hz, 1H, ArH), 8.13 (dd, *J* = 8.0, 1.6 Hz, 1H, ArH), 8.01 (s, 1H, CH=N), 7.69 (t, *J* = 8.0 Hz, 1H, ArH), 7.61–7.59 (m, 2H, ArH + ArH thiazole), 7.45 (d, *J* = 7.2 Hz, 2H, ArH), 7.39 (t, *J* = 7.2 Hz, 2H, ArH), 7.33 (d, *J* = 7.2 Hz, 1H, ArH), 7.08–7.05 (m, 3H, ArH), 5.13 (s, 2H, OCH<sub>2</sub>); <sup>13</sup>C NMR (100 MHz, DMSO-*d*<sub>6</sub>) δ 172.7, 164.6, 157.4, 148.4, 140.0, 136.2, 134.0, 132.3, 131.4, 129.3, 128.9, 128.5, 128.3, 128.2, 124.5, 122.8, 115.7, 93.2, 70.1. Anal. Calcd for C<sub>23</sub>H<sub>18</sub>N<sub>4</sub>O<sub>3</sub>S (430.48): C, 64.17; H, 4.21; N, 13.02, found C, 64.40; H, 4.35; N, 13.29.

### 1.11 2-(2-(4-(Benzyloxy)-3-methoxybenzylidene)hydrazineyl)-4-phenylthiazole (3j)

Yellowish green solid: 71% yield; mp 206–208°C; IR (KBr, cm<sup>-1</sup>) 3224 (NH), 3059 (CH aromatic), 2935, 2870 (CH aliphatic), 1612 (C=N), 1570 (C=C); <sup>1</sup>H NMR (400 MHz, DMSO-*d*<sub>6</sub>) δ 12.00 (s, 1H, NH, D<sub>2</sub>O exchangeable), 8.04 (s, 1H, CH=N), 7.85 (d, *J* = 7.2 Hz, 2H, ArH), 7.46 (d, *J* = 7.2 Hz, 3H, ArH), 7.41 (d, *J* = 8.0 Hz, 3H, ArH), 7.36–7.31 (m, 4H, ArH + ArH thiazole), 7.18 (dd, *J* = 8.4, 1.6 Hz, 1H, ArH), 7.12–7.09 (m, 1H, ArH), 5.13 (s, 2H, OCH<sub>2</sub>), 3.83 (s, 3H, OCH<sub>3</sub>); <sup>13</sup>C NMR (100 MHz, DMSO-*d*<sub>6</sub>) δ 166.5, 157.4, 149.8, 149.3, 135.6, 132.3, 129.9, 129.8, 129.5, 128.9, 128.4, 128.3, 128.1, 126.3, 121.2, 113.1, 110.2, 109.1, 70.3, 56.0. Anal. Calcd for C<sub>24</sub>H<sub>21</sub>N<sub>3</sub>O<sub>2</sub>S (415.51): C, 69.38; H, 5.09; N, 10.11, found C, 69.09; H, 5.21; N, 10.34.

### 1.12 2-(2-(4-(Benzyloxy)-3-methoxybenzylidene)hydrazineyl)-4-(3-nitrophenyl)thiazole (3k)

Brown solid: 68% yield; mp 200–202°C; IR (KBr, cm<sup>-1</sup>) 3236 (NH), 3062 (CH aromatic), 2916, 2866 (CH aliphatic), 1635 (C=N), 1590 (C=C); <sup>1</sup>H NMR (400 MHz, DMSO-*d*<sub>6</sub>) δ 12.20 (s, 1H, NH, D<sub>2</sub>O exchangeable), 8.68 (t, *J* = 2.0 Hz, 1H, ArH), 8.30 (d, *J* = 8.0 Hz, 1H, ArH), 8.16–8.13 (m, 1H, ArH), 7.99 (s, 1H, CH=N), 7.71 (t, *J* = 8.0 Hz, 1H, ArH), 7.64 (s, 1H, ArH thiazole), 7.46 (d, *J* = 6.8 Hz, 2H, ArH), 7.42–7.39 (m, 2H, ArH), 7.37–7.34 (m, 1H, ArH), 7.31 (d, *J* = 1.6 Hz, 1H, ArH), 7.17 (dd, *J* = 8.4, 1.6 Hz, 1H, ArH), 7.10 (d, *J* = 8.4 Hz, 1H, ArH), 5.13 (s, 2H, OCH<sub>2</sub>), 3.84 (s, 3H, OCH<sub>3</sub>); <sup>13</sup>C NMR (100 MHz, DMSO-*d*<sub>6</sub>) δ 169.1, 149.8, 149.6, 148.7, 148.4,

142.3, 137.3, 134.0, 132.0, 130.7, 130.5, 128.9, 128.3, 127.5, 123.2, 122.6, 120.4, 113.8, 109.2, 106.6, 70.4, 55.9. Anal. Calcd for C<sub>24</sub>H<sub>20</sub>N<sub>4</sub>O<sub>4</sub>S (460.51): C, 62.60; H, 4.38; N, 12.17, found C, 62.43; H, 4.51; N, 12.43.

### 1.13 2-(2-(4-(Benzyloxy)-3-methoxybenzylidene)hydrazineyl)-4-(4-chlorophenyl)thiazole (3l)

Buff solid: 74% yield; mp 210–212°C; IR (KBr, cm<sup>-1</sup>) 3421 (NH), 3082 (CH aromatic), 2920, 2862 (CH aliphatic), 1616 (C=N), 1573 (C=C); <sup>1</sup>H NMR (400 MHz, DMSO-*d*<sub>6</sub>) δ 12.07 (s, 1H, NH, D<sub>2</sub>O exchangeable), 7.99 (s, 1H, CH=N), 7.87 (d, *J* = 8.8 Hz, 2H, ArH), 7.48–7.46 (m, 4H, ArH), 7.41 (t, *J* = 7.2 Hz, 2H, ArH), 7.38 (s, 1H, ArH thiazole), 7.36–7.30 (m, 2H, ArH), 7.17 (dd, *J* = 8.4, 1.6 Hz, 1H, ArH), 7.10 (d, *J* = 8.4 Hz, 1H, ArH), 5.13 (s, 2H, OCH<sub>2</sub>), 3.83 (s, 3H, OCH<sub>3</sub>); <sup>13</sup>C NMR (100 MHz, DMSO-*d*<sub>6</sub>) δ 168.0, 149.8, 143.2, 137.2, 137.1, 131.8, 130.4, 130.0, 129.9, 128.9, 128.9, 128.6, 128.4, 128.3, 120.7, 113.8, 113.3, 109.1, 70.3, 56.0. Anal. Calcd for C<sub>24</sub>H<sub>20</sub>ClN<sub>3</sub>O<sub>2</sub>S (449.95): C, 64.07; H, 4.48; N, 9.34, found C, 63.98; H, 4.59; N, 9.52.

### 1.14 2-(2-(4-(Benzyloxy)-3-ethoxybenzylidene)hydrazineyl)-4-phenylthiazole (3m)

Buff solid: 77% yield; mp 190–192°C; IR (KBr, cm<sup>-1</sup>) 3402 (NH), 3059 (CH aromatic), 2927, 2873 (CH aliphatic), 1624 (C=N), 1573 (C=C); <sup>1</sup>H NMR (400 MHz, DMSO-*d*<sub>6</sub>) δ 12.09 (s, 1H, NH, D<sub>2</sub>O exchangeable), 7.97 (s, 1H, CH=N), 7.86 (d, *J* = 7.2 Hz, 2H, ArH), 7.47 (d, *J* = 7.2 Hz, 2H, ArH), 7.43–7.39 (m, 4H, ArH), 7.36–7.29 (m, 4H, ArH + ArH thiazole), 7.15 (dd, *J* = 8.0, 1.6 Hz, 1H, ArH), 7.09 (d, *J* = 8.4 Hz, 1H, ArH), 5.16 (s, 2H, OCH<sub>2</sub>), 4.10 (q, *J* = 6.8 Hz, 2H, OCH<sub>2</sub>CH<sub>3</sub>), 1.37 (t, *J* = 6.8 Hz, 3H, OCH<sub>2</sub>CH<sub>3</sub>); <sup>13</sup>C NMR (100 MHz, DMSO-*d*<sub>6</sub>) δ 168.8, 149.9, 149.8, 149.1, 142.7, 137.4, 134.5, 129.1, 128.9, 128.8, 128.6, 128.3, 128.1, 126.1, 120.7, 114.4, 110.7, 104.0, 70.4, 64.4, 15.2. Anal. Calcd for C<sub>25</sub>H<sub>23</sub>N<sub>3</sub>O<sub>2</sub>S (429.54): C, 69.91; H, 5.40; N, 9.78, found C, 70.06; H, 5.63; N, 10.02.

### 1.15 2-(2-(4-(Benzyloxy)-3-ethoxybenzylidene)hydrazineyl)-4-(3-nitrophenyl)thiazole (3n)

Buff solid: 79% yield; mp 206–208°C; IR (KBr, cm<sup>-1</sup>) 3267 (NH), 3051 (CH aromatic), 2978, 2873 (CH aliphatic), 1624 (C=N), 1577 (C=C). <sup>1</sup>H NMR (400 MHz, DMSO-*d*<sub>6</sub>) δ 12.17 (s, 1H, NH, D<sub>2</sub>O exchangeable), 8.67 (t, *J* = 2.0 Hz, 1H, ArH), 8.30 (d, *J* = 8.0 Hz, 1H, ArH), 8.15 (dd, *J* = 8.0, 1.6 Hz, 1H, ArH), 7.97 (s, 1H, CH=N), 7.71 (t, *J* = 8.0 Hz, 1H, ArH), 7.64 (s, 1H, ArH thiazole), 7.46 (d, *J* = 7.2 Hz, 2H, ArH), 7.40 (t, *J* = 7.2 Hz, 2H, ArH), 7.35–7.30 (m, 2H, ArH), 7.17 (dd, *J* = 8.4, 1.6 Hz, 1H, ArH), 7.09 (d, *J* = 8.4 Hz, 1H, ArH), 5.15 (s, 2H, OCH<sub>2</sub>), 4.10 (q, *J* = 7.2 Hz, 2H, OCH<sub>2</sub>CH<sub>3</sub>), 1.37 (t, *J* = 7.2 Hz, 3H, OCH<sub>2</sub>CH<sub>3</sub>); <sup>13</sup>C NMR (100 MHz, DMSO-*d*<sub>6</sub>) δ 167.7, 150.0, 149.1, 148.7, 148.1, 143.3, 137.4, 133.9, 132.0, 130.6, 130.5, 128.9, 128.3, 128.1, 123.1, 122.6, 120.9, 114.2, 110.5, 106.6, 70.4, 64.4, 15.2. Anal. Calcd for C<sub>25</sub>H<sub>22</sub>N<sub>4</sub>O<sub>4</sub>S (474.54): C, 63.28; H, 4.67; N, 11.81, found C, 63.45; H, 4.72; N, 12.07.

### 1.16 2-(2-(4-(Benzyloxy)-3-ethoxybenzylidene)hydrazineyl)-4-(4-chlorophenyl)thiazole (3o)

Buff solid: 72% yield; mp 210–212°C; IR (KBr, cm<sup>-1</sup>) 3290 (NH), 3032 (CH aromatic), 2927, 2873 (CH aliphatic), 1624 (C=N), 1573 (C=C); <sup>1</sup>H NMR (400 MHz, DMSO-*d*<sub>6</sub>) δ 12.05 (s, 1H, NH, D<sub>2</sub>O exchangeable), 7.96 (s, 1H, CH=N), 7.87 (d, *J* = 8.8 Hz, 2H, ArH), 7.48–7.46 (m, 4H, ArH + ArH thiazole), 7.40 (t, *J* = 7.2 Hz, 2H, ArH), 7.37 (s, 1H, ArH), 7.35–7.34 (m, 1H, ArH), 7.29 (d, *J* = 1.6 Hz, 1H, ArH), 7.15 (dd, *J* = 8.4, 1.6 Hz, 1H, ArH), 7.09 (d, *J* = 8.4 Hz, 1H, ArH), 5.15 (s, 2H, OCH<sub>2</sub>), 4.10 (q, *J* = 6.8 Hz, 2H, OCH<sub>2</sub>CH<sub>3</sub>), 1.37 (t, *J* = 6.8 Hz, 3H, OCH<sub>2</sub>CH<sub>3</sub>). <sup>13</sup>C NMR (100 MHz, DMSO-*d*<sub>6</sub>) δ 168.9, 150.0, 149.9, 149.1, 143.2, 137.4, 131.9, 130.4, 130.0,

129.1, 128.9, 128.3, 128.1, 127.7, 121.0, 114.3, 110.7, 104.8, 70.4, 64.4, 15.2. Anal. Calcd for C<sub>25</sub>H<sub>22</sub>ClN<sub>3</sub>O<sub>2</sub>S (463.98): C, 64.72; H, 4.78; N, 9.06, found C, 64.59; H, 4.87; N, 9.29.

### 1.17 2-(2-(4-(Benzyloxy)-3-ethoxybenzylidene)hydrazineyl)-4-(4-bromophenyl)thiazole (3p)

Buff solid: 69% yield; mp 200–202°C; IR (KBr, cm<sup>-1</sup>) 3394 (NH), 3062 (CH aromatic), 2987, 2873 (CH aliphatic), 1606 (C=N), 1570 (C=C); <sup>1</sup>H NMR (400 MHz, DMSO-*d*<sub>6</sub>) δ 12.03 (s, 1H, NH, D<sub>2</sub>O exchangeable), 7.96 (s, 1H, CH=N), 7.81 (d, *J* = 8.4 Hz, 2H, ArH), 7.60 (d, *J* = 8.4 Hz, 2H, ArH), 7.46 (d, *J* = 6.8 Hz, 2H, ArH), 7.42–7.41 (m, 2H, ArH), 7.39 (s, 1H, ArH thiazole), 7.35 (d, *J* = 6.8 Hz, 1H, ArH), 7.29 (d, *J* = 1.6 Hz, 1H, ArH), 7.15 (dd, *J* = 8.4, 1.6 Hz, 1H, ArH), 7.09 (d, *J* = 8.4 Hz, 1H, ArH), 5.15 (s, 2H, OCH<sub>2</sub>), 4.10 (q, *J* = 6.8 Hz, 2H, OCH<sub>2</sub>CH<sub>3</sub>), 1.37 (t, *J* = 6.8 Hz, 3H, OCH<sub>2</sub>CH<sub>3</sub>); <sup>13</sup>C NMR (100 MHz, DMSO-*d*<sub>6</sub>) δ 168.9, 149.9, 149.8, 149.1, 143.2, 137.4, 132.0, 131.8, 130.7, 130.3, 128.9, 128.3, 128.1, 121.1, 120.7, 114.4, 110.7, 104.8, 70.4, 64.4, 15.2. Anal. Calcd for C<sub>25</sub>H<sub>22</sub>BrN<sub>3</sub>O<sub>2</sub>S (508.43): C, 59.06; H, 4.36; N, 8.26, found C, 59.28; H, 4.50; N, 8.49.

## 2- **Biological evaluation**

### 2.1 Measurement of anticancer activity against a panel of 60 cell lines.

Anticancer activity screening of the newly synthesized compounds was measured *in vitro* utilizing 60 different human cancer cell lines provided by US NCI according to previously reported standard procedure as follows:

- Cells were seeded into 96-well microtiter plates in a density of 5,000-1,000 cells per 100 μL/well. Cells were then incubated at 37°C, 5% CO<sub>2</sub>, 95% air, and 100% relative humidity for 24 h before the addition of experimental compounds. After 24 h, two plates of each cell line were fixed in situ with trichloroacetic acid (TCA), to present a measurement of the cell population for each cell line at the time of compound exposure (T<sub>z</sub>).
- Experimental compounds were solubilized in DMSO at 400-fold, the desired final maximum test concentration, and stored frozen before use. At the time of compound addition, an aliquot of frozen concentrate was thawed and diluted to twice the desired final maximum test concentration with a complete medium containing 50 μg/mL gentamicin.
- Additional four, 10-fold or ½ log serial dilutions were made to provide a total of five compound concentrations plus control. Aliquots of 100 μL of these different compound dilutions were added to the appropriate microtiter wells containing 100 μL of the medium, resulting in the required final compound concentrations.
- Following compound addition, the plates were incubated for an additional 48 hr at 37°C, 5% CO<sub>2</sub>, 95% air, and 100% relative humidity. For adherent cells, the assay is terminated by the addition of cold TCA. Cells were fixed in situ by the gentle addition of 50 μL of cold 50% (w/v) TCA (final concentration, 10% TCA and incubated for 60 min. at 4°C. The supernatant was discarded, and the plates were washed five times with tap water and air-dried.
- Sulforhodamine B (SRB) solution (100 μL) at 0.4% (w/v) in 1% acetic acid was added to each well and plates were incubated for 10 min. at room temperature. After staining, the unbound dye was removed by washing

five times with 1% acetic acid and the plates were air-dried. The bound stain was subsequently solubilized with 10 mM Trizma base, and the absorbance was obtained using an automated plate reader at a wavelength of 515 nm. For suspension cells, we used the same methodology except that the assay was terminated by fixing settled cells at the bottom of the wells by gently adding 50  $\mu$ L of 80% TCA (final concentration, 16% TCA). Using the seven absorbance measurements [time zero ( $T_z$ ), control growth (C), and test growth in the presence of a compound at the five concentration levels ( $T_i$ )], the percentage growth was calculated at each of the compound concentration levels. Percentage growth inhibition is calculated as follows:

$$\begin{aligned} & [(T_i - T_z)/(C - T_z)] \times 100 \text{ for concentrations for which } T_i \geq T_z, \\ & [(T_i - T_z)/T_z] \times 100 \text{ for concentrations for which } T_i < T_z \end{aligned}$$

For each experimental agent. Growth inhibition of 50% ( $GI_{50}$ ) is calculated from  $[(T_i - T_z)/(C - T_z)] \times 100 = 50$ , which is the compound concentration resulting in a 50% reduction in the net protein increase (as measured by SRB staining) in control cells during the compound incubation; however, if the effect is not reached or is exceeded, the value for that parameter is expressed as greater or less than the maximum or minimum concentration tested.

## 2.2 MTT assay and selectivity index (SI) calculation

The 3-(4,5-dimethylthiazol-2-yl)-2,5-diphenyltetrazolium bromide (MTT) method of monitoring *in vitro* cytotoxicity is well suited for use with multiwell plates. The assessment of cell population growth is based on the capability of living cells to reduce the yellow product MTT to a blue product, formazan, by a reduction reaction occurring in the mitochondria. The cell lines were incubated for 24 h in 96-microwell plates. The number of living cells in the presence or absence (control) of the various test compounds is directly proportional to the intensity of the blue color, measured by spectrophotometry using (ROBONIK P2000 Spectrophotometer) at a wavelength of 570 nm. Measure the background absorbance of multiwell plates at 690 nm and subtract from the 570 nm measurement. Five concentrations ranging from 0.01  $\mu$ M to 100  $\mu$ M (with a semi-log decrease in concentration) were tested for each of the compounds under study. Each experiment was carried out in triplicate. The  $IC_{50}$  values [the concentration required for 50% inhibition of cell viability] were calculated using sigmoidal dose-response curve-fitting models. The selectivity index (SI) was calculated as the ratio of cytotoxicity ( $IC_{50}$ ) of normal lymphocytes (PCS-800-017) to the leukemia cell line HL-60(TB).

**Table S1.** Percentages of growth inhibition obtained from tests of compounds **3a-q** against a panel of tumor cell lines at a single concentration of (10  $\mu$ M).

| Cell lines                        | Compounds    |              |              |              |              |       |       |       |       |       |       |       |       |       |              |              |       |       |
|-----------------------------------|--------------|--------------|--------------|--------------|--------------|-------|-------|-------|-------|-------|-------|-------|-------|-------|--------------|--------------|-------|-------|
|                                   | 3a           | 3b           | 3c           | 3d           | 3e           | 3f    | 3g    | 3h    | 3i    | 3j    | 3k    | 3l    | 3m    | 3n    | 3o           | 3p           | 3q    |       |
| <b>Leukemia</b>                   |              |              |              |              |              |       |       |       |       |       |       |       |       |       |              |              |       |       |
| CCRF-CEM                          | 59.40        | <b>94.91</b> | 25.72        | 65.66        | <b>81.86</b> | 20.43 | --    | --    | 28.01 | --    | 53.56 | --    | --    | 31.73 | 27.64        | 37.55        | --    |       |
| HL-60(TB)                         | <b>73.44</b> | >100         | >100         | 52.13        | >100         | --    | 27.22 | 16.13 | 49.69 | 51.49 | 54.83 | 36.03 | 26.31 | 41.43 | 45.56        | 22.85        | 21.66 |       |
| K-562                             | 45.39        | <b>92.26</b> | 26.86        | <b>77.08</b> | <b>86.14</b> | 32.21 | 41.9  | --    | 58.43 | 47.14 | 65.07 | 34.26 | 37.47 | 48.21 | 67.36        | 59.13        | 17.23 |       |
| MOLT-4                            | 55.45        | >100         | 37.97        | 58.44        | <b>86.93</b> | --    | 22.16 | --    | 49.58 | 43.52 | 51.06 | 20.61 | 33.59 | 60.49 | 24.42        | 28.39        | --    |       |
| RPMI-8226                         | 53.40        | <b>98.10</b> | <b>85.1</b>  | <b>78.44</b> | >100         | 21.79 | 21.4  | --    | 55.91 | 35.97 | 61.14 | 22.19 | 34.37 | 65.91 | 58.87        | 59.65        | --    |       |
| SR                                | 31.27        | <b>98.89</b> | 22.96        | 53.84        | <b>81.15</b> | --    | 35.61 | --    | 60.14 | 40.82 | 55.36 | 33.08 | --    | 29.37 | 43.93        | 25.36        | --    |       |
| <b>Non-small cell lung cancer</b> |              |              |              |              |              |       |       |       |       |       |       |       |       |       |              |              |       |       |
| A549/ATCC                         | --           | <b>91.8</b>  | --           | --           | --           | --    | --    | 25.63 | 18.49 | 38.48 | 23.60 | --    | --    | 21.93 | <b>87.43</b> | <b>76.42</b> | --    |       |
| EKVX                              | 53.04        | <b>78.52</b> | 31.44        | 21.23        | <b>97.75</b> | 21.07 | 22.91 | 15.39 | 36.28 | 37.02 | 19.30 | 29.67 | 34.62 | 25.80 | 32.59        | 18.56        | 28.34 |       |
| HOP-62                            | --           | >100         | --           | 17.54        | 60.28        | --    | --    | --    | --    | --    | --    | --    | --    | --    | --           | --           | 30.45 |       |
| HOP-92                            | 23.92        | >100         | --           | --           | >100         | 21.68 | --    | --    | --    | 35.81 | --    | 24.16 | 11.71 | --    | 31.88        | 20.97        | 29.45 |       |
| NCI-H226                          | --           | <b>83.99</b> | --           | <b>75.71</b> | <b>89.96</b> | 18.97 | 32.30 | --    | --    | 19.19 | --    | 32.12 | 18.90 | 15.31 | 31.25        | 22           | NT    |       |
| NCI-H23                           | 39.24        | >100         | --           | 44.9         | <b>80.17</b> | 20.85 | 19.69 | --    | 32.67 | 32.55 | 23.84 | 23.55 | 26.07 | --    | 54.58        | 47.28        | 15.88 |       |
| NCI-H322M                         | 34.1         | <b>76.97</b> | <b>83.11</b> | 50.49        | >100         | 16.24 | --    | 24.29 | --    | 23.68 | --    | 15.28 | 19.83 | --    | 22.81        | 15.02        | 16.75 |       |
| NCI-H460                          | 27.32        | >100         | --           | 22.22        | 38.05        | 21.03 | --    | --    | 26.09 | --    | --    | 43.32 | --    | 24.08 | <b>88.78</b> | <b>78.6</b>  | 22.75 |       |
| NCI-H522                          | <b>88.98</b> | >100         | 17.49        | 46.33        | <b>82.28</b> | 33.91 | 27.60 | 18.26 | 25.37 | --    | 33.62 | 39.74 | 20.63 | 31.86 | 31.86        | 60.18        | 17.37 |       |
| <b>Colon Cancer</b>               |              |              |              |              |              |       |       |       |       |       |       |       |       |       |              |              |       |       |
| COLO 205                          | --           | --           | --           | --           | --           | --    | --    | --    | --    | --    | 64.66 | --    | --    | --    | 25.07        | 34.87        | --    |       |
| HCC-2998                          | >100         | <b>88.2</b>  | >100         | >100         | >100         | 21.1  | --    | --    | --    | --    | 16.18 | --    | --    | 16.45 | 25.55        | 18.01        | --    |       |
| HCT-116                           | 34.14        | >100         | --           | --           | 20.87        | 16.68 | --    | --    | 42.7  | 19.96 | 47.76 | 15.42 | 26.36 | 39.24 | <b>87.5</b>  | <b>70.93</b> | --    |       |
| HCT-15                            | 41.66        | <b>92.55</b> | --           | 56.61        | <b>86.41</b> | --    | --    | 50.17 | 52.32 | 32.35 | 46.47 | 34.27 | 19.16 | 45.63 | 61           | 65.84        | 15.17 |       |
| HT29                              | --           | --           | 42.62        | 64.28        | <b>82.35</b> | 16.93 | --    | --    | --    | 17.78 | 16.72 | 31.22 | --    | --    | 68.17        | <b>73.91</b> | --    |       |
| KM12                              | 42.89        | >100         | <b>86.6</b>  | <b>96.1</b>  | >100         | --    | --    | 17.75 | 28.88 | 18.03 | 30.65 | 18.21 | 15.47 | 20.79 | 26.6         | 30.01        | --    |       |
| SW-620                            | --           | <b>99.57</b> | --           | --           | 22.12        | --    | --    | --    | --    | --    | --    | --    | --    | --    | <b>76.18</b> | <b>76.13</b> | --    |       |
| <b>CNS Cancer</b>                 |              |              |              |              |              |       |       |       |       |       |       |       |       |       |              |              |       |       |
| SF-268                            | 29.11        | <b>96.73</b> | --           | --           | 34.71        | --    | --    | 42.42 | --    | --    | --    | --    | --    | --    | --           | --           | --    | 27.12 |
| SF-295                            | 18.92        | >100         | --           | --           | --           | --    | 16.9  | 15.31 | 21.39 | --    | 50.73 | 20.59 | --    | 37.8  | 47.97        | 30.68        | --    |       |



|                        |              |              |              |       |              |       |       |              |       |       |       |       |       |              |       |       |       |
|------------------------|--------------|--------------|--------------|-------|--------------|-------|-------|--------------|-------|-------|-------|-------|-------|--------------|-------|-------|-------|
| SF-539                 | 58.81        | >100         | --           | --    | --           | 35.93 | --    | --           | 31.12 | --    | 48.57 | 22.86 | --    | 26.63        | 61.61 | 37.69 | 57.12 |
| SNB-19                 | 28.77        | <b>96.14</b> | 19.27        | 30.98 | <b>80.07</b> | --    | --    | --           | --    | --    | 25.66 | 34.46 | --    | 16.81        | 23.61 | --    | 21.94 |
| SNB-75                 | 53.81        | >100         | --           | --    | 39.93        | 24.94 | --    | --           | --    | --    | --    | 29.18 | 25.77 | 34.84        | 51.3  | 40.93 | 21.73 |
| U251                   | 21.78        | >100         | --           | 58.23 | 49.15        | --    | --    | --           | 17.78 | --    | 22.24 | --    | --    | 28.24        | 45.29 | 58.5  | 20.33 |
| <b>Melanoma</b>        |              |              |              |       |              |       |       |              |       |       |       |       |       |              |       |       |       |
| LOX IMVI               | <b>85.46</b> | >100         | --           | >100  | <b>90.84</b> | 16.36 | --    | 15.53        | --    | 17.25 | 16.19 | --    | 17.00 | 16.03        | 35.4  | 37.64 | 32.16 |
| MALME-3M               | --           | >100         | --           | 33.15 | 50.91        | 29.42 | --    | --           | 22.17 | 27.59 | 19.58 | 29.06 | --    | --           | 32.73 | 34.00 | 22.26 |
| M14                    | 43.1         | >100         | --           | 46.25 | 31.31        | --    | --    | --           | --    | --    | 21.40 | --    | 30.41 | 23.95        | 45.97 | 33.88 | 18.79 |
| MDA-MB-435             | 28.79        | >100         | --           | --    | --           | --    | --    | --           | 15.55 | --    | --    | --    | --    | 22.41        | 43.55 | 43.55 | --    |
| SK-MEL-2               | --           | >100         | --           | --    | --           | --    | --    | --           | --    | --    | --    | --    | --    | --           | --    | --    | --    |
| SK-MEL-28              | 28.01        | <b>98.65</b> | --           | 37.64 | <b>74.32</b> | --    | --    | --           | --    | --    | 19.76 | --    | --    | 20.44        | --    | 17.45 | --    |
| SK-MEL-5               | 53.67        | >100         | --           | 35.44 | 59.62        | 22.91 | 26.63 | --           | 41.23 | 34.24 | 28.75 | 20.56 | 15.47 | 26.9         | 19.64 | 17.53 | 18.62 |
| UACC-257               | 18.45        | >100         | --           | 16.26 | 49.16        | 18.39 | 17.94 | --           | --    | --    | --    | --    | --    | 18.91        | --    | --    | --    |
| UACC-62                | 46.06        | >100         | --           | --    | --           | 16.79 | 22.46 | 46.13        | 24.99 | 37.25 | 26.41 | 28.76 | 33.07 | 28.76        | 24.88 | 25.09 | 17.56 |
| <b>Ovarian cancer</b>  |              |              |              |       |              |       |       |              |       |       |       |       |       |              |       |       |       |
| IGROV1                 | 59.43        | >100         | --           | 18.63 | 67.11        | --    | --    | --           | --    | 35.38 | --    | --    | 36.22 | --           | 33.04 | 20.85 | --    |
| OVCAR-3                | 40.3         | >100         | <b>96.18</b> | >100  | >100         | --    | --    | --           | --    | 23.4  | --    | --    | 23.61 | --           | --    | --    | --    |
| OVCAR-4                | 45.81        | >100         | --           | --    | 26.41        | 44.46 | 22.78 | 17.98        | 38.2  | 38.18 | 33.62 | 30.19 | 23.54 | 38.01        | 58.49 | 36.39 | 22.68 |
| OVCAR-5                | --           | <b>83.55</b> | --           | --    | --           | --    | --    | --           | --    | --    | --    | --    | --    | --           | 15.11 | --    | --    |
| OVCAR-8                | 22.41        | <b>97.1</b>  | --           | --    | 16.97        | --    | --    | --           | --    | --    | 18.61 | 18.57 | --    | --           | 49.16 | 42.39 | 35.08 |
| NCI/ADR-RES            | 24.09        | >100         | NT           | NT    | NT           | 25.77 | --    | NT           | NT    | NT    | NT    | NT    | 16.65 | 23.42        | 58.7  | 51.54 | 40.49 |
| SK-OV-3                | --           | <b>80.72</b> | --           | --    | --           | --    | --    | --           | --    | --    | --    | --    | --    | --           | --    | --    | 40.84 |
| <b>Renal Cancer</b>    |              |              |              |       |              |       |       |              |       |       |       |       |       |              |       |       |       |
| 786-0                  | 19.88        | >100         | --           | --    | --           | 30.32 | --    | --           | 19.33 | --    | 56.5  | --    | --    | 49.32        | 53.87 | 28.09 | --    |
| A498                   | --           | --           | --           | --    | --           | --    | 16.71 | --           | --    | --    | --    | --    | --    | NT           | 21.33 | --    | --    |
| ACHN                   | 35.01        | <b>99.95</b> | --           | --    | --           | 31.59 | --    | <b>79.82</b> | 20.22 | 29.58 | 24.81 | 31.04 | 17.87 | 19.97        | 39.1  | 21.34 | 18.09 |
| CAKI-1                 | 49.83        | >100         | --           | --    | 39.94        | 27.17 | --    | 45.57        | 20.11 | 29.18 | 34.96 | 26.63 | 24.09 | 28.8         | 24.04 | 18.26 | 18.6  |
| RXF 393                | 22.21        | >100         | --           | --    | 68.9         | --    | --    | --           | 25.86 | --    | 68.51 | --    | --    | <b>79.23</b> | 29.52 | 25.01 | 22.03 |
| SN12C                  | 30.88        | >100         | --           | 23.06 | 48.25        | --    | --    | --           | 24.76 | 24.37 | 26.83 | --    | 16.04 | 17.13        | 28.47 | 25.27 | 19.48 |
| TK-10                  | --           | >100         | --           | --    | --           | --    | --    | --           | --    | --    | 15.38 | --    | --    | --           | --    | --    | --    |
| UO-31                  | 66.01        | <b>98.32</b> | --           | 36.67 | 32.14        | 25.48 | 22.09 | 40.39        | 33.18 | 54.03 | 31.49 | 26.78 | 48.12 | 33.55        | 44.94 | 29.21 | 15.44 |
| <b>Prostate Cancer</b> |              |              |              |       |              |       |       |              |       |       |       |       |       |              |       |       |       |
| PC-3                   | 54.86        | <b>93.38</b> | 40.1         | 33.67 | >100         | --    | --    | 37.45        | 32.14 | 41.05 | 37.82 | 30.81 | 31.71 | 32.58        | 29.67 | 40.37 | --    |

|                         |              |               |              |              |              |       |       |       |       |       |       |       |       |       |       |       |       |
|-------------------------|--------------|---------------|--------------|--------------|--------------|-------|-------|-------|-------|-------|-------|-------|-------|-------|-------|-------|-------|
| <b>DU-145</b>           | --           | >100          | 63.72        | 38.17        | <b>99.19</b> | --    | --    | 19.73 | 25.99 | --    | 25.89 | --    | --    | --    | 63.74 | 34    | 16.45 |
| <b>Breast Cancer</b>    |              |               |              |              |              |       |       |       |       |       |       |       |       |       |       |       |       |
| <b>MCF7</b>             | <b>75.82</b> | >100          | <b>89.86</b> | <b>97.95</b> | >100         | 22.9  | --    | 34.93 | 47.38 | 41.77 | 35.94 | 45.02 | 26.34 | 38.92 | 42.99 | 31.98 | 36.18 |
| <b>MDA-MB-231/ATC C</b> | 45.34        | >100          | --           | 22.45        | <b>74.93</b> | 38.76 | --    | 17.41 | --    | 31.89 | 39.05 | 33.93 | 32.06 | 18.51 | 31.73 | 30.68 | 29.54 |
| <b>HS 578T</b>          | 34.02        | 65.19         | 27.01        | <b>75.99</b> | >100         | 43.39 | --    | --    | --    | --    | 36.38 | 27.78 | 18.74 | 25.02 | 35.79 | 34.63 | 40.54 |
| <b>BT-549</b>           | 67.47        | >100          | --           | 52.5         | --           | 20.69 | 21.68 | --    | --    | --    | NT    | --    | 19.19 | 15.5  | 32.31 | --    | 28.38 |
| <b>T-47D</b>            | 58.45        | >100          | >100         | <b>91.54</b> | >100         | 36.84 | 34.85 | 37.92 | 33.45 | 45.22 | 63.92 | 27.62 | 47.96 | 48.12 | 40.4  | 24.51 | 23.36 |
| <b>MDA-MB-468</b>       | <b>89.79</b> | >100          | >100         | >100         | >100         | 51.18 | 40.98 | --    | 26.36 | 19.26 | 38.87 | --    | 21.79 | 38.36 | 41.91 | 32.51 | 33.94 |
| <b>Mean inhibition</b>  | 36.86        | <b>111.56</b> | 21.54        | 36.04        | <b>65.96</b> | 16.24 | 9.82  | 13.09 | 18.51 | 19.06 | 28.81 | 16.48 | 14.46 | 23.85 | 37.06 | 31.83 | 18.2  |

-- Inhibition of growth by the compound is less than 15%.

\* The bold figures indicate **Strong (GI% > 70%)**

### 2.3 *In vitro* PI3K inhibitory assay

The inhibitory rate against PI3K of compounds **3b** and **3e** were assayed *in-vitro* using the PI3K $\alpha$  (p110 $\alpha$ /p85 $\alpha$ ) Assay Kit Catalog #79781, BPS Bioscience, Inc, San Diego, CA, USA according to the manufacturer's instructions. Mix 750  $\mu$ L Kinase assay buffer and 750  $\mu$ L distilled water (1:1) to prepare 2.5x Kinase assay buffer. Mix 25  $\mu$ L of 500  $\mu$ M ATP (provided) and 975  $\mu$ L distilled water to prepare 12.5  $\mu$ M ATP solution. Calculate the amount of PI3K $\alpha$  required for the assay and dilute enzyme to  $\sim$  0.5 ng/ $\mu$ L with 2.5x Kinase assay buffer prepared in step 2. Store remaining undiluted enzyme in aliquots at -80°C. add 5  $\mu$ L PI3K lipid substrate first, 5  $\mu$ L inhibitor second, 5  $\mu$ L 12.5  $\mu$ M ATP third and 10  $\mu$ L of diluted PI3K $\alpha$ ). Add 5  $\mu$ L PI3K lipid substrate to all wells. Add 5  $\mu$ L of 5x Inhibitor solution of each well labeled as "Test Inhibitor." For the "Positive Control" and "Blank," add 5  $\mu$ L of the same solution without inhibitor. Add 5  $\mu$ L diluted ATP to all wells. To the wells designated as "Blank," add 10  $\mu$ L of 2.5x Kinase assay buffer. Initiate reaction by adding 10  $\mu$ L of diluted PI3K $\alpha$  enzyme to the wells designated "Positive Control" and "Test Inhibitor." Carefully shake the plate well and incubate it at 30°C for 40 min. After the 40 minutes reaction, add 25  $\mu$ L of ADP-Glo reagent to each well. Cover plate with aluminum foil and incubate the plate at room temperature for 45 min. After the 45 min incubation, add 50  $\mu$ L of Kinase Detection reagent to each well. Measure luminescence using the microplate reader. "

### 2.4 *In vitro* mTOR inhibitory assay

The inhibitory rate against PI3K of compounds **3b** and **3e** were assayed *in-vitro* using mTOR/Raptor/MLST8 Complex, Catalog #: 40300 according to the manufacturer's directions. Assay was done using ADP-Glo (Promega) reagents with 100  $\mu$ M ATP, 0.1 mg/mL 4EBP1 and 5 mM MnCl<sub>2</sub> in 25  $\mu$ L using kinase buffer (40 mM Tris HCl pH 7.4, 20 mM MgCl<sub>2</sub>, 0.1 mg/mL BSA, and 2 mM DTT). Reaction was performed at 30°C for 45 min.

| Conc | % inhibition |
|------|--------------|
| 100  | 94           |
| 10   | 89           |
| 1    | 71           |
| 0.1  | 49           |
| 0.01 | 33           |

e

2.718282

| Conc.       | nd % inhibi | Excel-Fit      |
|-------------|-------------|----------------|
| <b>100</b>  | 94          | <b>99.6001</b> |
| 10          | 89          | 99.6001        |
| 1           | 71          | 67.2           |
| 0.1         | 49          | 50.9999        |
| 0.01        | 33          | 34.7999        |
|             |             |                |
| <b>IC50</b> | 0.086       | 0.08675        |
|             |             |                |
|             |             | 7.0356         |
|             |             | 67.2           |

Equation that describes the curve

$$y = 7.0356 \ln(x) + 67.2$$

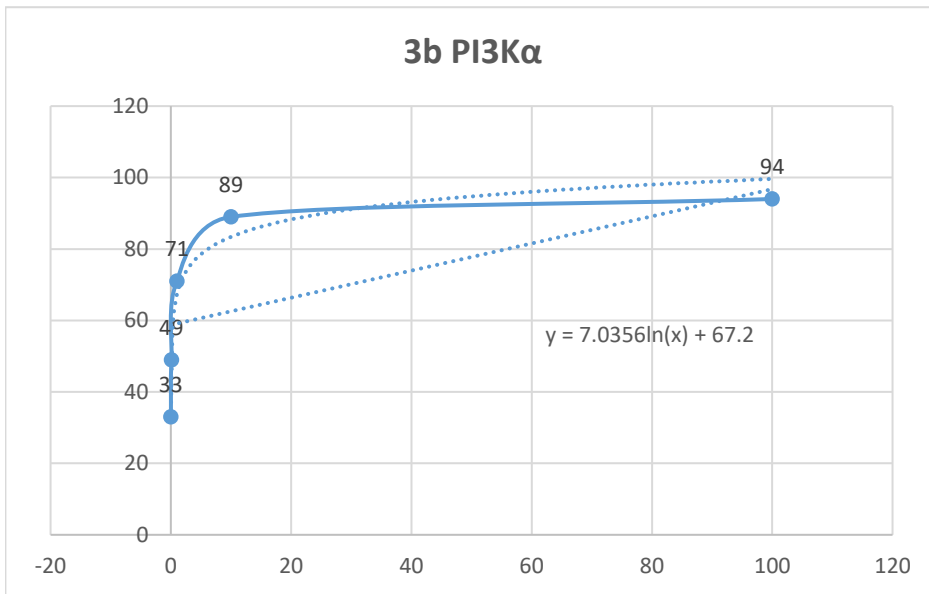

| Conc | % inhibition |
|------|--------------|
| 100  | 93           |
| 10   | 85           |
| 1    | 63           |
| 0.1  | 47           |
| 0.01 | 30           |
|      |              |

e

2.718282

| Conc.       | Ind % inhibit | Excel-Fit        |
|-------------|---------------|------------------|
| <b>100</b>  | 93            | <b>96.399864</b> |
| 10          | 85            | 96.399864        |
| 1           | 63            | 63.6             |
| 0.1         | 47            | 47.200068        |
| 0.01        | 30            | 30.800136        |
|             |               |                  |
| <b>IC50</b> | 0.148         | 0.1481591        |
|             |               |                  |
|             |               | 7.1224           |
|             |               | 63.6             |

Equation that describes the curve

$$y = 7.1224 \ln(x) + 63.6$$

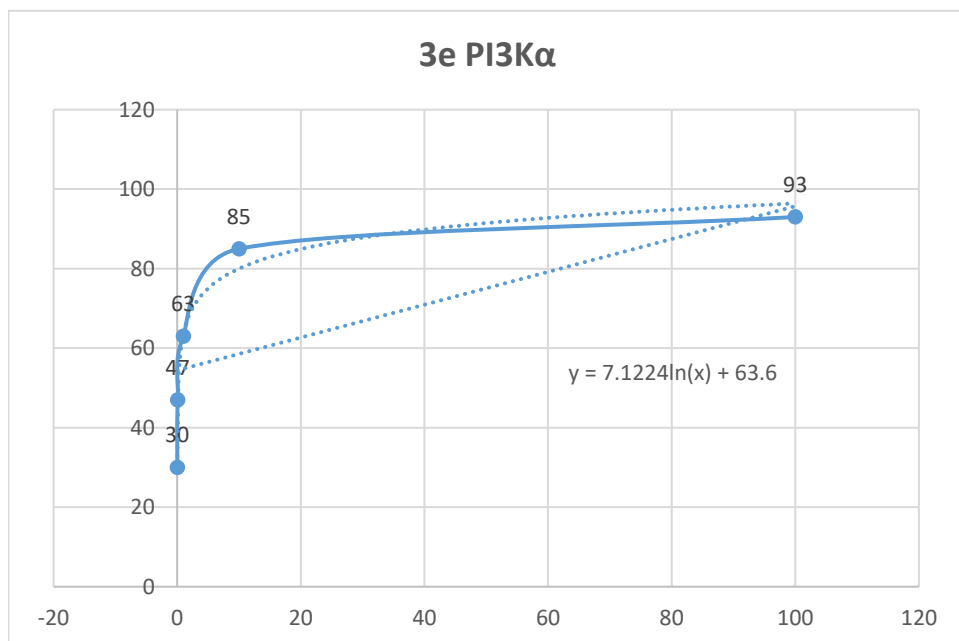

| Conc | % inhibition |
|------|--------------|
| 100  | 93           |
| 10   | 82           |
| 1    | 61           |
| 0.1  | 43           |
| 0.01 | 27           |

e  
2.718282

| Conc.       | nd % inhibi | Excel-Fit        |
|-------------|-------------|------------------|
| <b>100</b>  | 93          | <b>95.399836</b> |
| 10          | 82          | 95.399836        |
| 1           | 61          | 61.2             |
| 0.1         | 43          | 44.100082        |
| 0.01        | 27          | 27.000164        |
|             |             |                  |
| <b>IC50</b> | 0.221       | 0.2213228        |
|             |             |                  |
|             |             | 7.4264           |
|             |             | 61.2             |

Equation that describes the curve  
 $y = 7.4264 \ln(x) + 61.2$

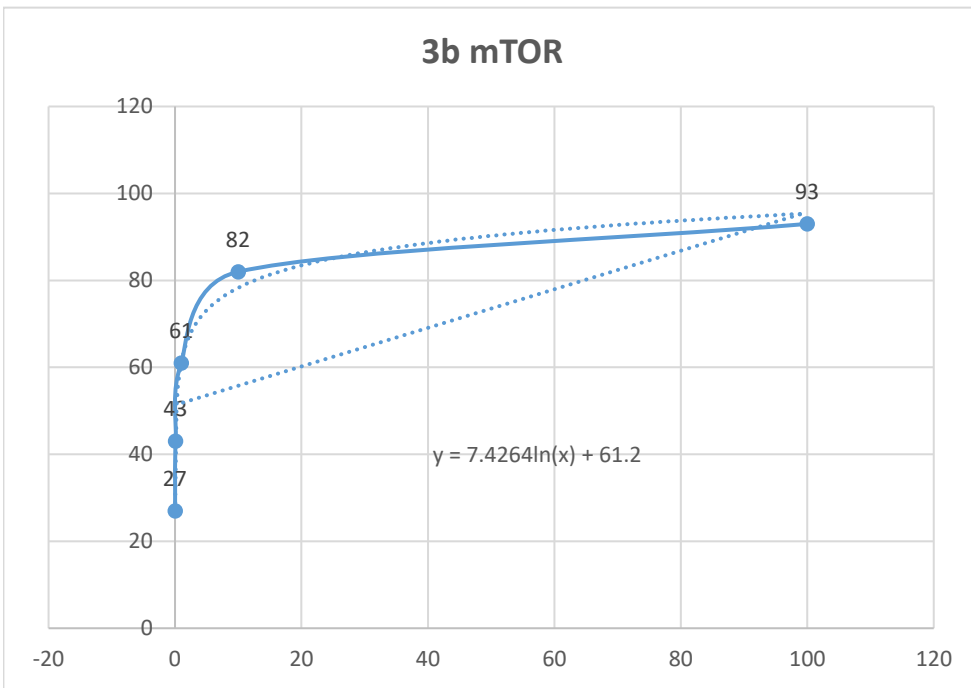

| Conc | % inhibition |
|------|--------------|
| 100  | 92           |
| 10   | 75           |
| 1    | 50           |
| 0.1  | 27           |
| 0.01 | 11           |

e

2.718282

| Conc.       | nd % inhibi | Excel-Fit        |
|-------------|-------------|------------------|
| <b>100</b>  | 92          | <b>93.000073</b> |
| 10          | 75          | 93.000073        |
| 1           | 50          | 51               |
| 0.1         | 27          | 29.999963        |
| 0.01        | 11          | 8.9999269        |
|             |             |                  |
| <b>IC50</b> | 0.896       | 0.8961507        |
|             |             |                  |
|             |             | 9.1202           |
|             |             | 51               |

Equation that describes the curve

$$y = 9.1202 \ln(x) + 51$$

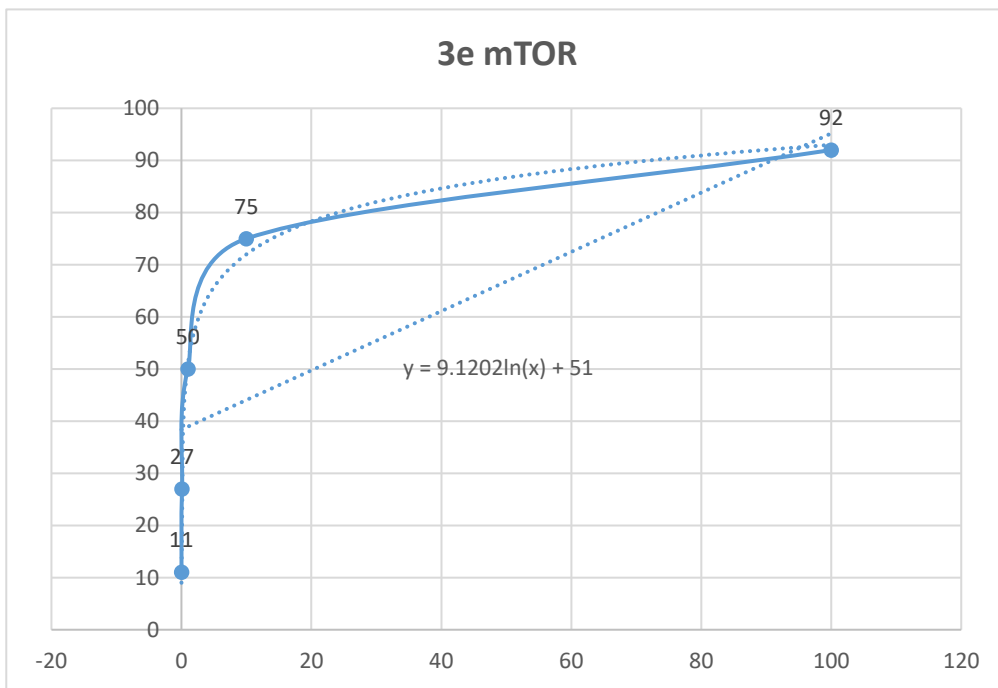

| Conc | % inhibition |
|------|--------------|
| 100  | 95           |
| 10   | 82           |
| 1    | 68           |
| 0.1  | 49           |
| 0.01 | 36           |

e

2.718282

| Conc.       | und % inhibiti | Excel-Fit       |
|-------------|----------------|-----------------|
| <b>100</b>  | 95             | <b>96.19979</b> |
| 10          | 82             | 96.19979        |
| 1           | 68             | 66              |
| 0.1         | 49             | 50.90011        |
| 0.01        | 36             | 35.80021        |
|             |                |                 |
| <b>IC50</b> | 0.087          | 0.087175        |
|             |                |                 |
|             |                | 6.5578          |
|             |                | 66              |

Equation that describes the curve

$$y = 6.5578 \ln(x) + 66$$

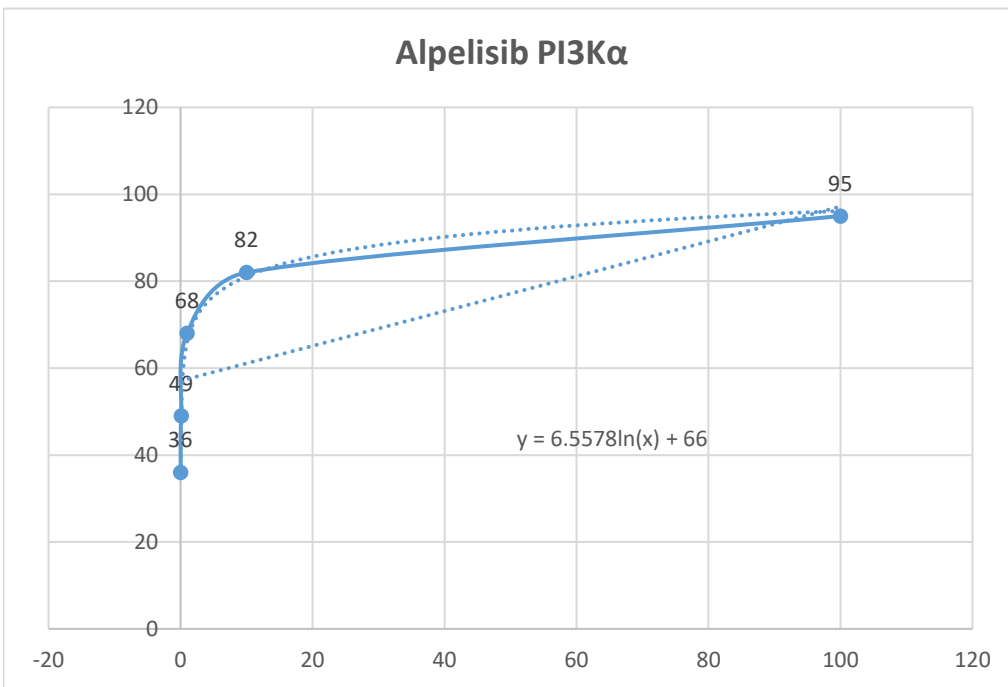



| Conc | % inhibition |
|------|--------------|
| 100  | 96           |
| 10   | 86           |
| 1    | 70           |
| 0.1  | 47           |
| 0.01 | 30           |

e

2.7183

| Conc.       | Ind % inhibit | Excel-Fit       |
|-------------|---------------|-----------------|
| <b>100</b>  | 96            | <b>99.99984</b> |
| 10          | 86            | 99.99984        |
| 1           | 70            | 65.8            |
| 0.1         | 47            | 48.70008        |
| 0.01        | 30            | 31.60016        |
|             |               |                 |
| <b>IC50</b> | 0.119         | 0.119129        |
|             |               |                 |
|             |               | 7.4264          |
|             |               | 65.8            |

Equation that describes the curve

$$y = 7.4264 \ln(x) + 65.8$$

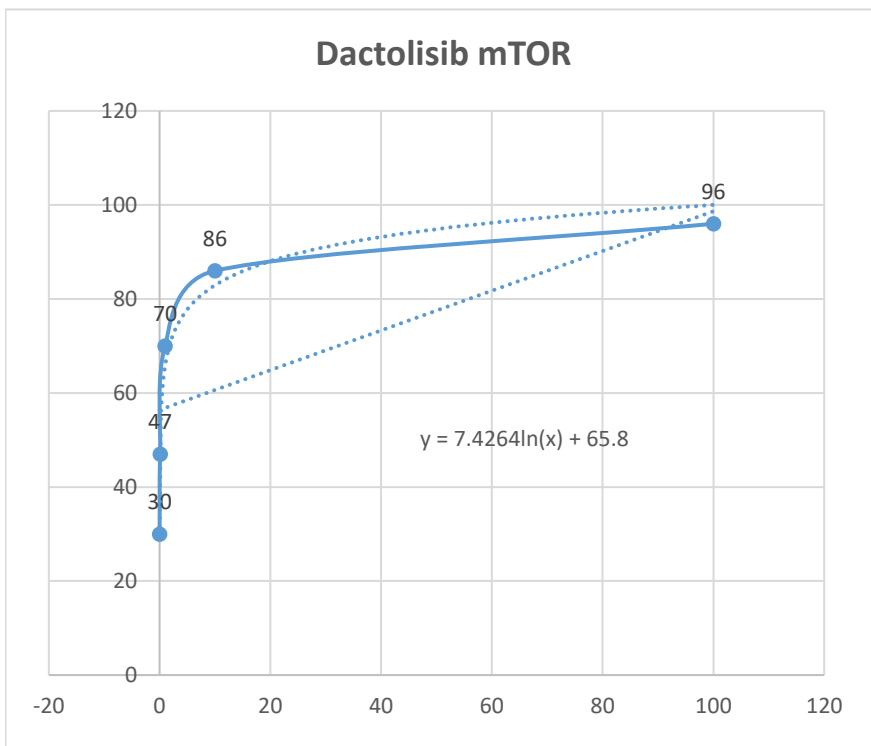

## 2.5 Cell cycle analysis

Flow cytometry was used to analyze the cell cycle using ab139418 propidium iodide flow cytometry kit/BD (Abcam, Cambridge, UK), as directed by the manufacturer guidelines. leukemia HL60(TB) cells were treated with compounds **3b** and **3e** at their IC<sub>50</sub> values (2.32 and 2.29  $\mu$ M, respectively) for 24 h. The cells were washed twice with ice-cold phosphate buffer saline (PBS) and collected by centrifugation. The cells were then fixed using ice-cold 66% (v/v) ethanol, washed with PBS, and re-suspended with 0.1 mg/mL RNase to digest cellular RNA and thus minimize stained RNA in the background. The cells were next stained with PI, a fluorescent molecule that may bind to nucleic acid, at a concentration of 40 mg/mL. In cells, PI attaches to DNA in proportion to its amount. Because the DNA content of cells at different stages of the cell cycle differs, the fluorescence intensity can be used to assess the stage of cell growth. FacsCalibur (BD Biosciences, USA) was used to estimate cell fluorescence, which was then examined using Cell-Quest software (Becton Dickinson). Cell cycle analysis of leukemia HL-60(TB) cells without any treatment was used as a control.

## 2.6 Apoptosis assay

According to the manufacturer's instructions, flow cytometry was used to analyze apoptosis using Annexin V and propidium iodide double-staining apoptosis detection kit (Biovision, USA). Annexin V is a phosphatidylserine (PS) binding protein with a high affinity. After beginning apoptosis, the latter is a cell membrane component that translocate from the inner face of the plasma membrane to the cell surface. PS can be detected on the cell surface using a fluorescent Annexin V conjugate. Leukemia HL-60(TB) cells ( $5 \times 10^5$ ) were exposed to compounds **3b** and **3e** at their IC<sub>50</sub> values and subsequently incubated for 24 h. After that, the cells were centrifuged and resuspended in 500 mL of binding buffer. Annexin V and PI double staining was accomplished by mixing 5  $\mu$ L of Annexin V with 5  $\mu$ L of PI. The cells were then incubated for 15 min. in the dark at room temperature. FacsCalibur was used to assess cell fluorescence after incubation (BD Biosciences, USA). The results were represented using dot-plot graphs.

## 2.7 Caspase-3 enzyme assay

The level of the apoptotic marker caspase-3 was measured using Invitrogen ELISA Kit Catalog # KHO1091. The procedure of the used kit was performed according to the manufacturer's instructions. Let all components reach room temperature before use. Gently combine all liquid reagents before use. Add 100  $\mu$ L of the standard diluent buffer to the zero standard wells. Add 100  $\mu$ L of standards and controls or diluted samples to the appropriate microtiter wells. Incubate for 2 h at room temperature. Pipette 100  $\mu$ L of caspase-3 (Active) detection antibody solution into each well. Incubate for 1 h at room temperature. Add 100  $\mu$ L anti-rabbit IgG HRP working solution to each well. Prepare the working dilution and incubate for 30 min. at room temperature. Add 100  $\mu$ L of stabilized chromogen to each well. The liquid in the wells will begin to turn blue. Incubate for 30 min. at room temperature and in the dark. Add 100  $\mu$ L of stop solution to each well. The solution in the wells should change from blue to yellow. Read the absorbance of each well at 450 nm. Read

the plate within 2 h after adding the stop solution. Use curve fitting software to generate the standard curve. Read the concentrations for unknown samples and controls from the standard curve.

### 3- Molecular modeling

#### 3.1 Molecular modeling studies

**Table S2.** The docking scores and Lipinski parameters of the thiazole derivatives **3a**, **3c**, **3d**, **3f–q**

| Compound  | Docking score with PI3K active site (PDB: 7PG6) (kcal/mol) | Interactions with PI3K active site                                                                         | Docking score with mTOR active site (PDB: 4JT6) (kcal/mol) | Interactions with mTOR active site                                                                               |
|-----------|------------------------------------------------------------|------------------------------------------------------------------------------------------------------------|------------------------------------------------------------|------------------------------------------------------------------------------------------------------------------|
| <b>3a</b> | -6.7718                                                    | HB (Val851)<br>HB (Asp933)<br>Arene-H (Ile932)                                                             | -7.5046                                                    | HB (Gly2238)<br>Arene-H (Met2345)<br>Arene-H (Ile2356)                                                           |
| <b>3c</b> | -6.2879                                                    | HB (Arg770)<br>Arene-H (Tyr836)<br>Arene-H (Val850)<br>Arene-H (Gln859)                                    | -7.6092                                                    | HB (Trp2239)<br>HB (Val2240)<br>Arene-H (Glu2190)<br>Arene-H (Met2345)                                           |
| <b>3d</b> | -6.9187                                                    | HB (Lys802)<br>HB (Val851)<br>HB (Arg770)<br>Arene-H (Tyr836)<br>Arene-H (Val850)<br>Arene-H (Gln859)      | -7.6802                                                    | HB (Asp2195)<br>HB (Val2240)<br>Arene-H (Ile2237)<br>Arene-H (Met2345)<br>Arene-H (Ile2356)                      |
| <b>3f</b> | -7.1743                                                    | HB (Val851)<br>HB (Asn853)<br>Arene-H (Trp780)                                                             | -8.2853                                                    | HB (Met2345)<br>HB (Leu2192)<br>Arene-H (Trp2239)<br>Arene-H (Glu2190)<br>Arene-H (Met2345)<br>Arene-H (Asp2357) |
| <b>3g</b> | -7.1772                                                    | HB (Val851)<br>Arene-H (Tyr836)<br>Arene-H (Trp780)<br>Arene-H (Asn853)                                    | -8.5718                                                    | HB (Met2345)<br>Arene-H (Glu2190)<br>Arene-H (Met2345)<br>Arene-H (Asp2357)<br>Arene-H (Ile2356)                 |
| <b>3h</b> | -7.4789                                                    | HB (Val851)<br>Arene-H (Tyr836)<br>Arene-H (Trp780)<br>Arene-H (Lys802)<br>Arene-H (Asn853)                | -8.2342                                                    | HB (Gly2238)<br>Arene-H (Glu2190)<br>Arene-H (Met2345)                                                           |
| <b>3i</b> | -7.5763                                                    | HB (Val851)<br>HB (Asn853)<br>Arene-H (Lys802)<br>Arene-H (Ser854)<br>Arene-H (Trp780)<br>Arene-H (Lys802) | -8.7294                                                    | HB (Gly2238)<br>HB (Met2345)<br>HB (Thr2245)<br>Arene-H (Met2345)<br>Arene-H (Glu2190)                           |

|                  |         |                                                                                                            |         |                                                                                                                  |
|------------------|---------|------------------------------------------------------------------------------------------------------------|---------|------------------------------------------------------------------------------------------------------------------|
| <b>3j</b>        | -7.3285 | HB (Ser851)<br>Arene-H (Trp780)<br>Arene-H (Ile932)                                                        | -8.3727 | HB (Gly2238)<br>HB (Val2240)<br>Arene-H (Glu2190)<br>Arene-H (Ile2237)<br>Arene-H (Met2345)<br>Arene-H (Ile2356) |
| <b>3k</b>        | -8.1237 | HB (Val851)<br>HB (Gln859)<br>Arene-H (Trp780)<br>Arene-H (Lys802)<br>Arene-H (Asp805)<br>Arene-H (Val850) | -8.5287 | HB (Gly2238)<br>Arene-H (Glu2190)<br>Arene-H (Ile2237)<br>Arene-H (Met2345)                                      |
| <b>3l</b>        | -7.6351 | Arene-H (Tyr836)<br>Arene-H (Ser774)<br>Arene-H (Ala775)<br>Arene-H (Lys802)<br>Arene-H (Val850)           | -8.5391 | HB (Val2240)<br>Arene-H (Ile2237)<br>Arene-H (Trp2239)                                                           |
| <b>3m</b>        | -7.9815 | HB (Val851)<br>Arene-H (Ser774)<br>Arene-H (Trp780)<br>Arene-H (Asn853)<br>Arene-H (Ser854)                | -8.5556 | HB (Val2240)<br>HB (Gly2238)<br>Arene-H (Glu2190)<br>Arene-H (Ile2356)                                           |
| <b>3n</b>        | -7.8469 | HB (Val851)<br>Arene-H (Arg770)<br>Arene-H (Val850)<br>Arene-H (Gln859)                                    | -8.8540 | HB (Gly2238)<br>HB (Thr2245)<br>Arene-H (Glu2190)                                                                |
| <b>3o</b>        | -7.3411 | Arene-H (Tyr836)<br>Arene-H (Trp780)<br>Arene-H (Val850)                                                   | -8.7115 | HB (Val2240)<br>HB (Gly2238)<br>Arene-H (Glu2190)<br>Arene-H (Ile2356)                                           |
| <b>3p</b>        | -7.9445 | HB (Val851)<br>Arene-H (Trp780)<br>Arene-H (Asn853)<br>Arene-H (Ser854)                                    | -8.8438 | HB (Gly2238)<br>Arene-H (Glu2190)                                                                                |
| <b>3q</b>        | -6.7034 | HB (Val851)<br>Arene-H (Val850)<br>Arene-H (Gln859)<br>Arene-H (Ile932)                                    | -7.6112 | HB (Glu2190)<br>HB (Val2240)<br>Arene-H (Glu2190)<br>Arene-H (Ile2237)                                           |
| <b>Alpelisib</b> | -8.1121 | HB (Ser854)<br>HB (Gln859)<br>HB (Lys802)<br>HB (Val851)                                                   |         |                                                                                                                  |

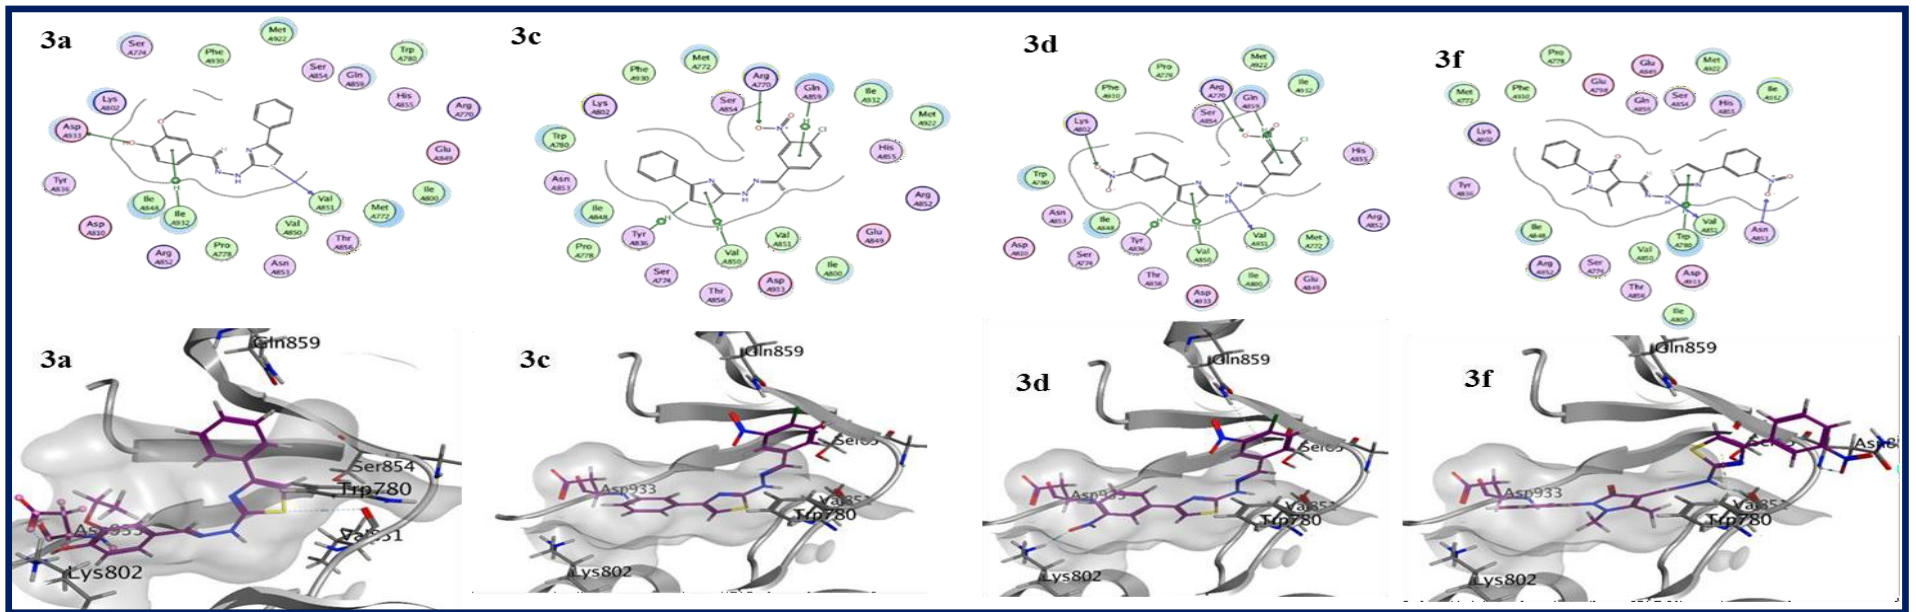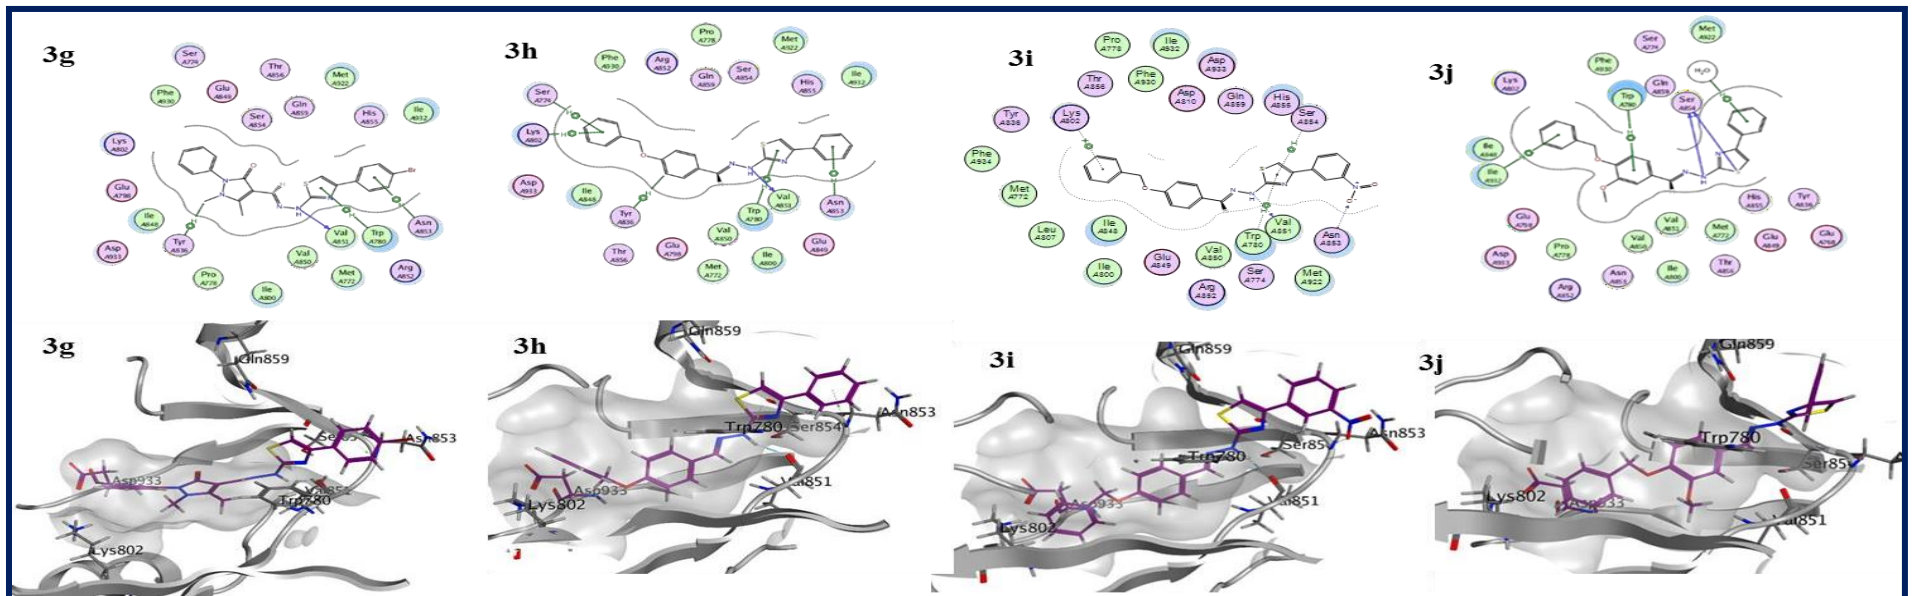

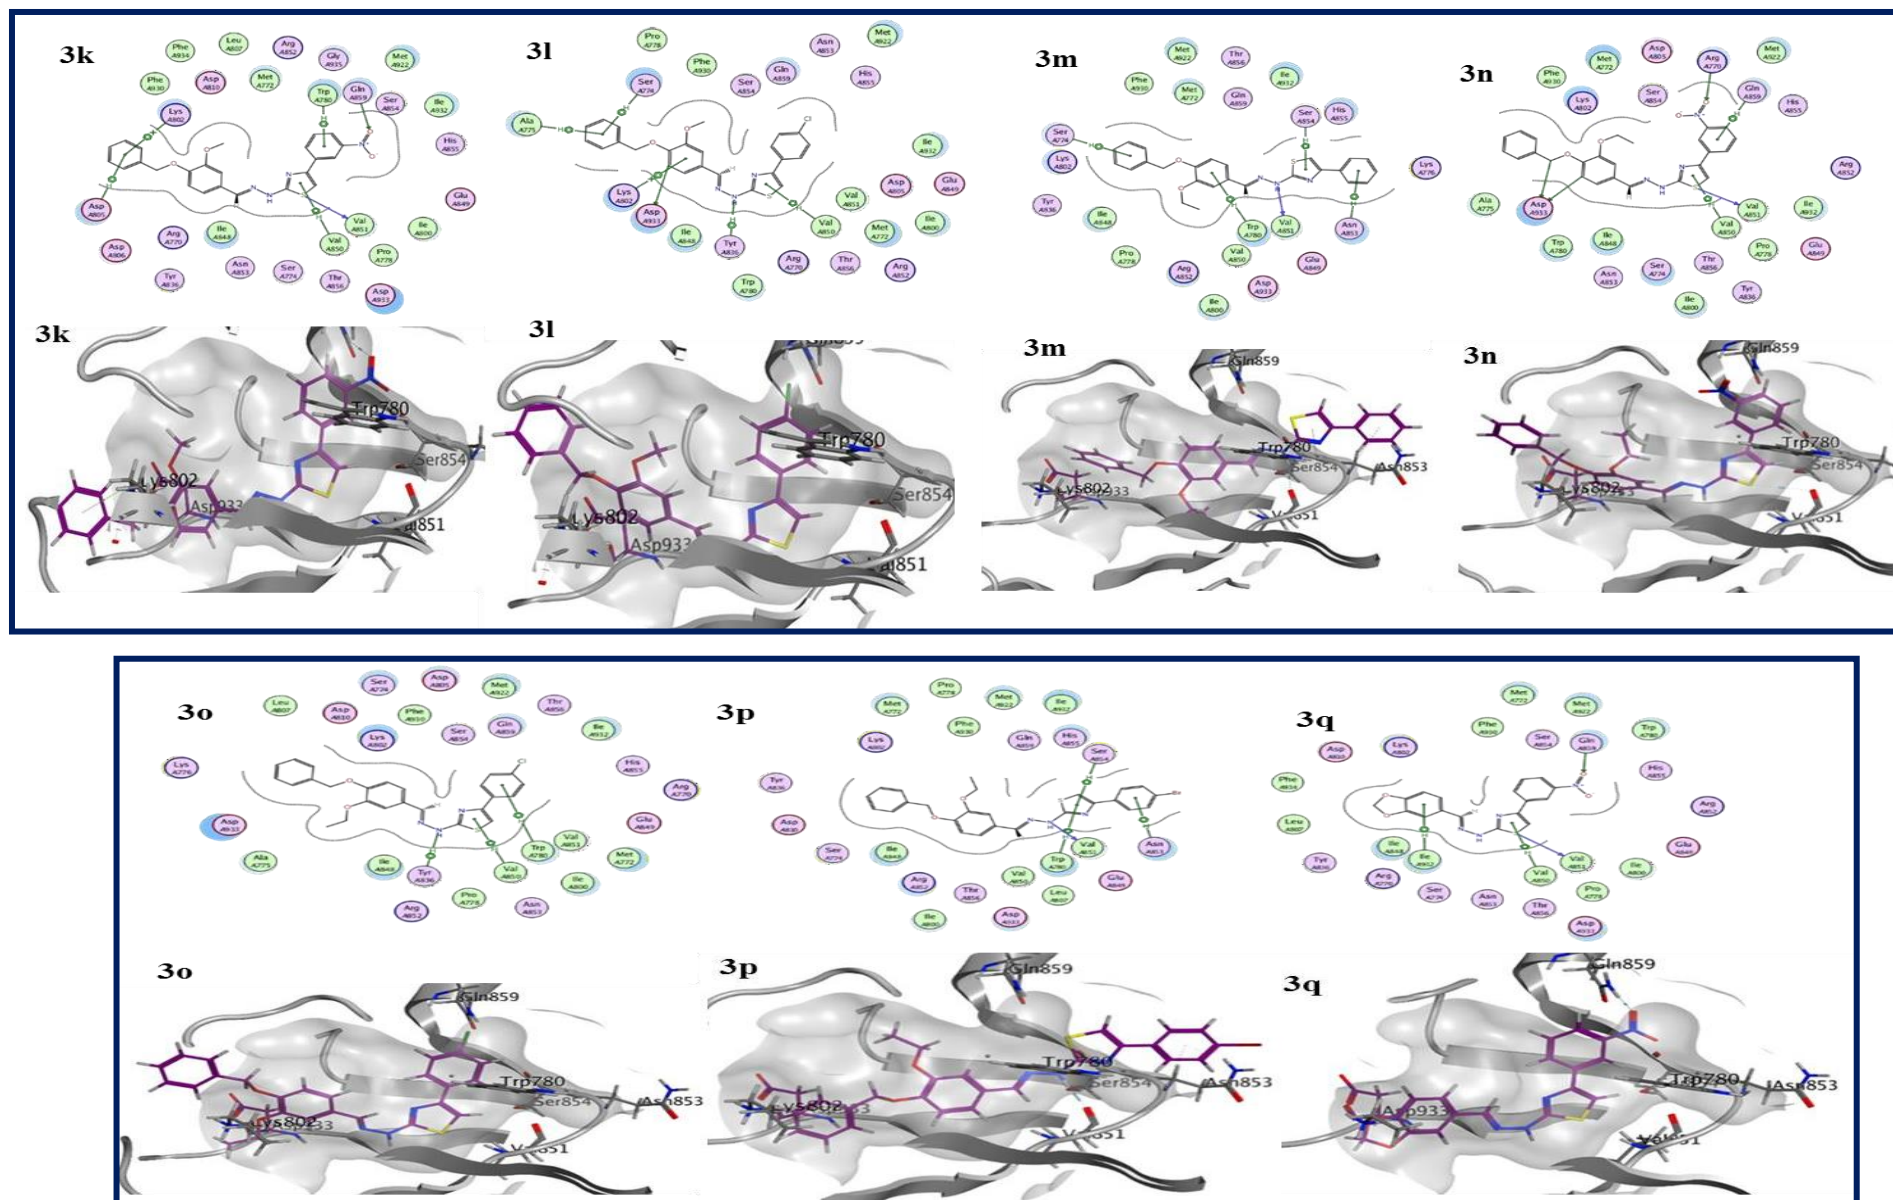

**Fig. S1.** 2D and 3D interactions of the synthesized derivatives with PI3K active site (PDB: 7PG6).



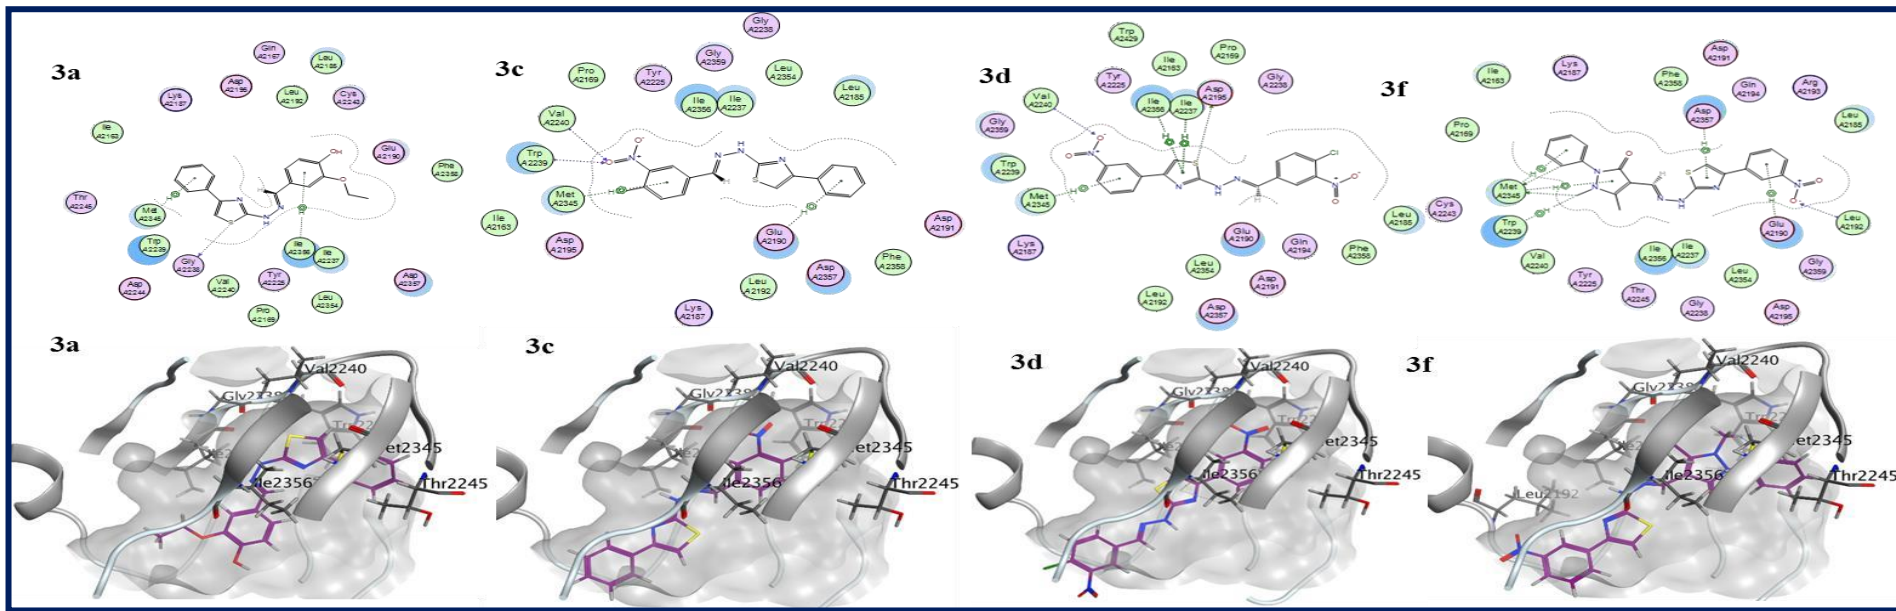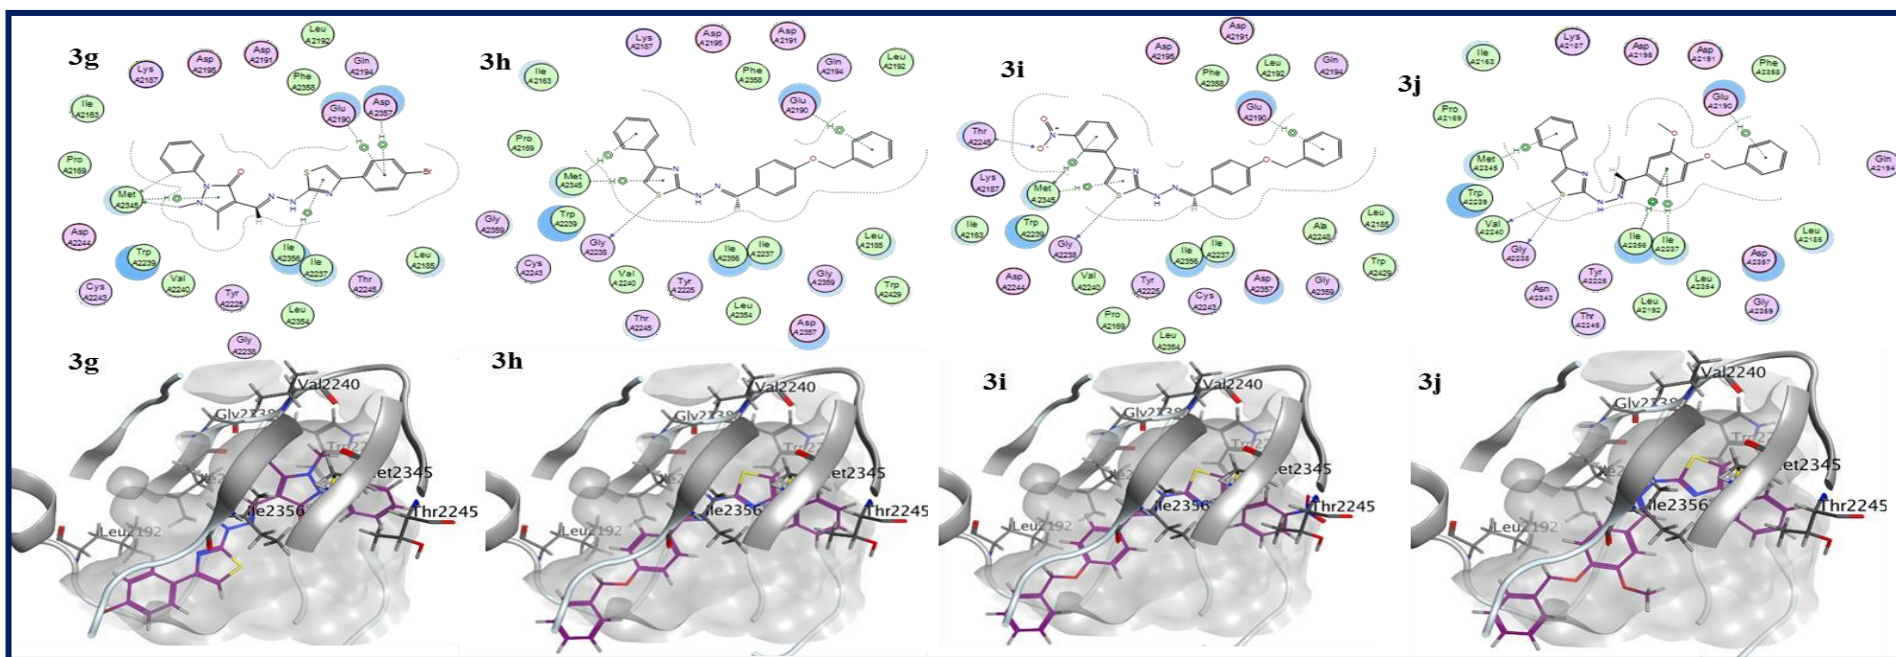



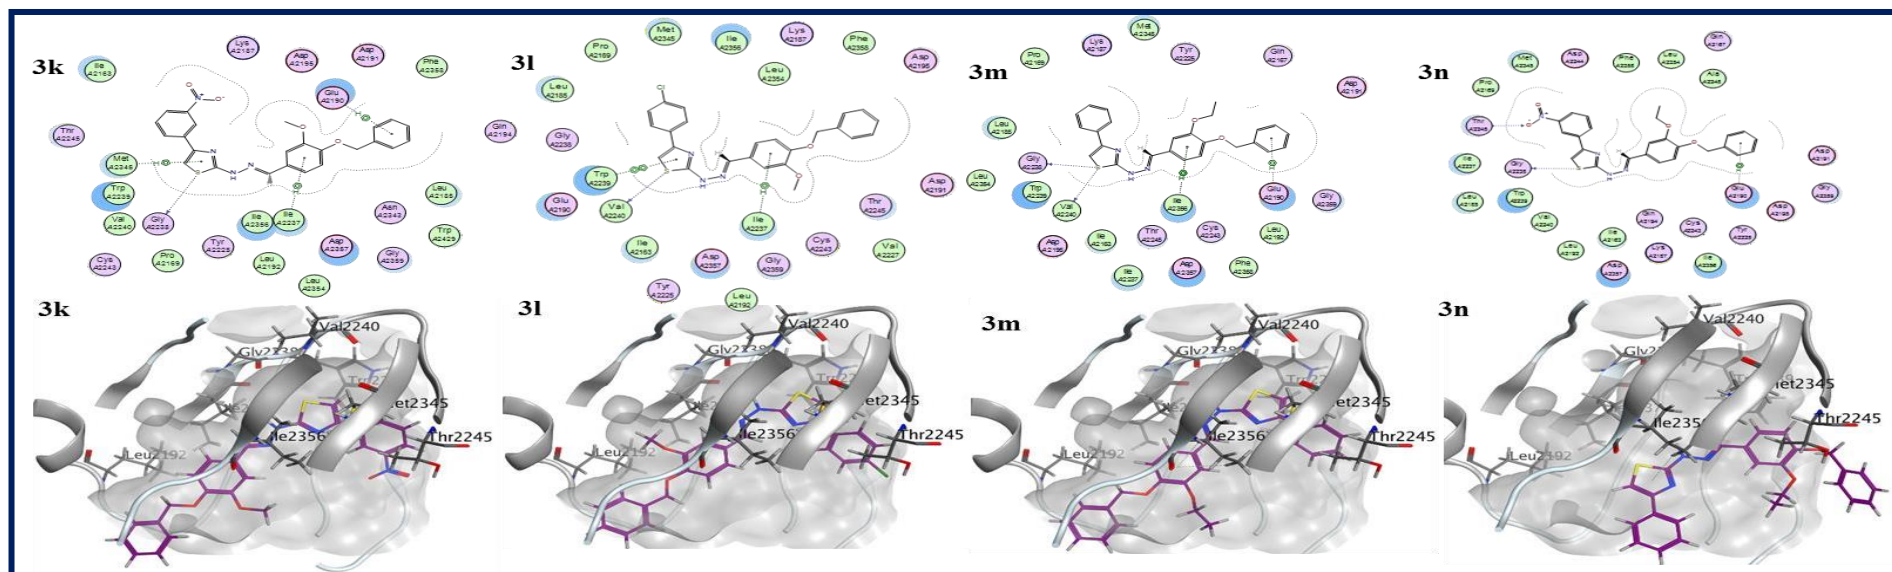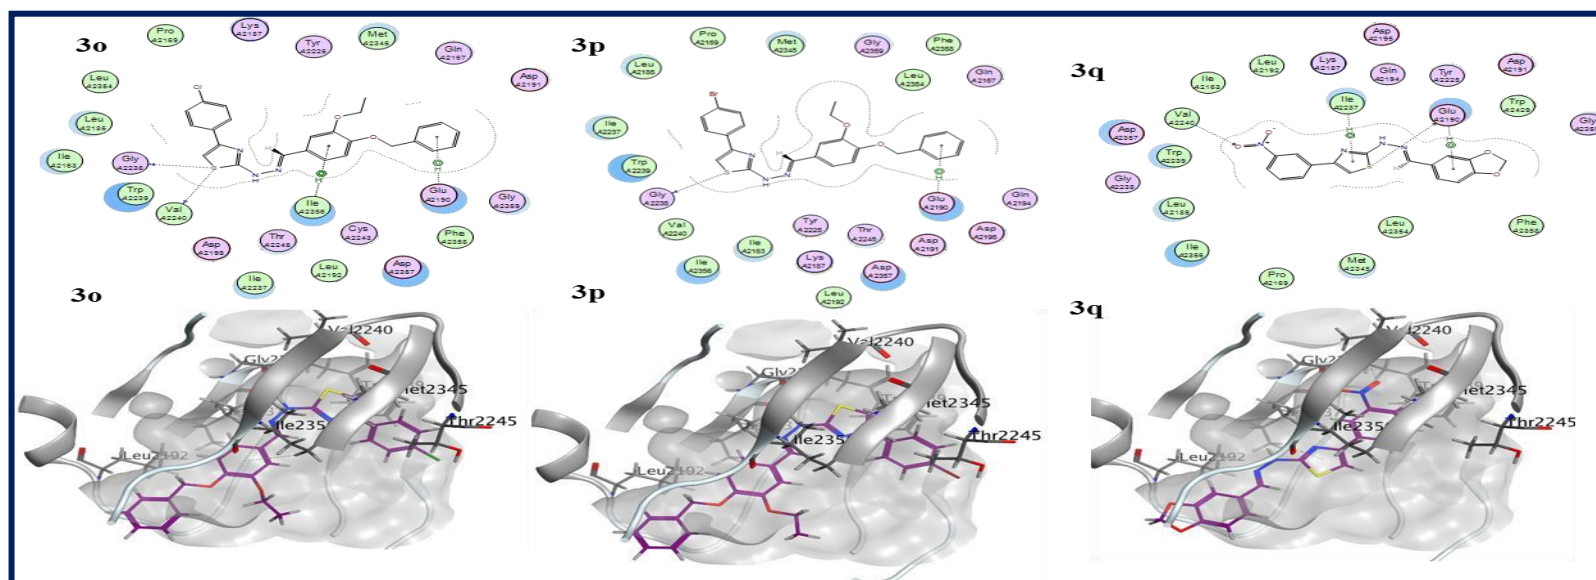

Fig. S2. 2D and 3D interactions of the synthesized derivatives with mTOR active site (PDB: 4JT6).

### 3.2 Prediction of physicochemical, pharmacokinetic, and ADME properties

**Table S3.** The physicochemical and ADME properties of the target molecules.

| Compd.            | MW (g/mol) <500 | #H-bond acceptors <10 | #H-bond donors <5 | Log P o/w <5 | Lipinski violations | TPSA (Å <sup>2</sup> ) <140 | Rotatable bonds <10 | GI   | BBB | BA Score |
|-------------------|-----------------|-----------------------|-------------------|--------------|---------------------|-----------------------------|---------------------|------|-----|----------|
| <b>3a</b>         | 460.51          | 6                     | 1                 | 4.12         | 0                   | 129.8                       | 9                   | Low  | No  | 0.55     |
| <b>3b</b>         | 339.41          | 4                     | 2                 | 3.72         | 0                   | 94.98                       | 6                   | High | No  | 0.55     |
| <b>3c</b>         | 358.8           | 4                     | 1                 | 3.47         | 0                   | 111.34                      | 5                   | High | No  | 0.55     |
| <b>3d</b>         | 403.8           | 6                     | 1                 | 2.76         | 0                   | 157.16                      | 6                   | Low  | No  | 0.55     |
| <b>3e</b>         | 393.25          | 4                     | 1                 | 4.02         | 0                   | 111.34                      | 5                   | Low  | No  | 0.55     |
| <b>3f</b>         | 434.47          | 5                     | 1                 | 3.19         | 0                   | 138.27                      | 6                   | Low  | No  | 0.55     |
| <b>3g</b>         | 468.37          | 3                     | 1                 | 4.53         | 0                   | 92.45                       | 5                   | High | No  | 0.55     |
| <b>3h</b>         | 385.48          | 3                     | 1                 | 4.97         | 0                   | 74.75                       | 7                   | High | No  | 0.55     |
| <b>3i</b>         | 430.48          | 5                     | 1                 | 4.41         | 0                   | 120.57                      | 8                   | Low  | No  | 0.55     |
| <b>3j</b>         | 415.51          | 4                     | 1                 | 4.96         | 0                   | 83.98                       | 8                   | High | No  | 0.55     |
| <b>3k</b>         | 460.51          | 6                     | 1                 | 4.12         | 0                   | 129.8                       | 9                   | Low  | No  | 0.55     |
| <b>3l</b>         | 449.95          | 4                     | 1                 | 5.48         | 0                   | 83.98                       | 8                   | High | No  | 0.55     |
| <b>3m</b>         | 429.53          | 4                     | 1                 | 5.27         | 0                   | 83.98                       | 9                   | High | No  | 0.55     |
| <b>3n</b>         | 474.53          | 6                     | 1                 | 4.51         | 0                   | 129.8                       | 10                  | Low  | No  | 0.55     |
| <b>3o</b>         | 463.98          | 4                     | 1                 | 5.77         | 0                   | 83.98                       | 9                   | Low  | No  | 0.55     |
| <b>3p</b>         | 508.43          | 4                     | 1                 | 5.94         | 1                   | 83.98                       | 9                   | Low  | No  | 0.55     |
| <b>3q</b>         | 368.37          | 6                     | 1                 | 3.04         | 0                   | 129.8                       | 5                   | Low  | No  | 0.55     |
| <b>Alpelisib</b>  | 441.47          | 7                     | 2                 | 3.03         | 0                   | 129.45                      | 7                   | Low  | No  | 0.55     |
| <b>Dactolisib</b> | 469.54          | 4                     | 0                 | 4.74         | 0                   | 76.5                        | 3                   | High | No  | 0.55     |

### 3.3 ProTox-3.0 - Prediction of Toxicity of chemicals

|                                            |                                                                                       |                  | <b>3b</b>         |                    | <b>3e</b>         |                    |
|--------------------------------------------|---------------------------------------------------------------------------------------|------------------|-------------------|--------------------|-------------------|--------------------|
| <b>Classification</b>                      | <b>Target</b>                                                                         | <b>Shorthand</b> | <b>Prediction</b> | <b>Probability</b> | <b>Prediction</b> | <b>Probability</b> |
| Organ toxicity                             | Neurotoxicity                                                                         | neuro            | Inactive          | 0.77               | Inactive          | 0.53               |
| Organ toxicity                             | Cardiotoxicity                                                                        | cardio           | Inactive          | 0.57               | Inactive          | 0.71               |
| Toxicity end points                        | Cytotoxicity                                                                          | cyto             | Inactive          | 0.65               | Inactive          | 0.68               |
| Toxicity end points                        | Clinical toxicity                                                                     | clinical         | Inactive          | 0.61               | Inactive          | 0.64               |
| Toxicity end points                        | Nutritional toxicity                                                                  | nutri            | Inactive          | 0.54               | Inactive          | 0.50               |
| Tox21-Nuclear receptor signalling pathways | Androgen Receptor (AR)                                                                | nr_ar            | Inactive          | 0.96               | Inactive          | 0.98               |
| Tox21-Nuclear receptor signalling pathways | Androgen Receptor Ligand Binding Domain (AR-LBD)                                      | nr_ar_lbd        | Inactive          | 0.98               | Inactive          | 0.97               |
| Tox21-Nuclear receptor signalling pathways | Estrogen Receptor Alpha (ER)                                                          | nr_er            | Inactive          | 0.70               | Inactive          | 0.78               |
| Tox21-Nuclear receptor signalling pathways | Estrogen Receptor Ligand Binding Domain (ER-LBD)                                      | nr_er_lbd        | Inactive          | 0.93               | Inactive          | 0.63               |
| Tox21-Nuclear receptor signalling pathways | Peroxisome Proliferator Activated Receptor Gamma (PPAR-Gamma)                         | nr_ppar_gamma    | Inactive          | 0.89               | Inactive          | 0.92               |
| Tox21-Stress response pathways             | Nuclear factor (erythroid-derived 2)-like 2/antioxidant responsive element (nrf2/ARE) | sr_are           | Inactive          | 0.85               | Inactive          | 0.75               |
| Tox21-Stress response pathways             | Heat shock factor response element (HSE)                                              | sr_hse           | Inactive          | 0.85               | Inactive          | 0.75               |
| Tox21-Stress response pathways             | Phosphoprotein (Tumor Suppressor) p53                                                 | sr_p53           | Inactive          | 0.78               | Inactive          | 0.73               |
| Tox21-Stress response pathways             | ATPase family AAA domain-containing protein 5 (ATAD5)                                 | sr_atad5         | Inactive          | 0.76               | Inactive          | 0.73               |
| Molecular Initiating Events                | Thyroid hormone receptor alpha (THR $\alpha$ )                                        | mie_thr_alpha    | Inactive          | 0.73               | Inactive          | 0.83               |
| Molecular Initiating Events                | Thyroid hormone receptor beta (THR $\beta$ )                                          | mie_thr_beta     | Inactive          | 0.75               | Inactive          | 0.85               |
| Molecular Initiating Events                | Ryanodine receptor (RYR)                                                              | mie_ryr          | Inactive          | 0.82               | Inactive          | 0.89               |
| Molecular Initiating Events                | GABA receptor (GABAR)                                                                 | mie_gabar        | Inactive          | 0.76               | Inactive          | 0.86               |
| Molecular Initiating Events                | Glutamate N-methyl-D-aspartate receptor (NMDAR)                                       | mie_nmdar        | Inactive          | 0.94               | Inactive          | 0.95               |
| Molecular Initiating Events                | alpha-amino-3-hydroxy-5-methyl-4-isoxazolepropionate receptor (AMPA)                  | mie_ampar        | Inactive          | 0.98               | Inactive          | 0.99               |

|                             |                                                 |            |          |      |          |      |
|-----------------------------|-------------------------------------------------|------------|----------|------|----------|------|
| Molecular Initiating Events | Kainate receptor (KAR)                          | mie_kar    | Inactive | 0.97 | Inactive | 1    |
| Molecular Initiating Events | Achetylcholinesterase (AChE)                    | mie_ache   | Inactive | 0.86 | Inactive | 0.80 |
| Molecular Initiating Events | Constitutive androstane receptor (CAR)          | mie_car    | Inactive | 1    | Inactive | 1    |
| Molecular Initiating Events | Pregnane X receptor (PXR)                       | mie_pxr    | Inactive | 0.83 | Inactive | 0.70 |
| Molecular Initiating Events | NADH-quinone oxidoreductase (NADHOX)            | mie_nadhox | Inactive | 0.93 | Inactive | 0.98 |
| Molecular Initiating Events | Voltage gated sodium channel (VGSC)             | mie_vgsc   | Inactive | 0.73 | Inactive | 0.54 |
| Molecular Initiating Events | Na <sup>+</sup> /I <sup>-</sup> symporter (NIS) | mie_nis    | Inactive | 0.80 | Inactive | 0.74 |
| Metabolism                  | Cytochrome CYP1A2                               | CYP1A2     | Inactive | 0.78 | Inactive | 0.52 |
| Metabolism                  | Cytochrome CYP2C19                              | CYP2C19    | Inactive | 0.66 | Inactive | 0.53 |
| Metabolism                  | Cytochrome CYP2D6                               | CYP2D6     | Inactive | 0.70 | Inactive | 0.64 |
| Metabolism                  | Cytochrome CYP2E1                               | CYP2E1     | Inactive | 0.99 | Inactive | 0.98 |

# 4- <sup>1</sup>H NMR and <sup>13</sup>C NMR spectra of the new derivatives.

## Compound 3a

Yara Sayed\_H\_Ethoxy-phenyl

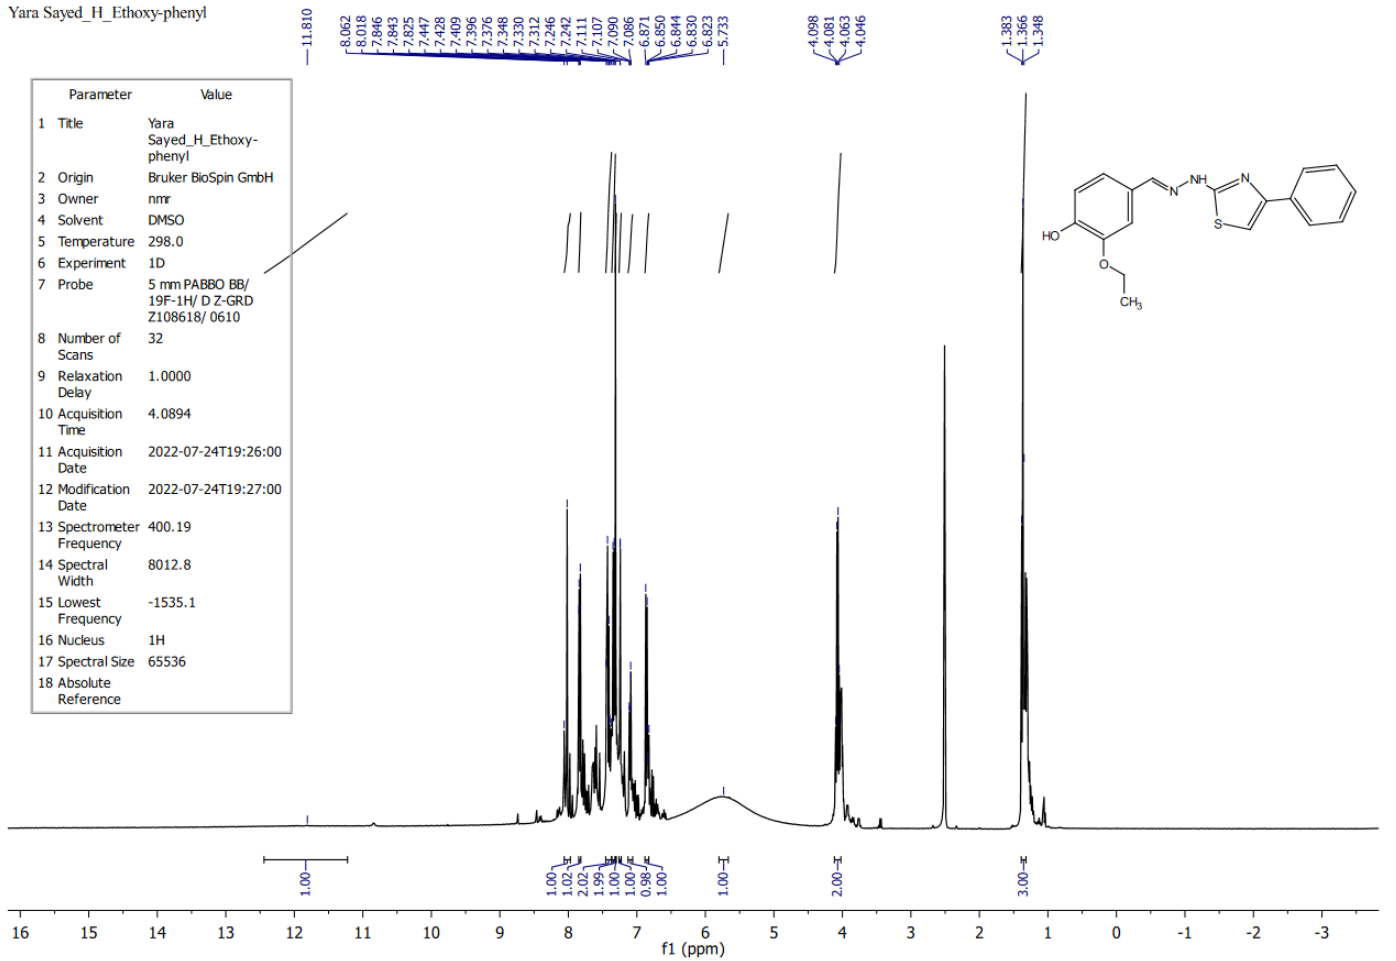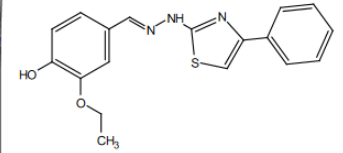

Yara Sayed\_C\_Ethoxy-phenyl

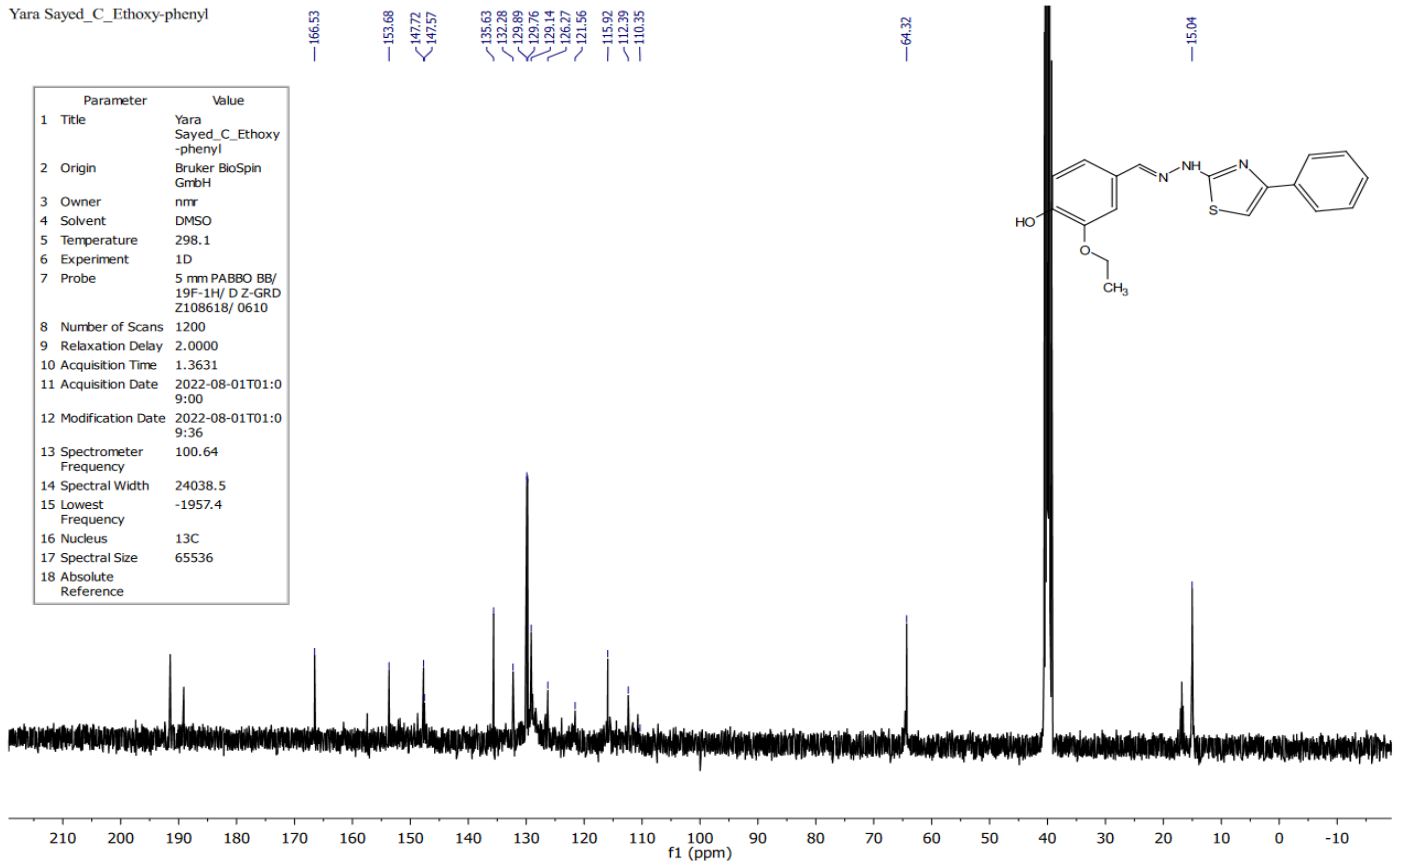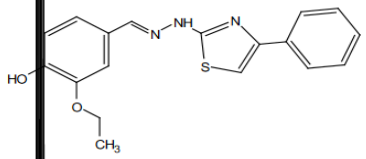

# Compound 3b

Rasha Ahmed\_H\_Ethoxy-3-NO2

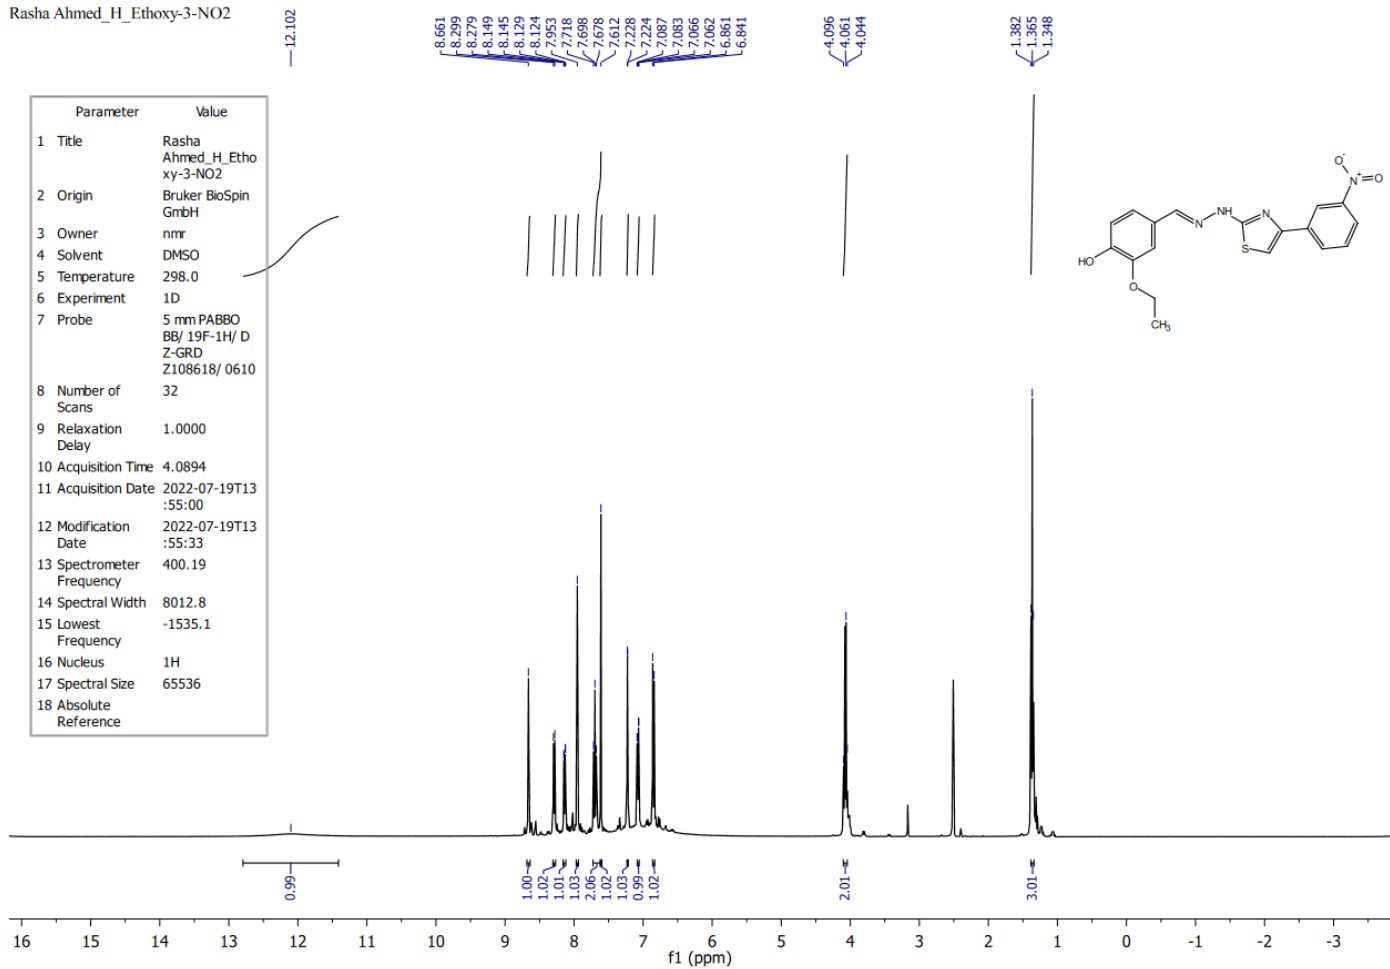

Rasha Ahmed\_C\_Ethoxy-3-NO2.10.fid

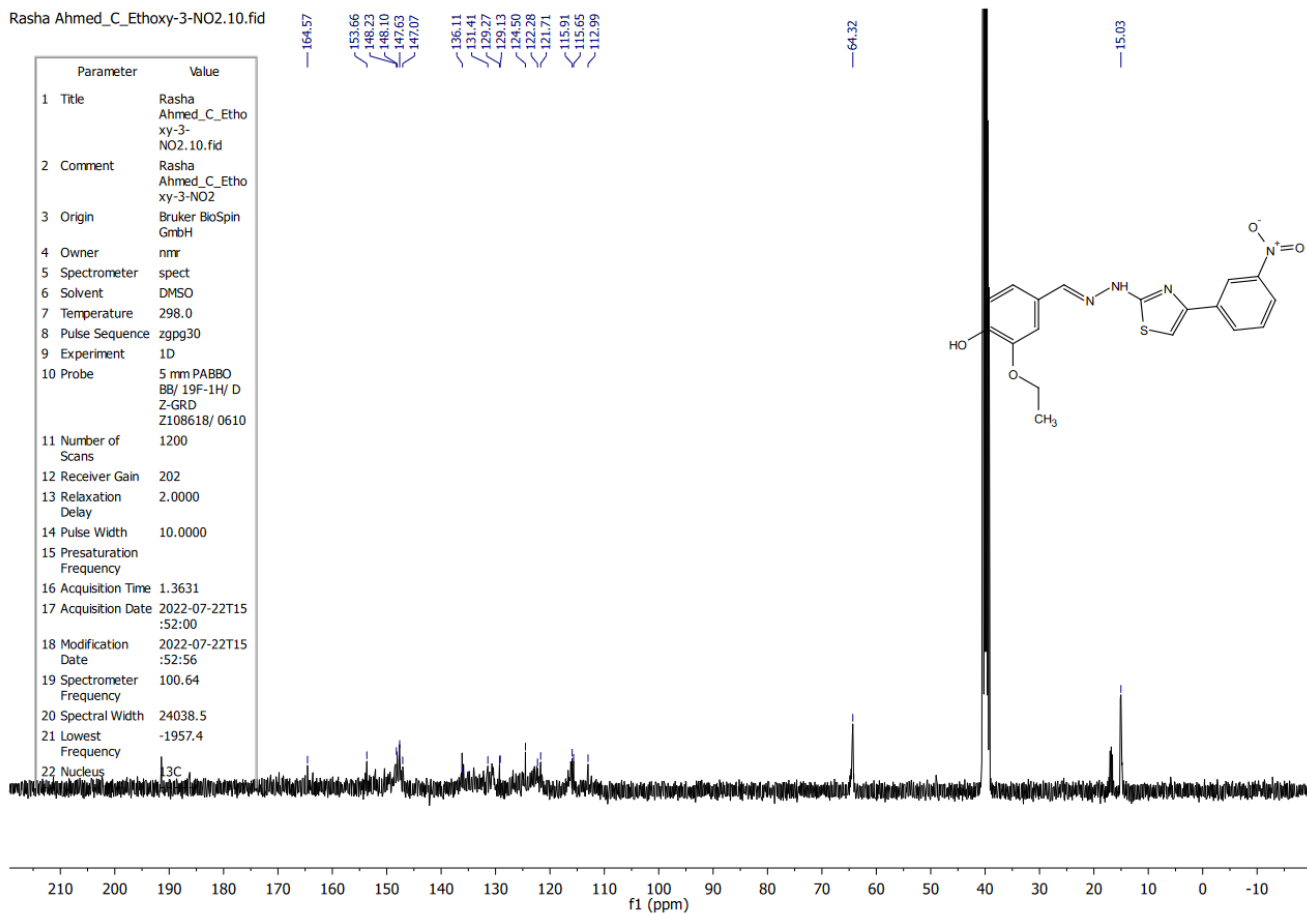

# Compound 3c

Samar Ibrahim\_H\_Cl-N-ph

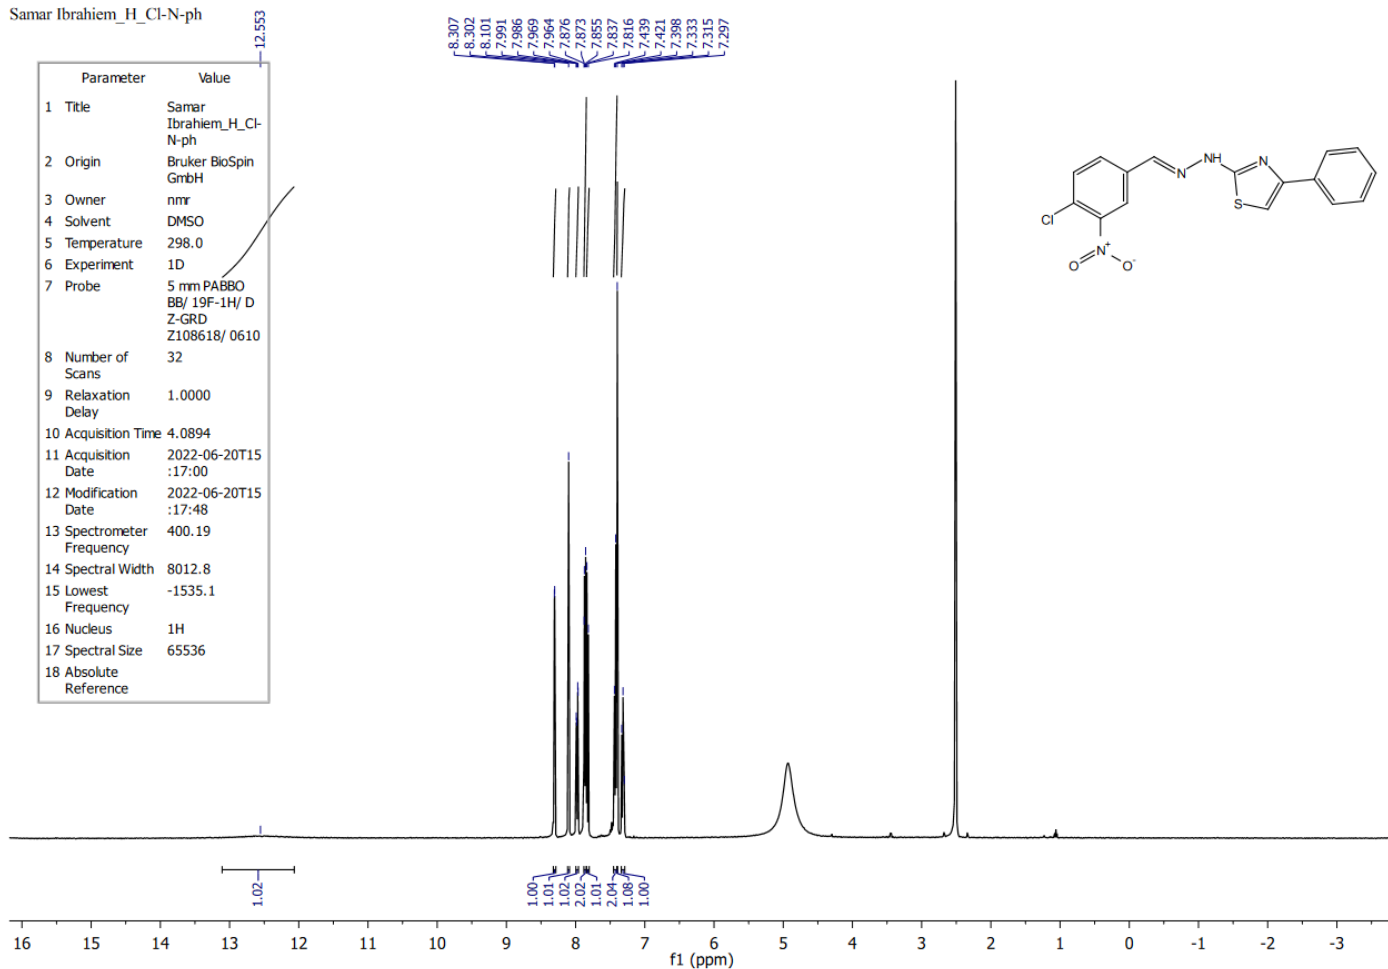

Samar Ibrahim\_C\_Cl-N-ph

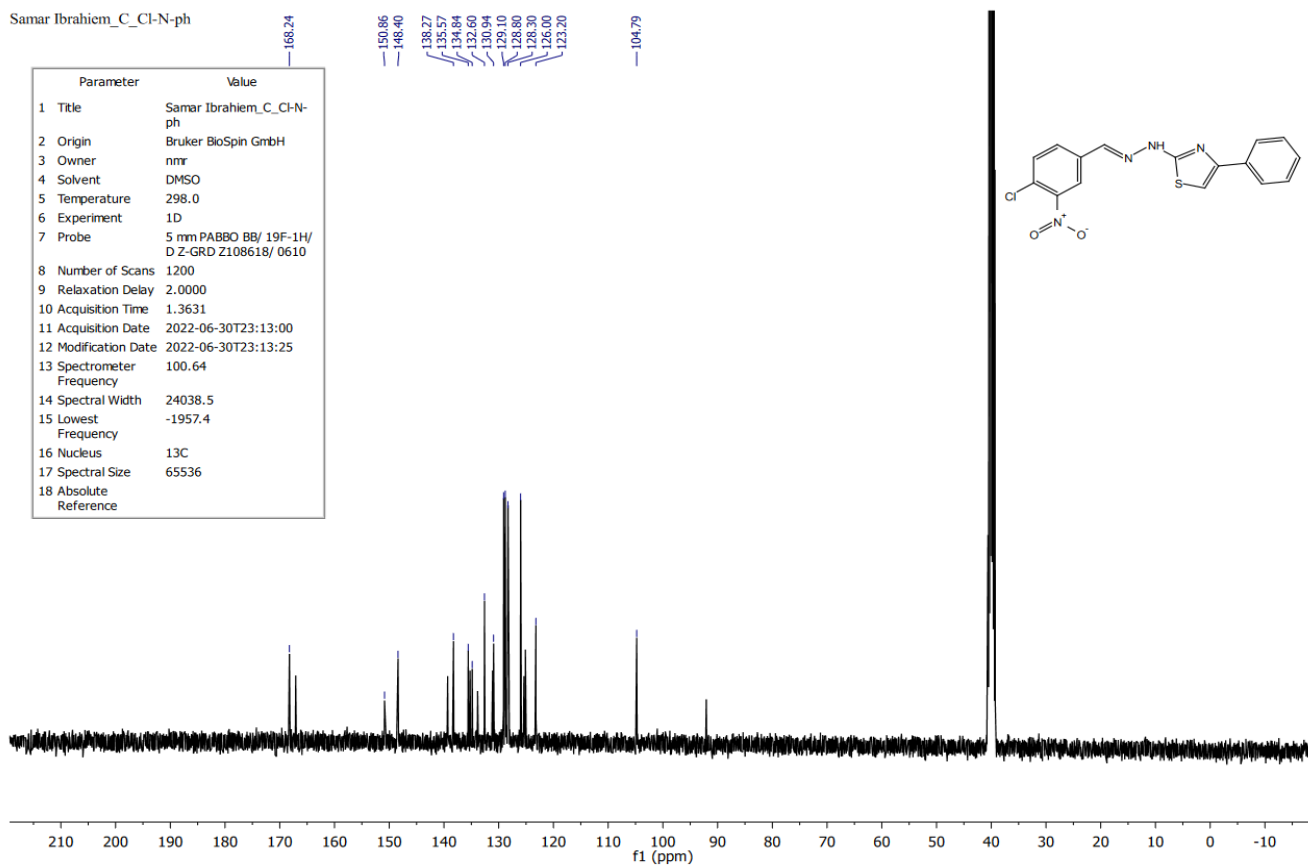

# Compound 3d

Samar Ibrahim\_H\_Cl-N-3NO2

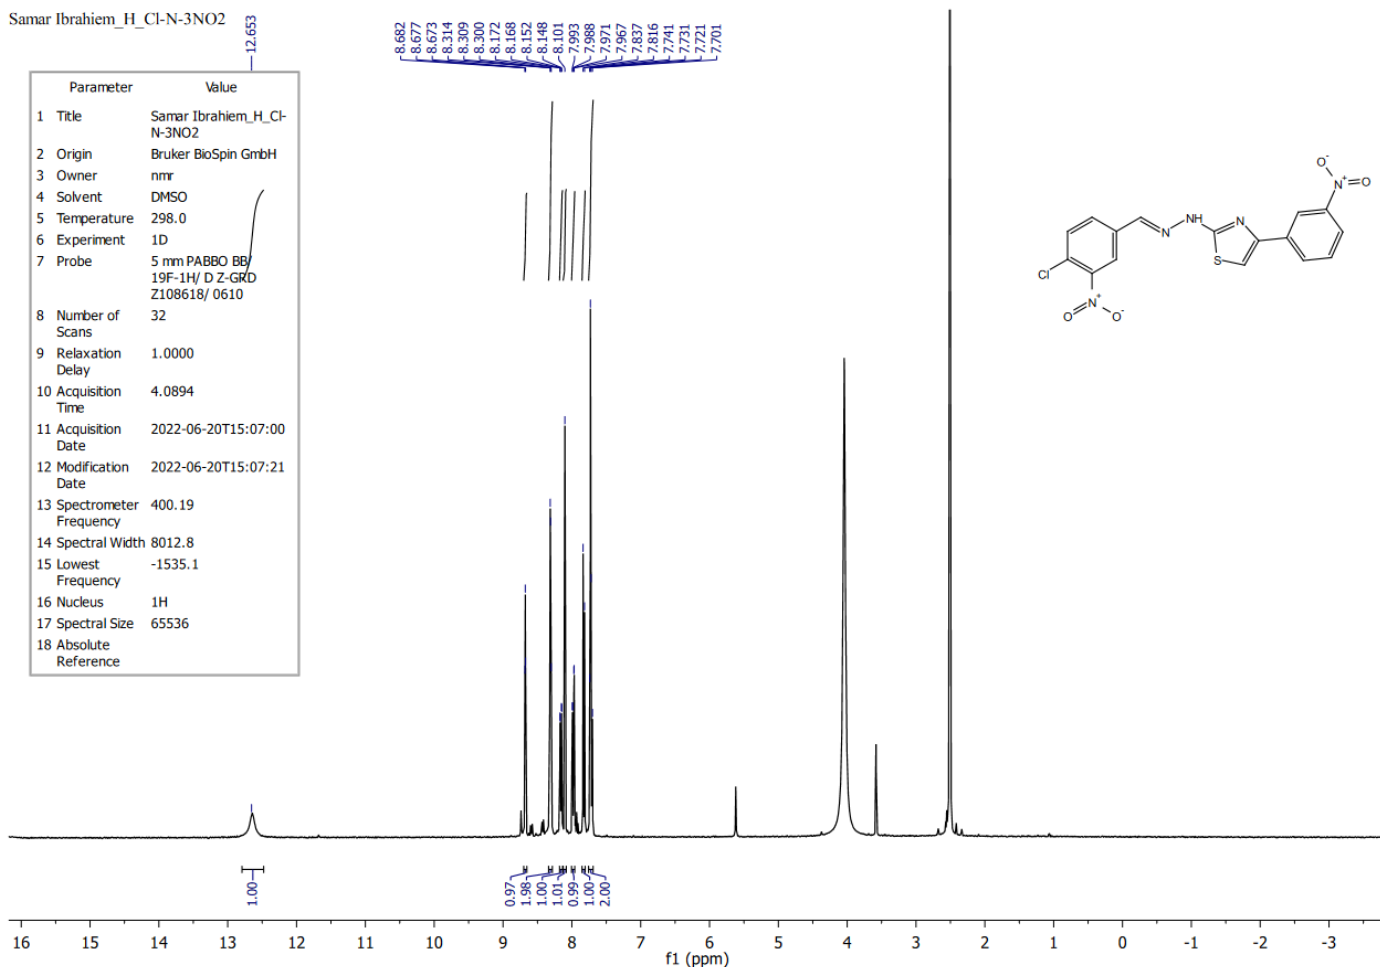

Samar Ibrahim\_C\_Cl-N-3NO2

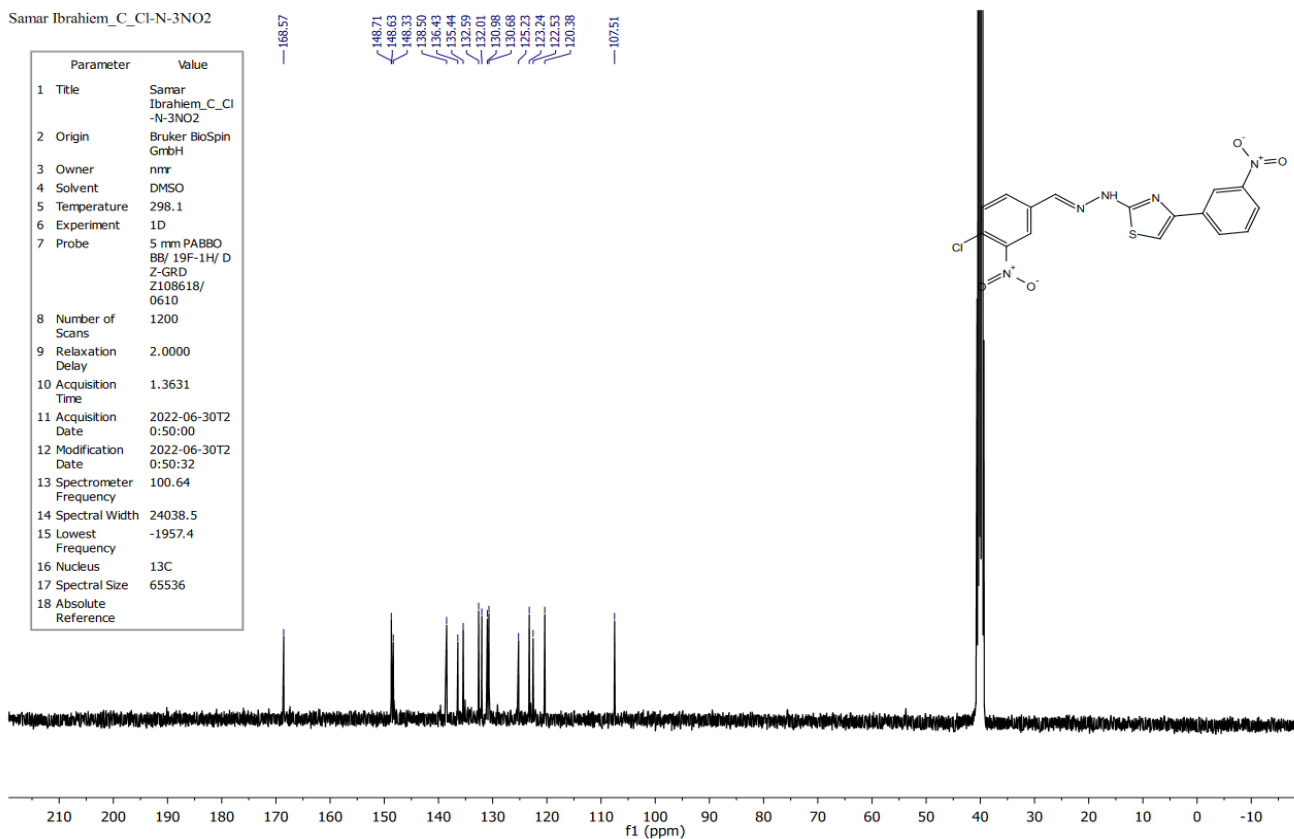



# Compound 3e

Samar Ibrahim\_H\_Cl-N-4Cl

| Parameter                 | Value                                       |
|---------------------------|---------------------------------------------|
| 1 Title                   | Samar Ibrahim_H_Cl-N-4Cl                    |
| 2 Origin                  | Bruker BioSpin GmbH                         |
| 3 Owner                   | nmr                                         |
| 4 Solvent                 | DMSO                                        |
| 5 Temperature             | 298.1                                       |
| 6 Experiment              | 1D                                          |
| 7 Probe                   | 5 mm PABBO BB/19F-1H/ D Z-GRD Z108618/ 0610 |
| 8 Number of Scans         | 32                                          |
| 9 Relaxation Delay        | 1.0000                                      |
| 10 Acquisition Time       | 4.0894                                      |
| 11 Acquisition Date       | 2022-06-20T15:12:00                         |
| 12 Modification Date      | 2022-06-20T15:12:35                         |
| 13 Spectrometer Frequency | 400.19                                      |
| 14 Spectral Width         | 8012.8                                      |
| 15 Lowest Frequency       | -1535.1                                     |
| 16 Nucleus                | <sup>1</sup> H                              |
| 17 Spectral Size          | 65536                                       |
| 18 Absolute Reference     |                                             |

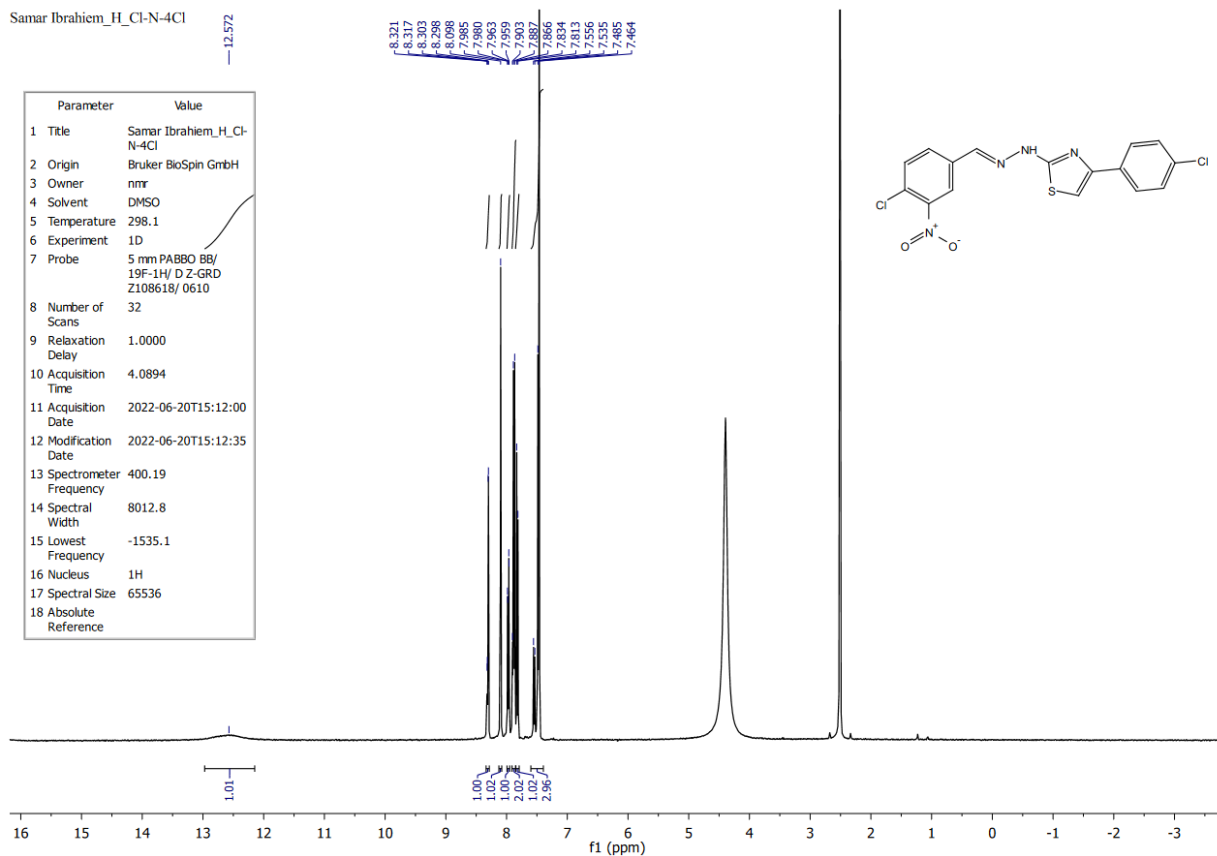

Samar Ibrahim\_C\_Cl-N-4Cl

| Parameter                 | Value                                       |
|---------------------------|---------------------------------------------|
| 1 Title                   | Samar Ibrahim_C_Cl-N-4Cl                    |
| 2 Origin                  | Bruker BioSpin GmbH                         |
| 3 Owner                   | nmr                                         |
| 4 Solvent                 | DMSO                                        |
| 5 Temperature             | 298.1                                       |
| 6 Experiment              | 1D                                          |
| 7 Probe                   | 5 mm PABBO BB/19F-1H/ D Z-GRD Z108618/ 0610 |
| 8 Number of Scans         | 1200                                        |
| 9 Relaxation Delay        | 2.0000                                      |
| 10 Acquisition Time       | 1.3631                                      |
| 11 Acquisition Date       | 2022-06-30T22:01:00                         |
| 12 Modification Date      | 2022-06-30T22:01:59                         |
| 13 Spectrometer Frequency | 100.64                                      |
| 14 Spectral Width         | 24038.5                                     |
| 15 Lowest Frequency       | -1957.4                                     |
| 16 Nucleus                | <sup>13</sup> C                             |
| 17 Spectral Size          | 65536                                       |
| 18 Absolute Reference     |                                             |

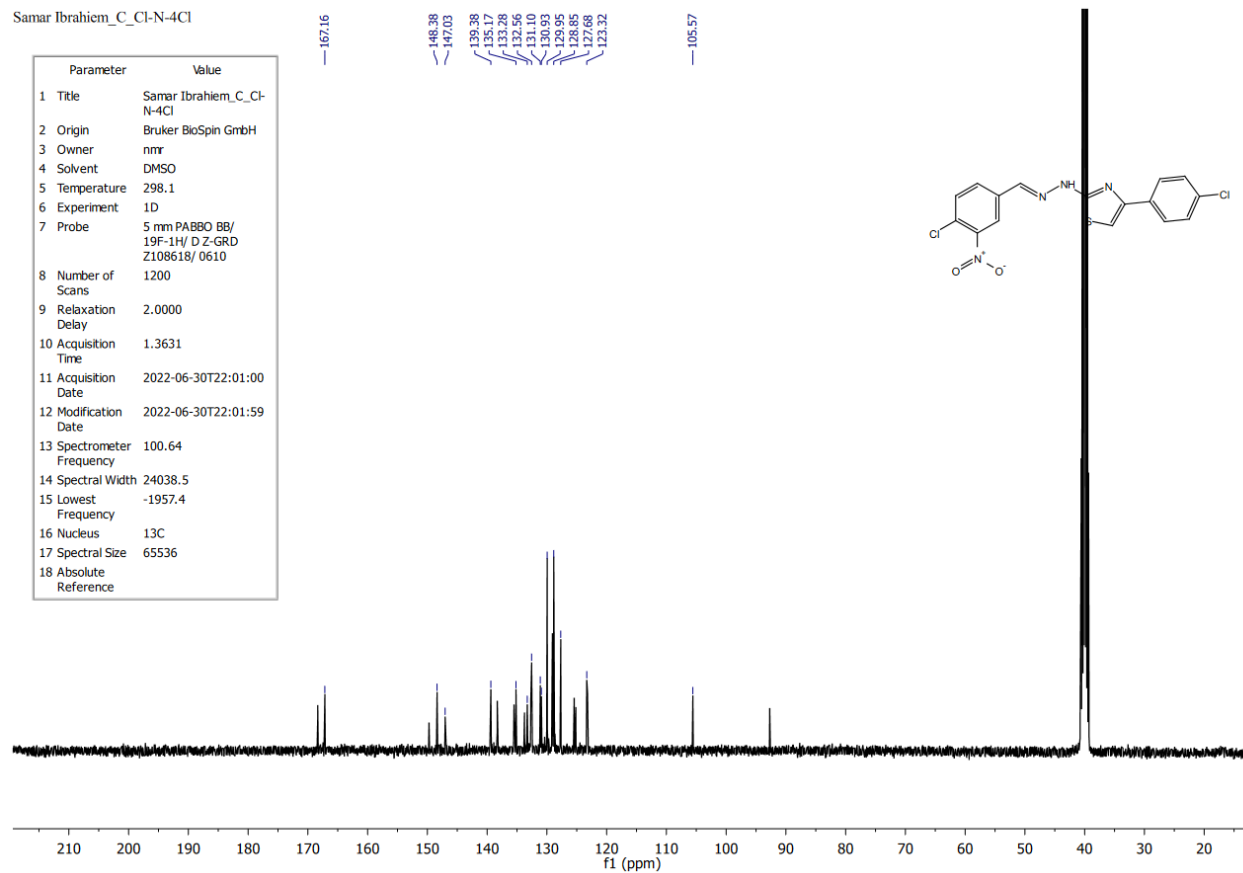

# Compound 3f

Samar Ibrahim\_H\_Anti-NO2

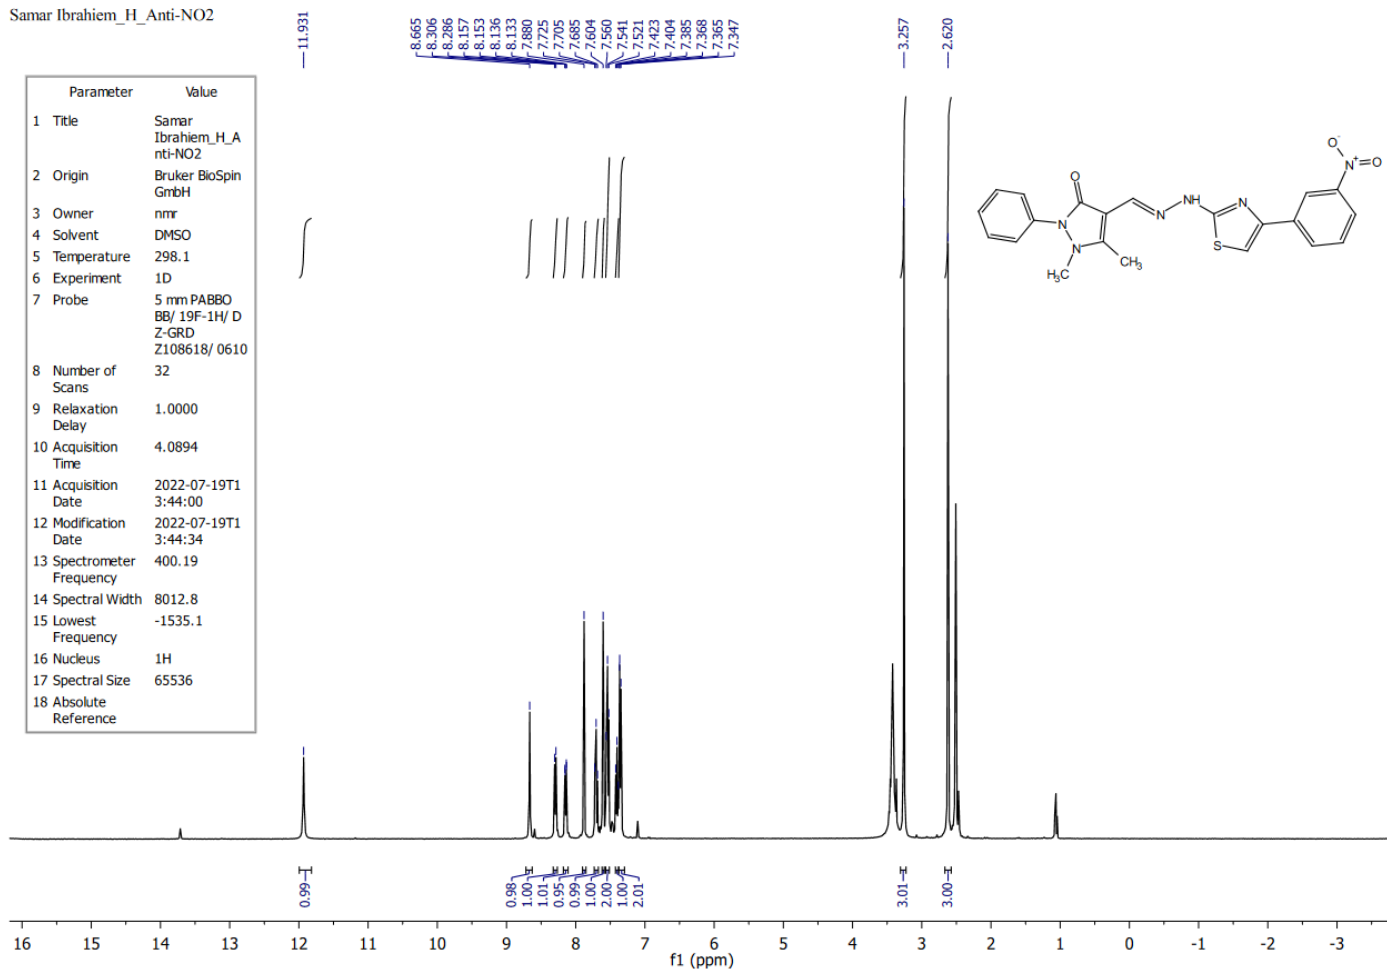

Samar Ibrahim\_C\_Anti-NO2

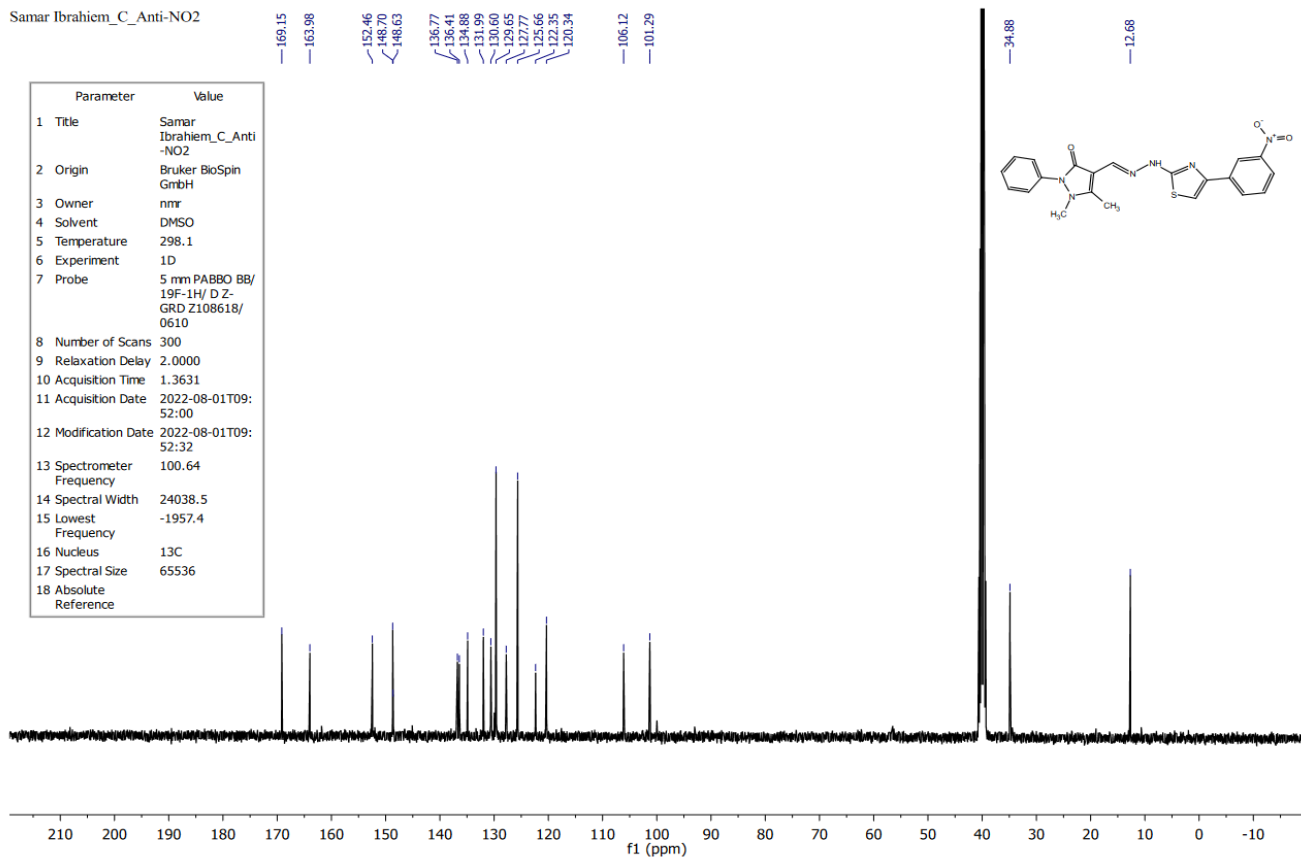

# Compound 3g

Rasha Ahmed\_H\_Anti-Br

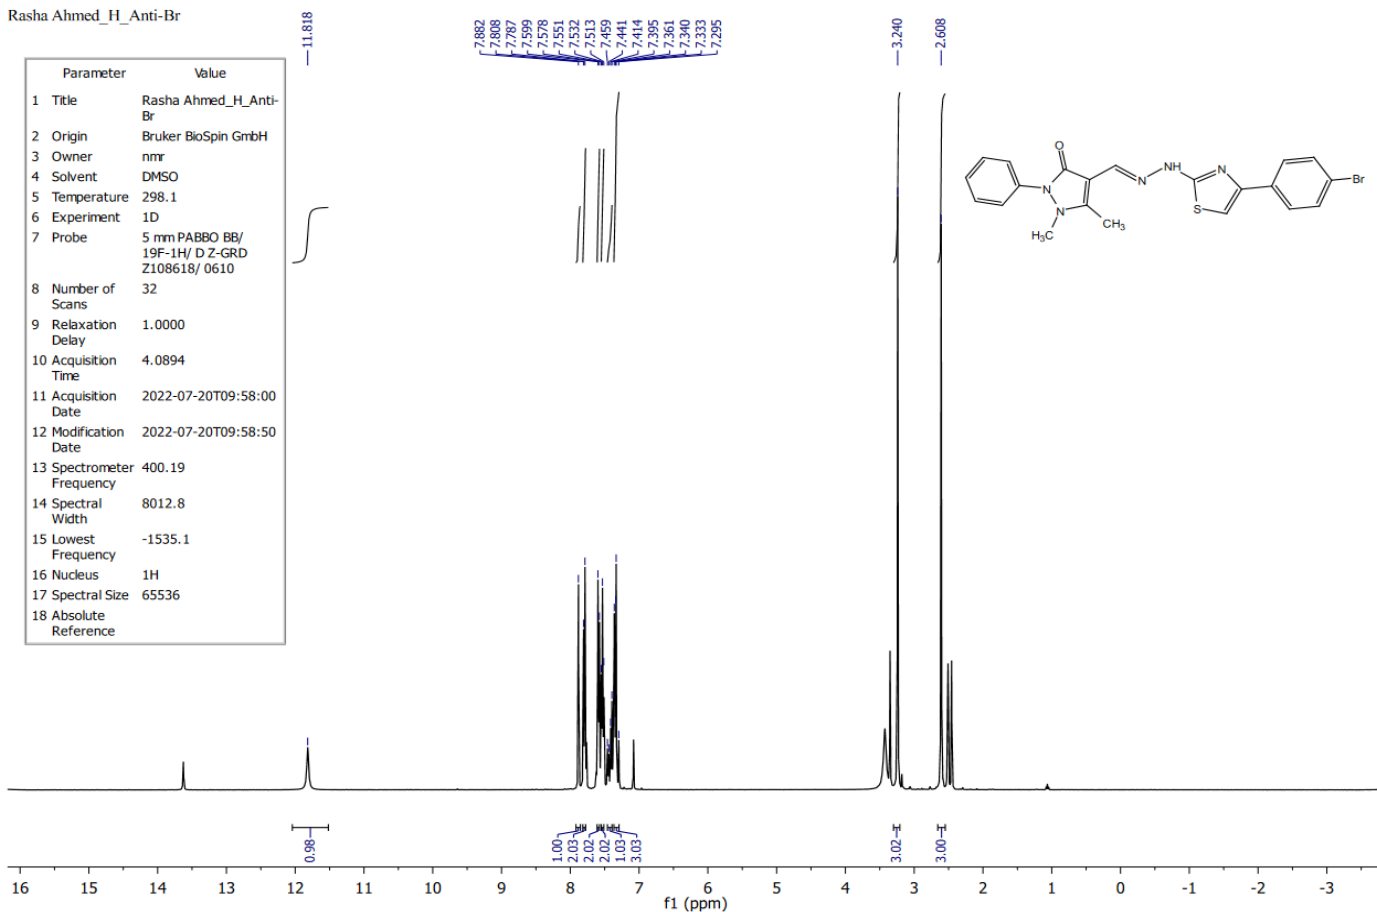

Rasha Ahmed\_C\_Anti-Br.10.fid

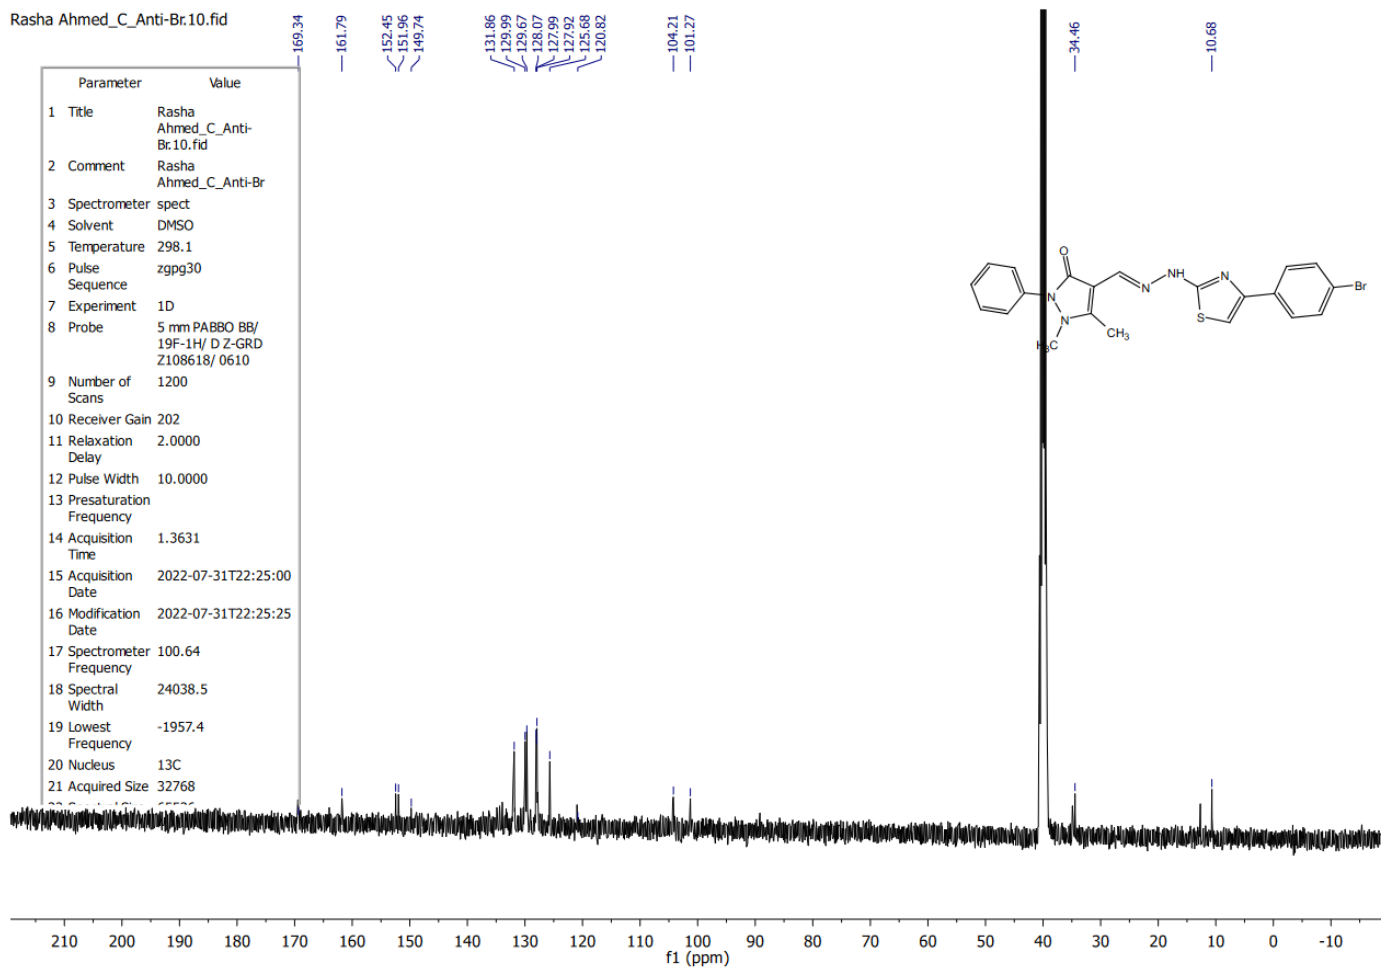

# Compound 3h

Rasha Ahmed\_H\_BA1-ph

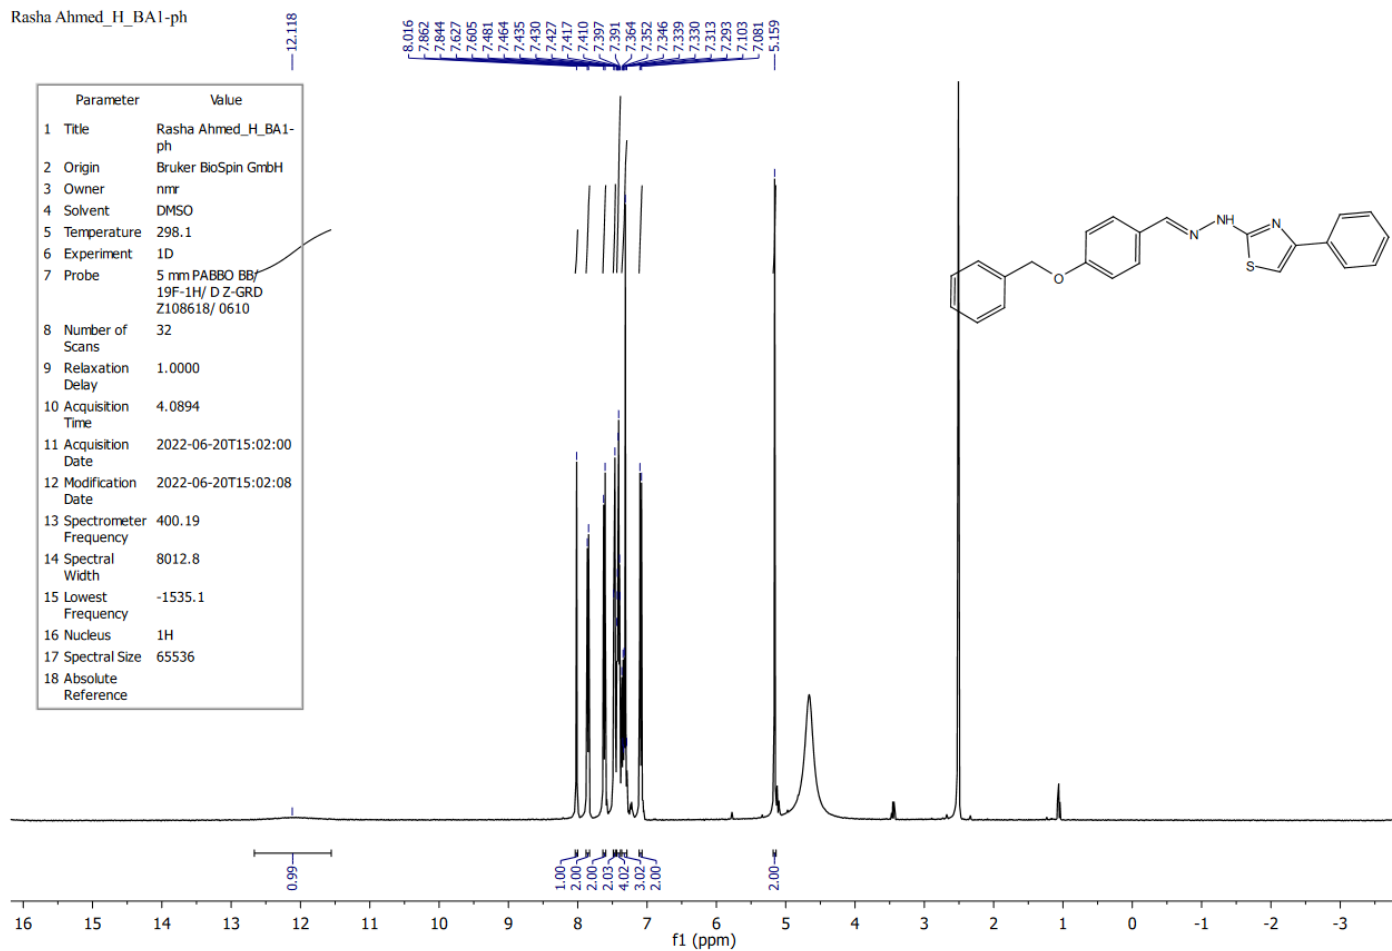

Rasha Ahmed\_C\_BA1-ph

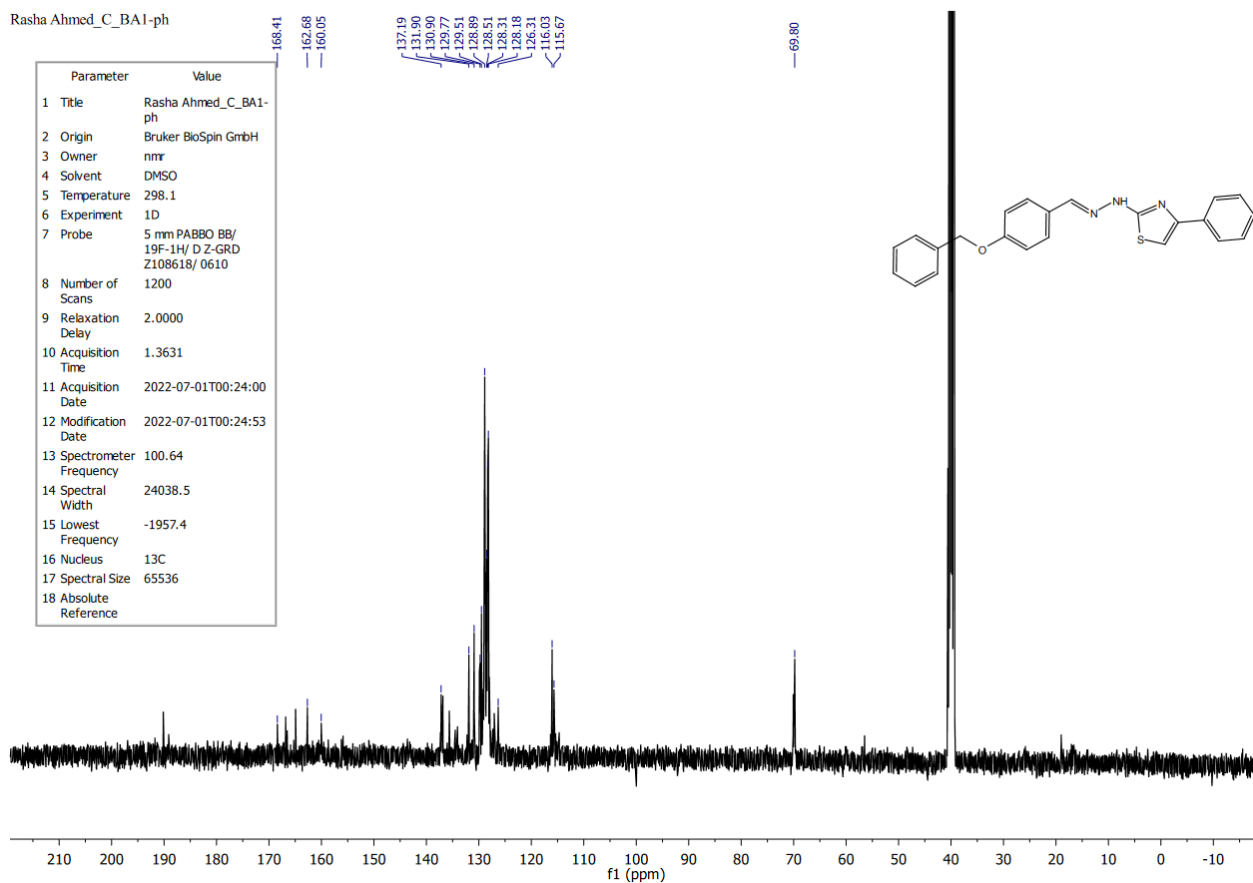

# Compound 3i

Yara Sayed\_H\_BA1-3NO2

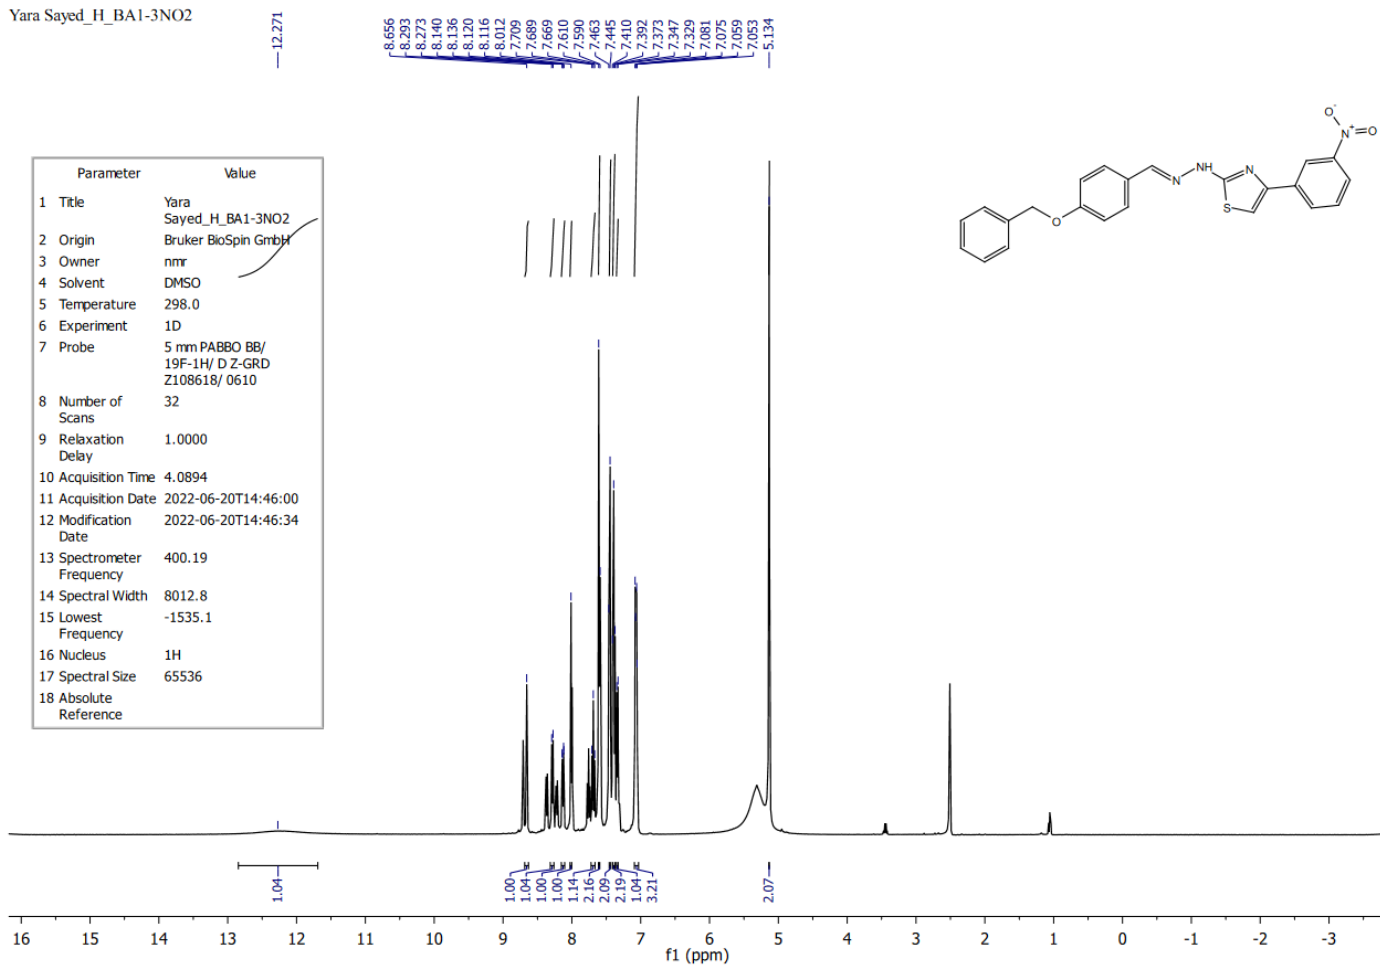

Yara Sayed\_C\_BA1-3NO2

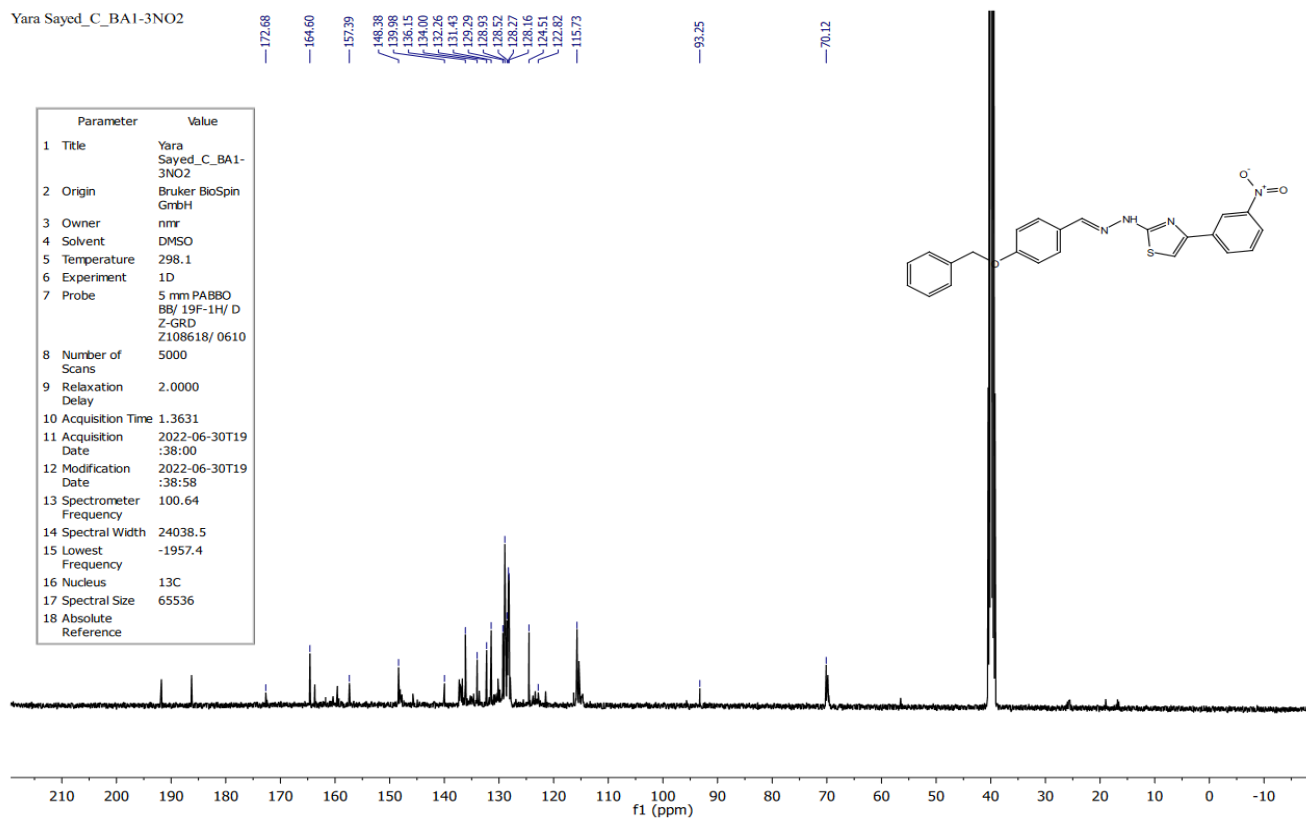

# Compound 3j

Yara Sayed\_H\_BA3-ph

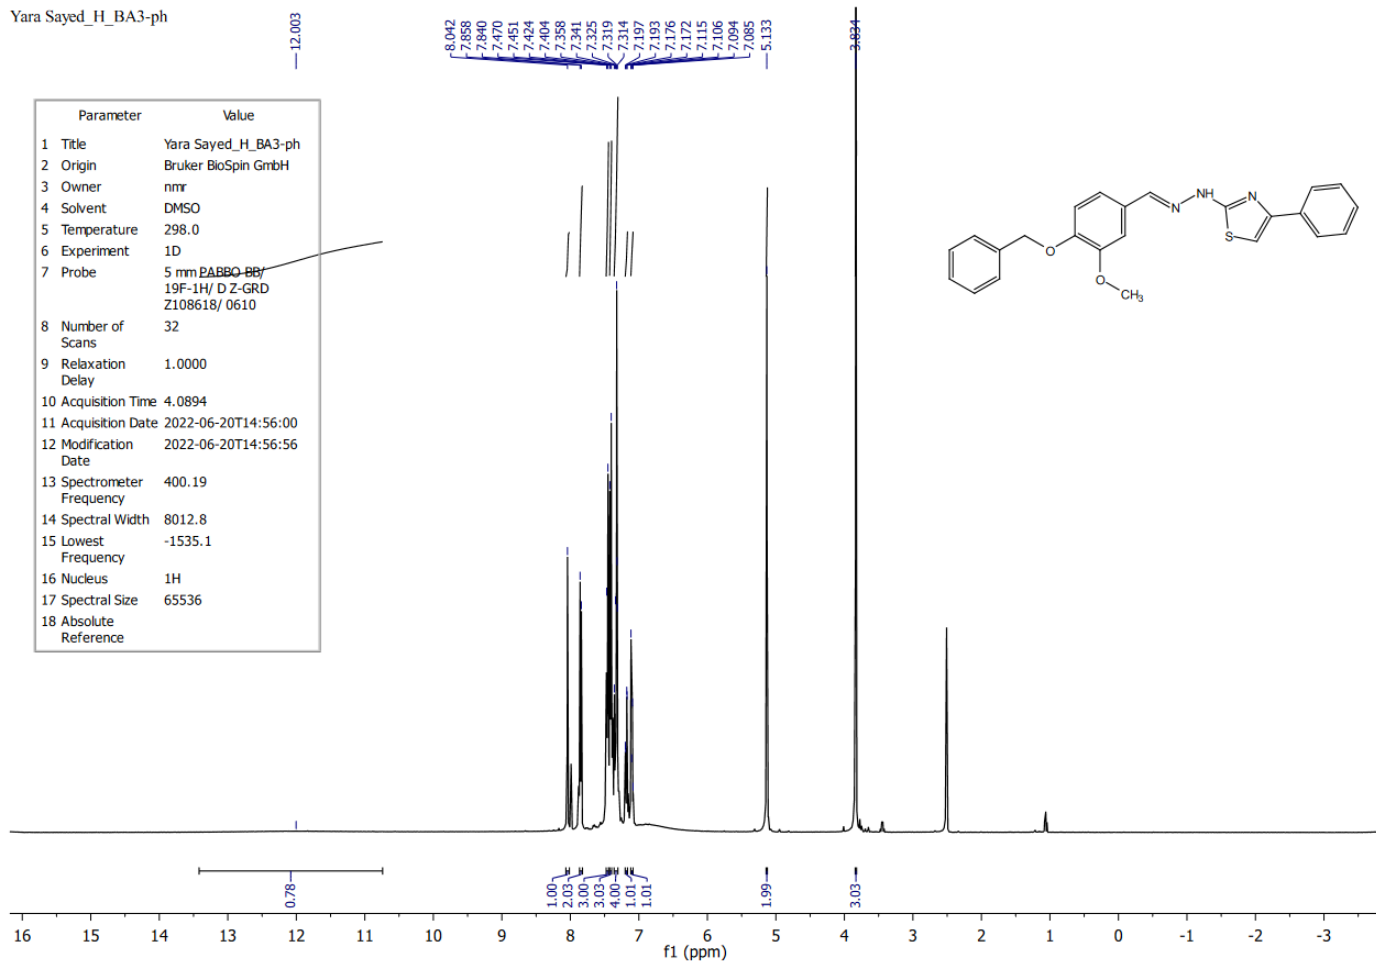

Yara Sayed\_C\_BA3-ph

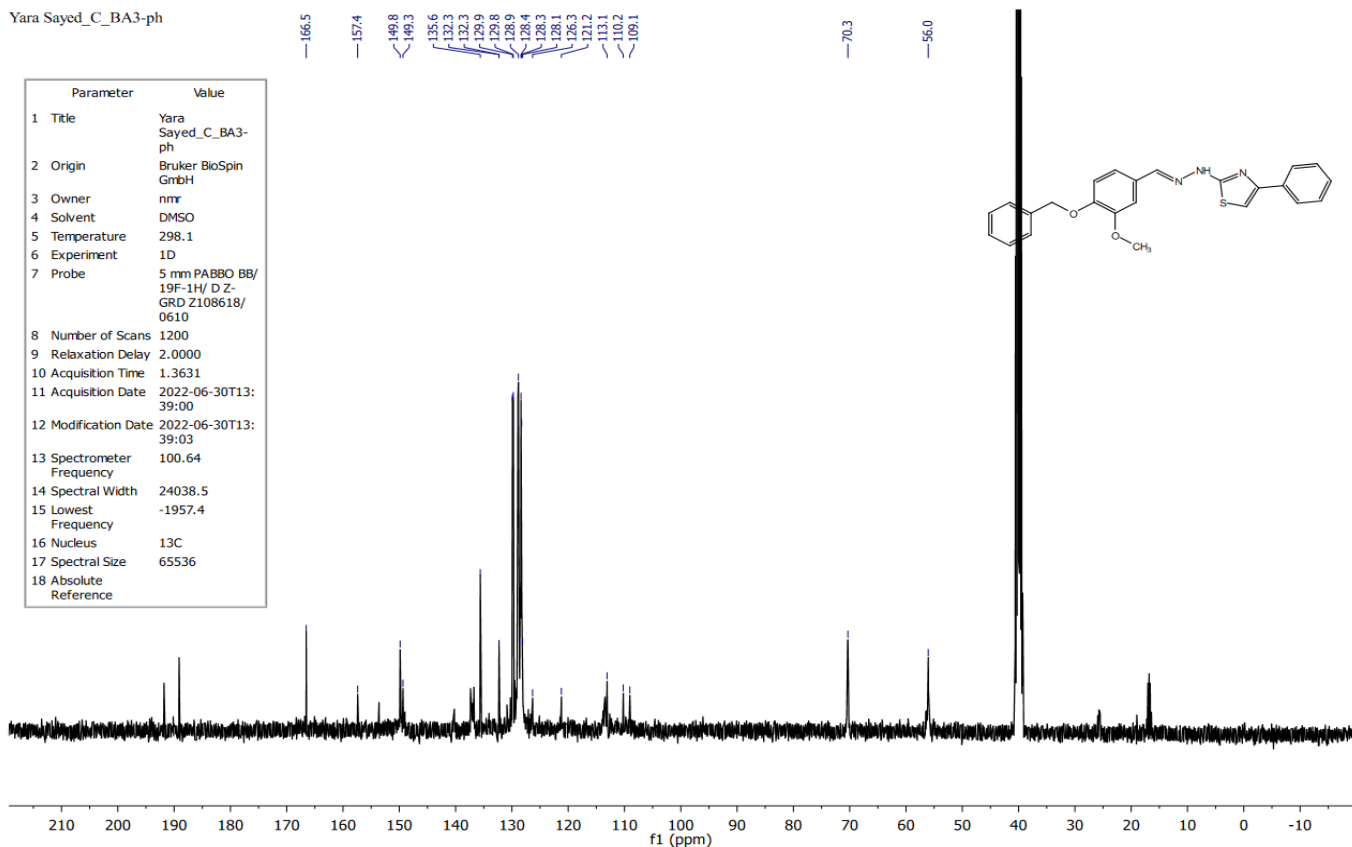

# Compound 3k

Rasha Ahmed\_H\_BA3-NO2

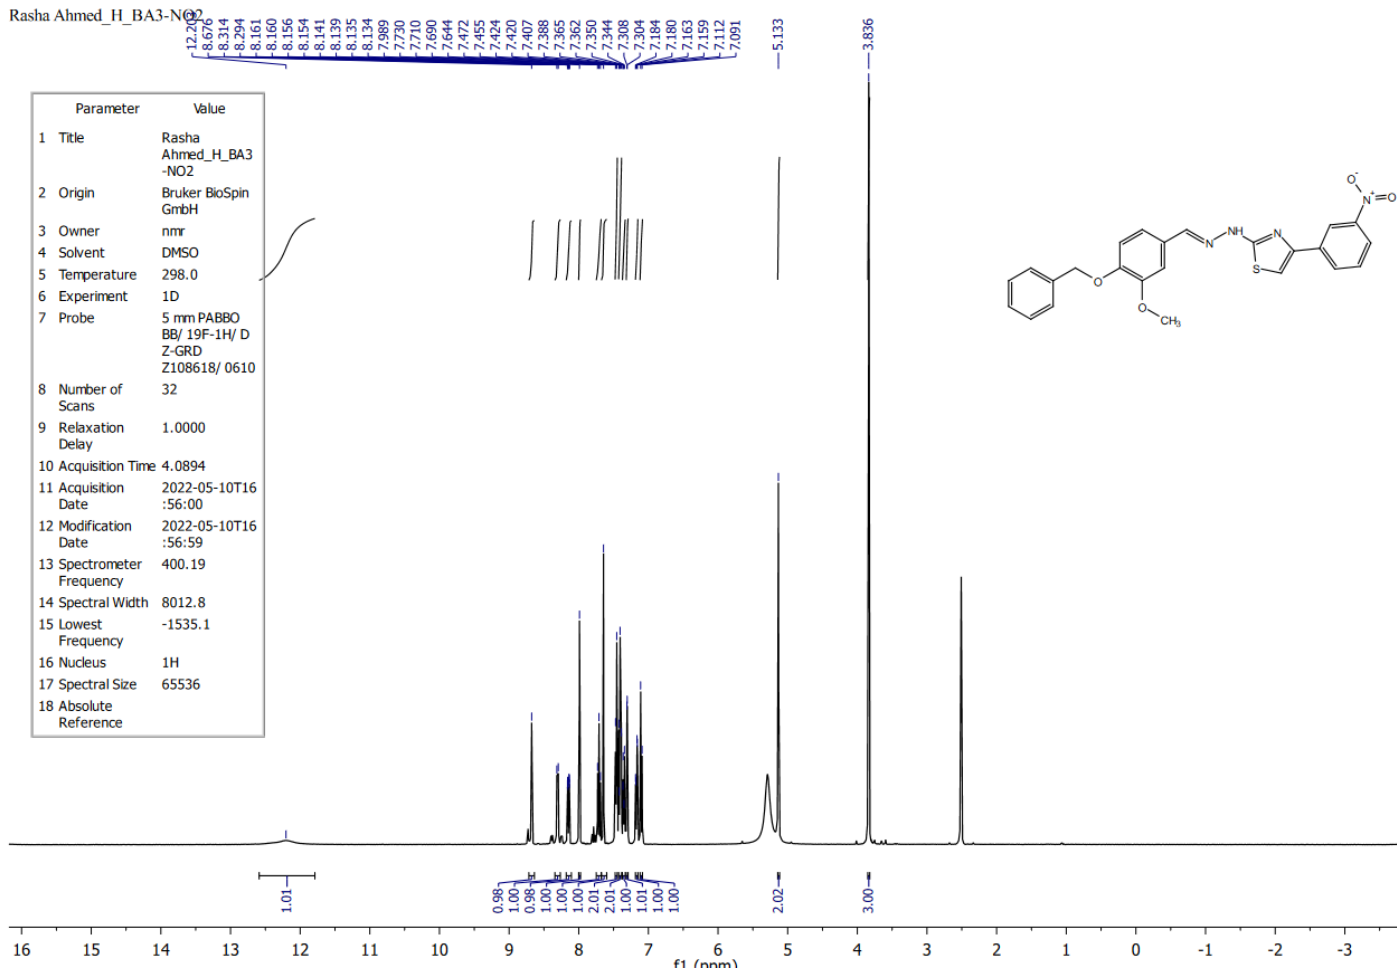

Rasha Ahmed\_C\_BA3-NO2

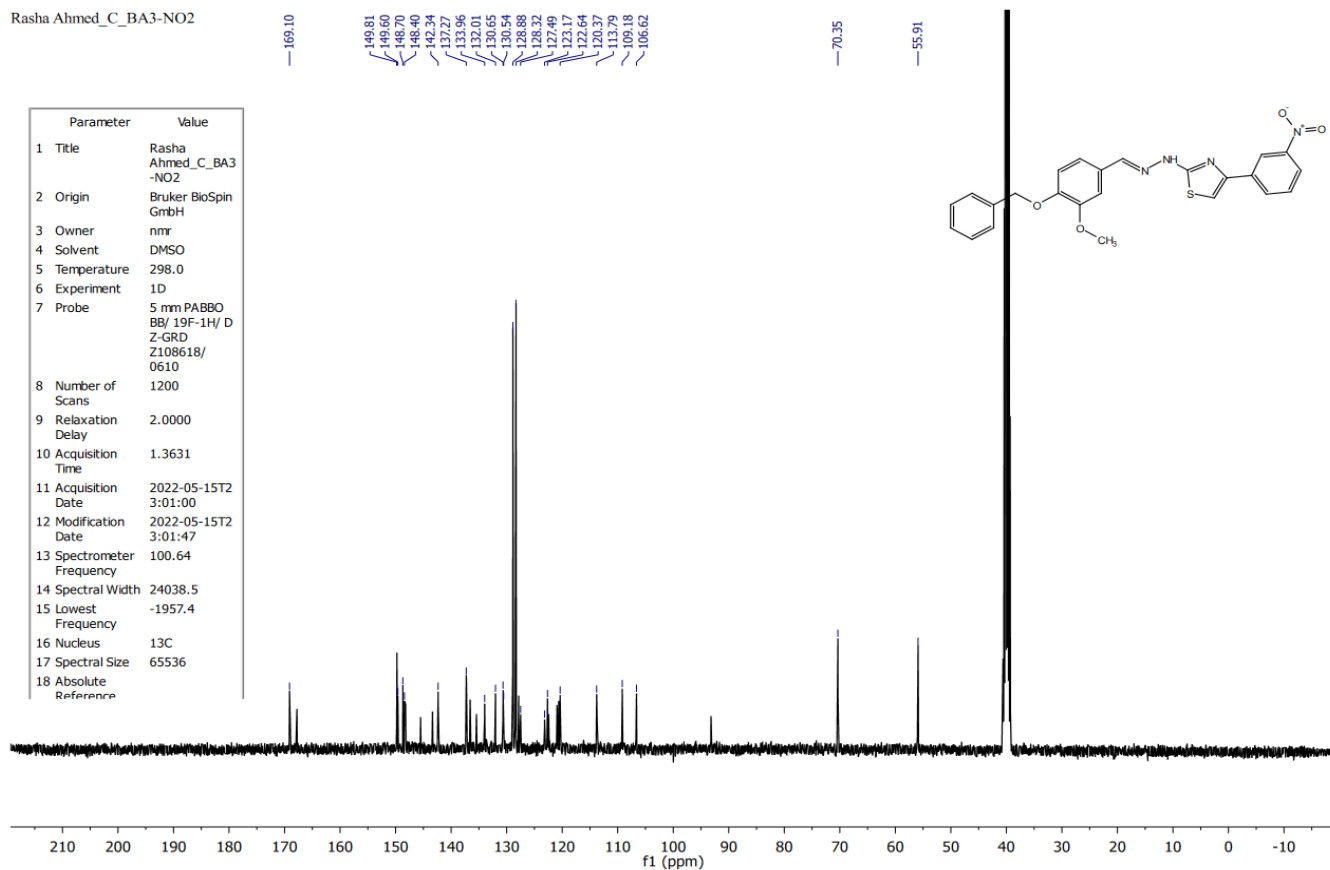

# Compound 3l

Yara Sayed\_H\_BA3-4Cl

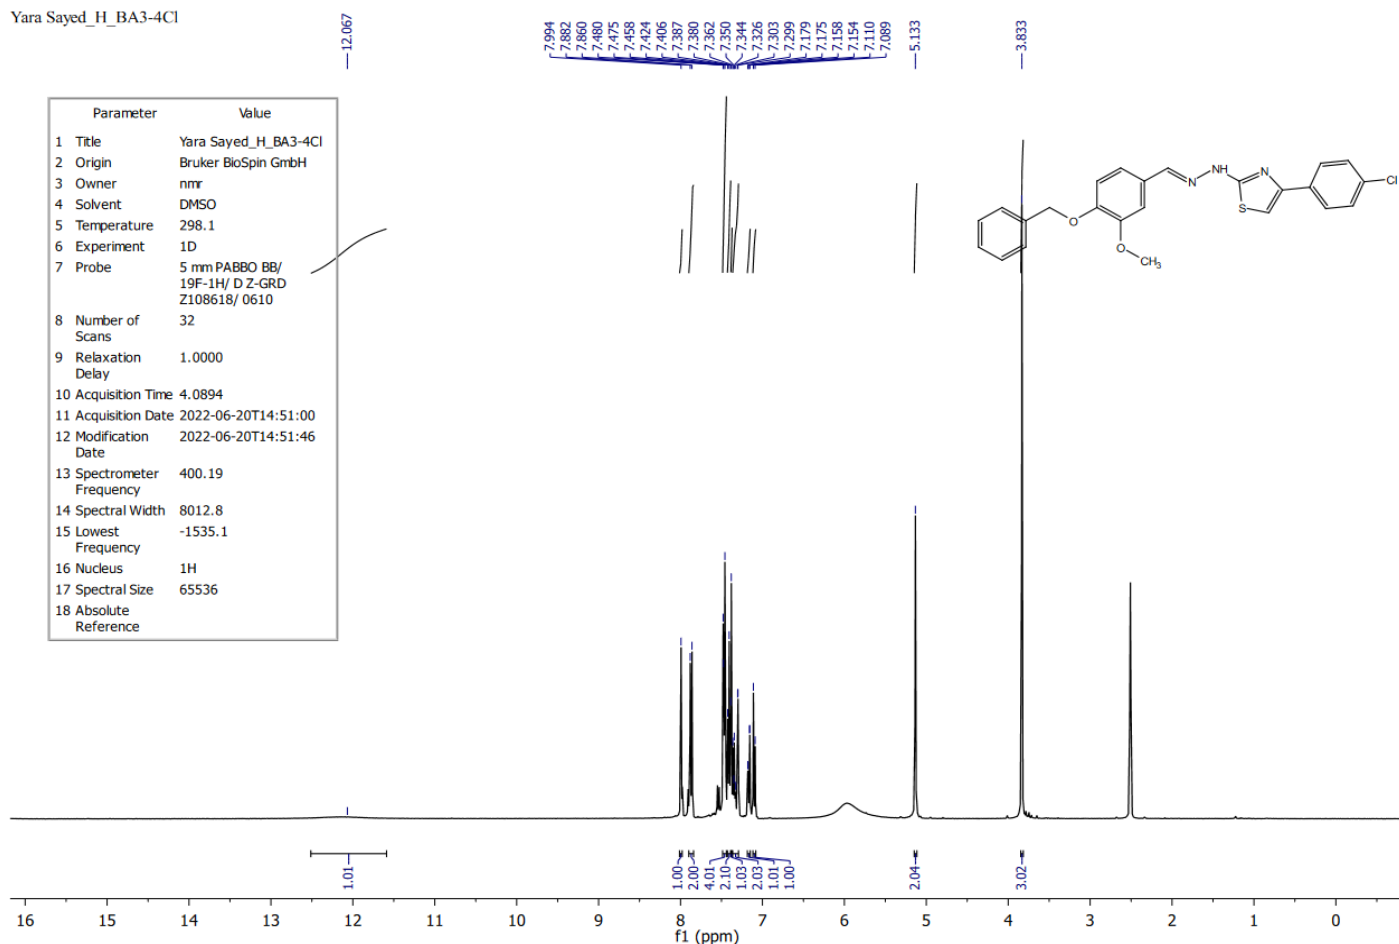

Yara Sayed\_C\_BA3-4Cl

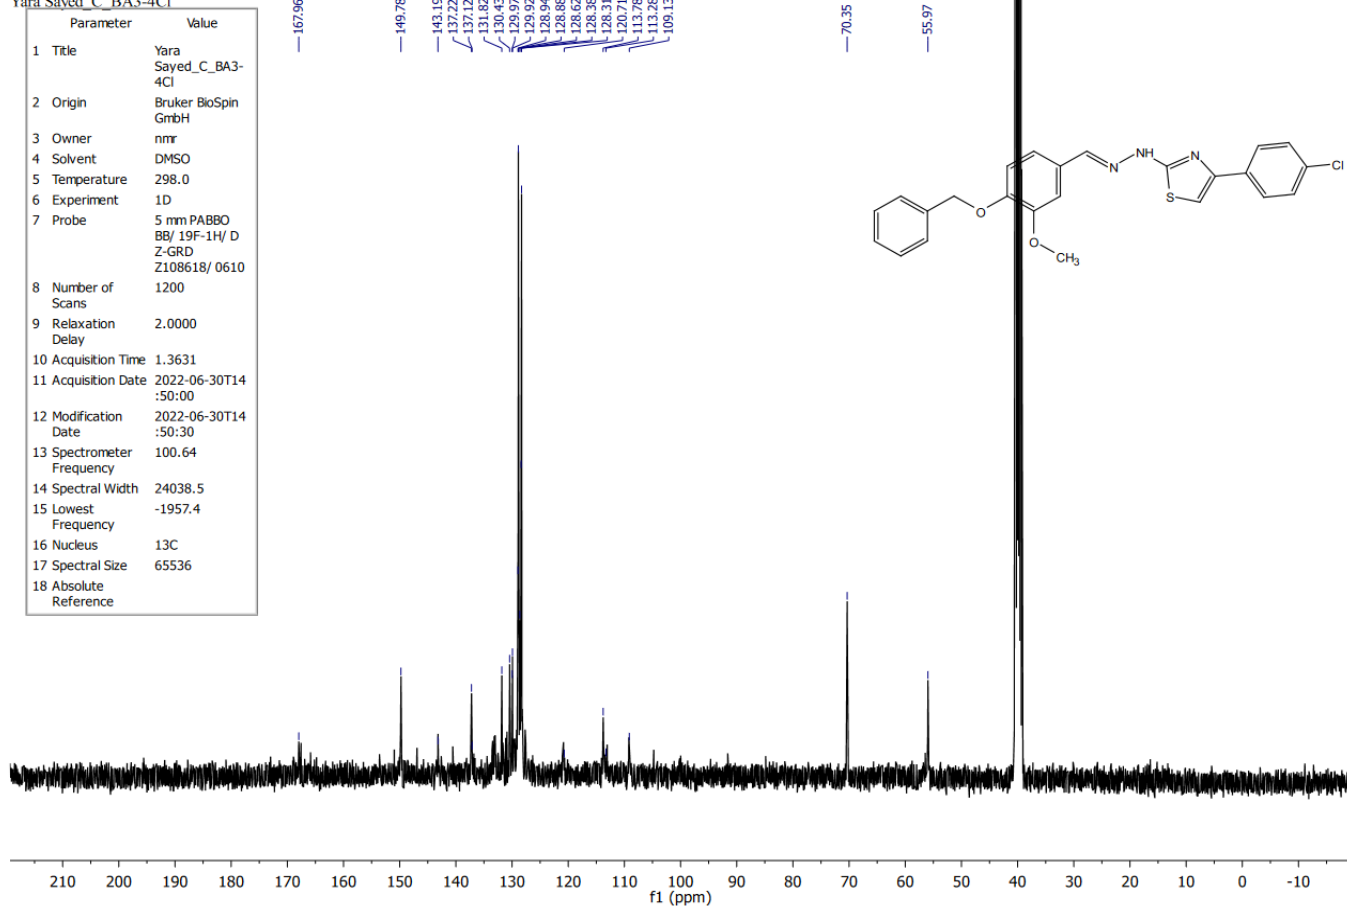



# Compound 3m

Samar Ibrahim\_H\_BA4-Ph

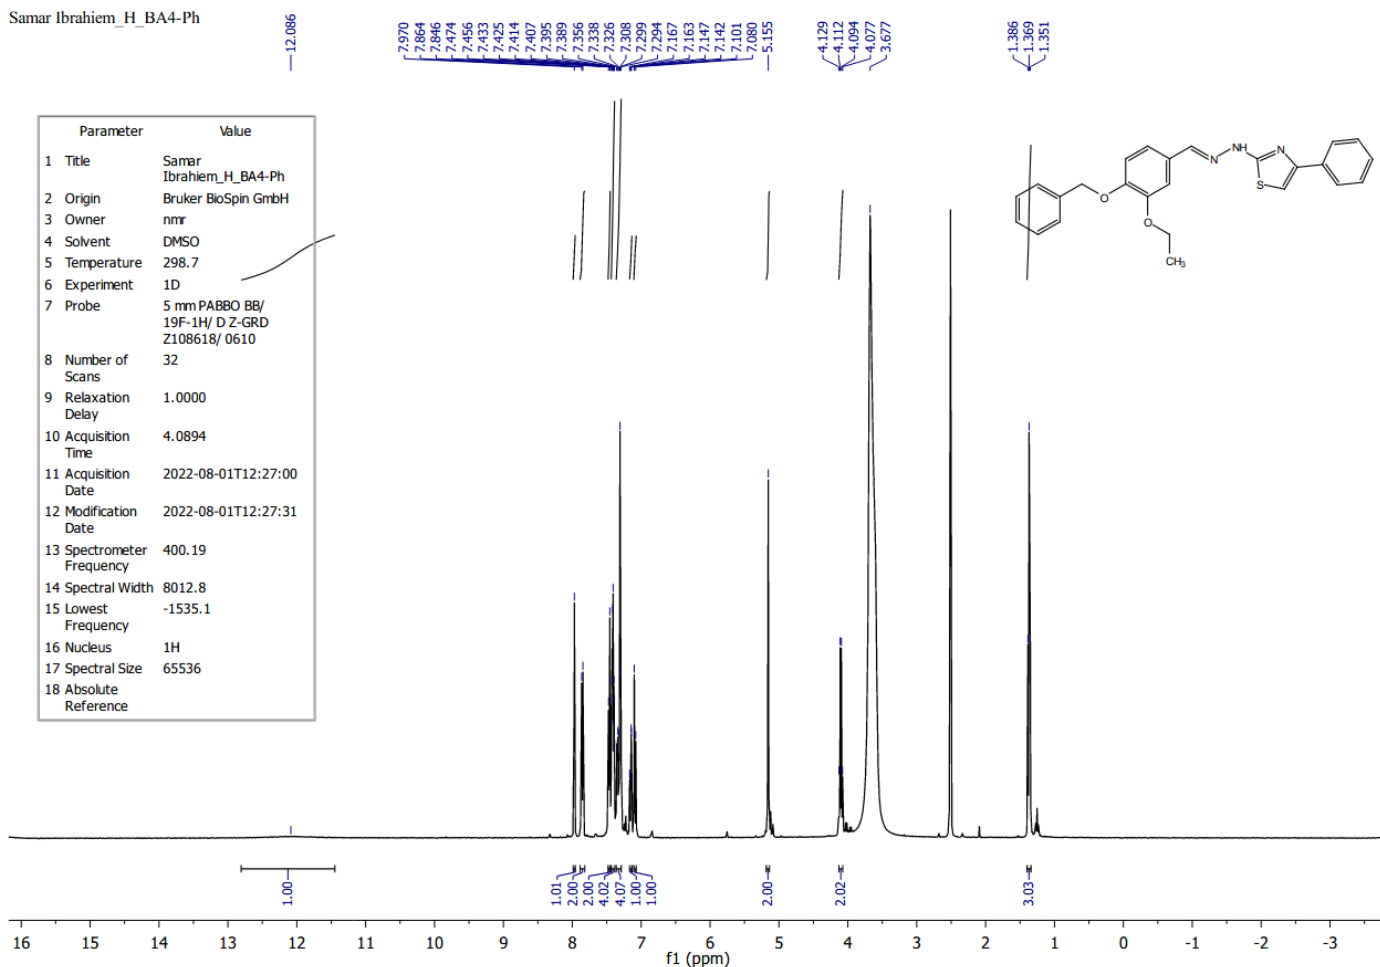

Samar Ibrahim\_C\_BA4-Ph.10.fid

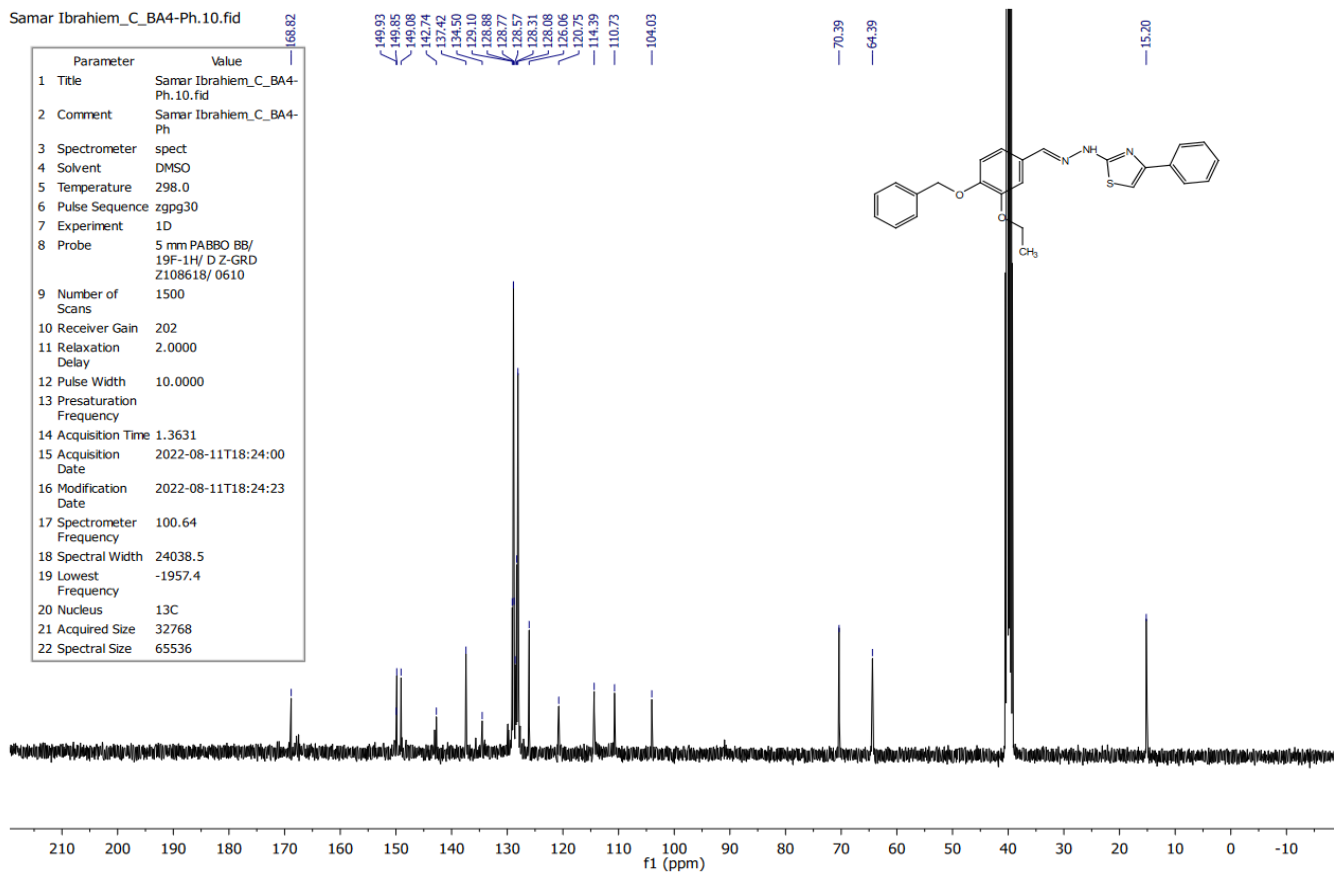

# Compound 3n

Yara Sayed\_H\_BA4-NO2

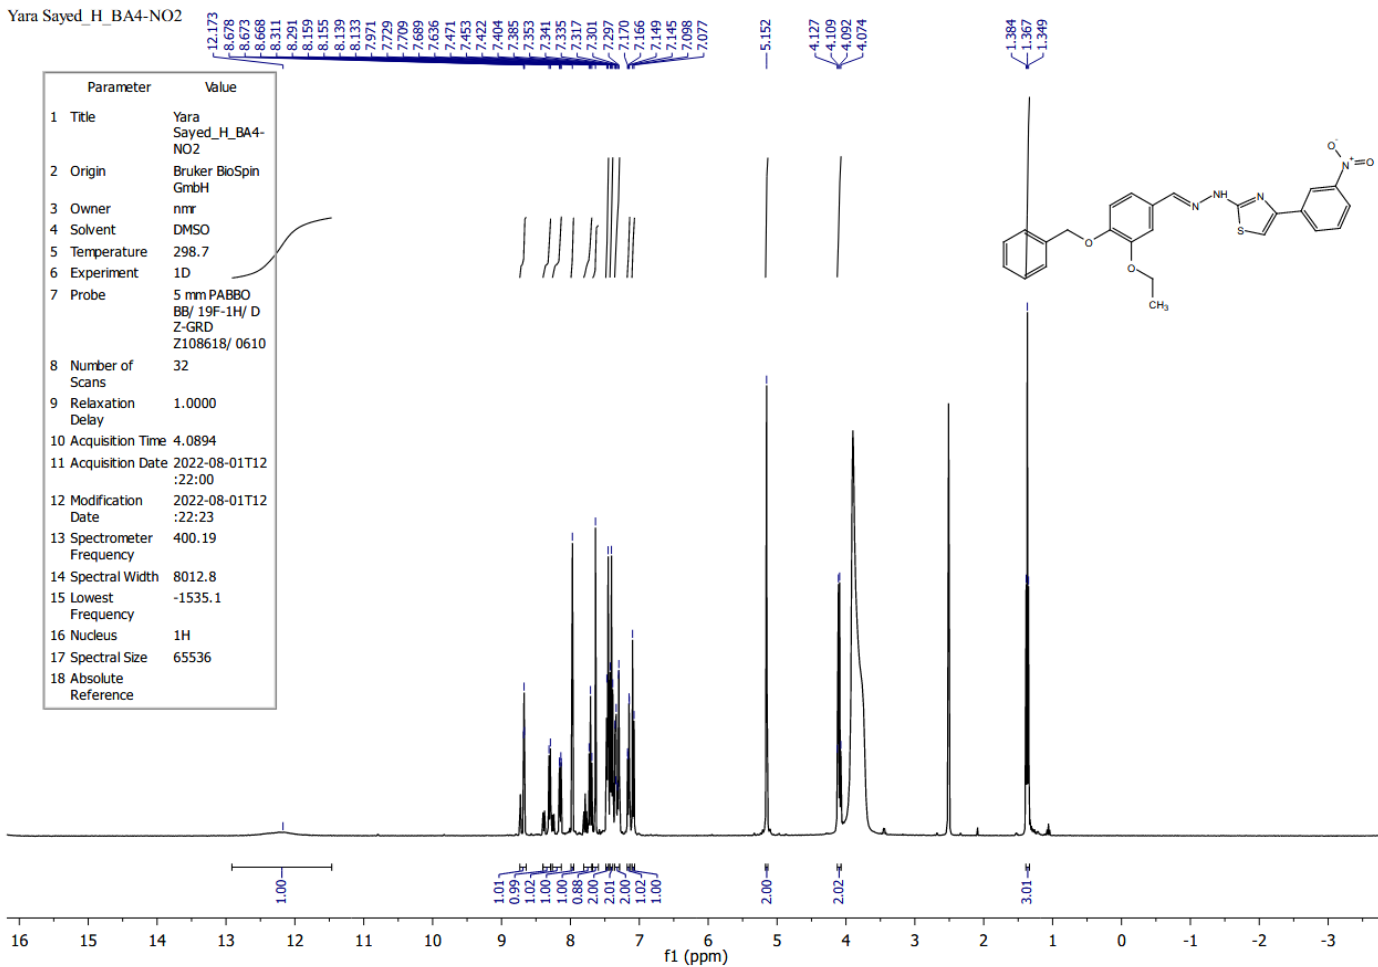

Yara Sayed\_C\_BA4-NO2.10.fid

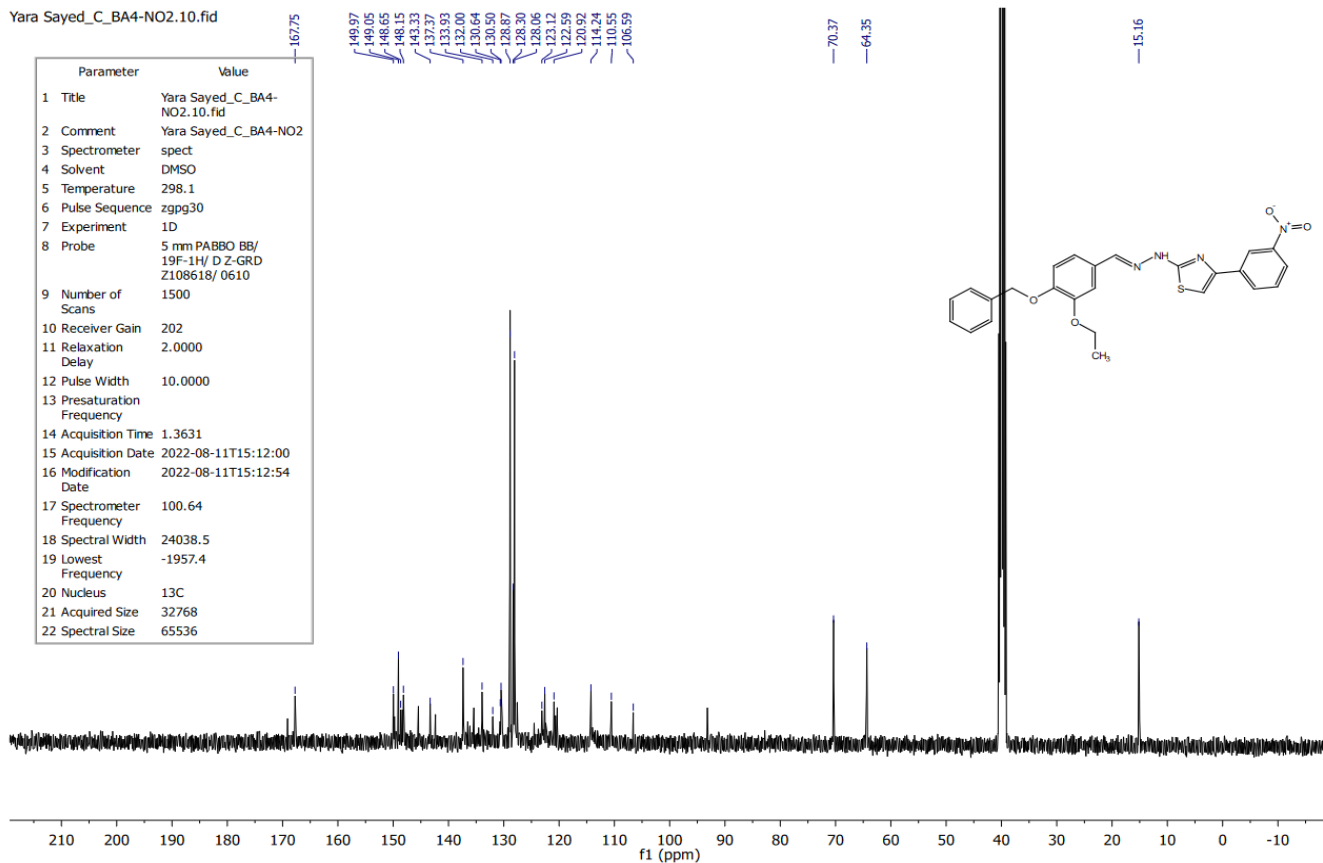

# Compound 3o

Rasha Ahmed\_H\_BA4-Cl

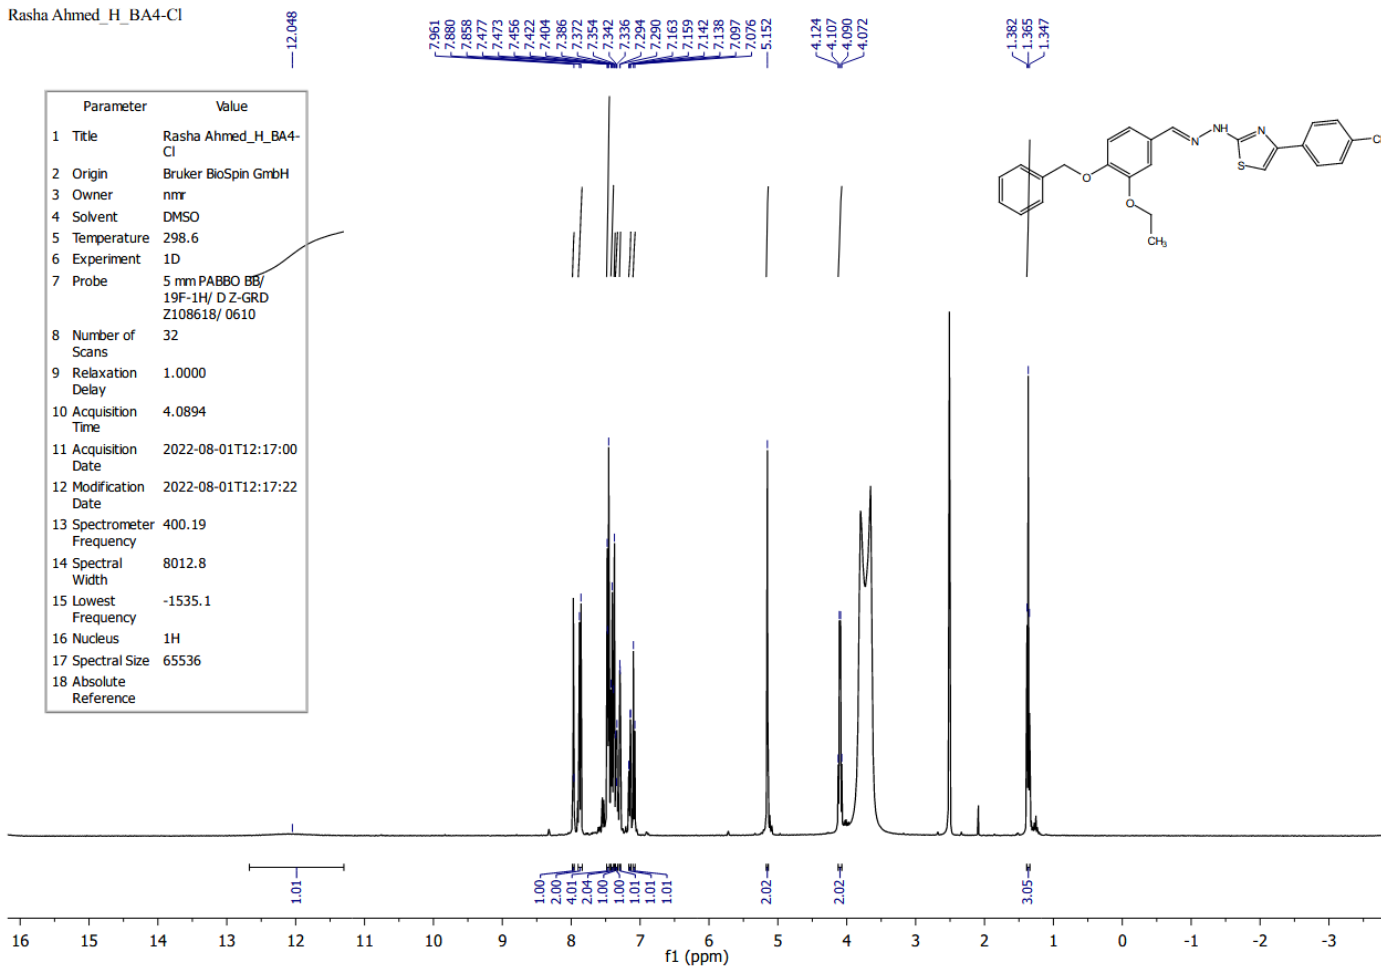

Rasha Ahmed\_C\_BA4-Cl.10.fid

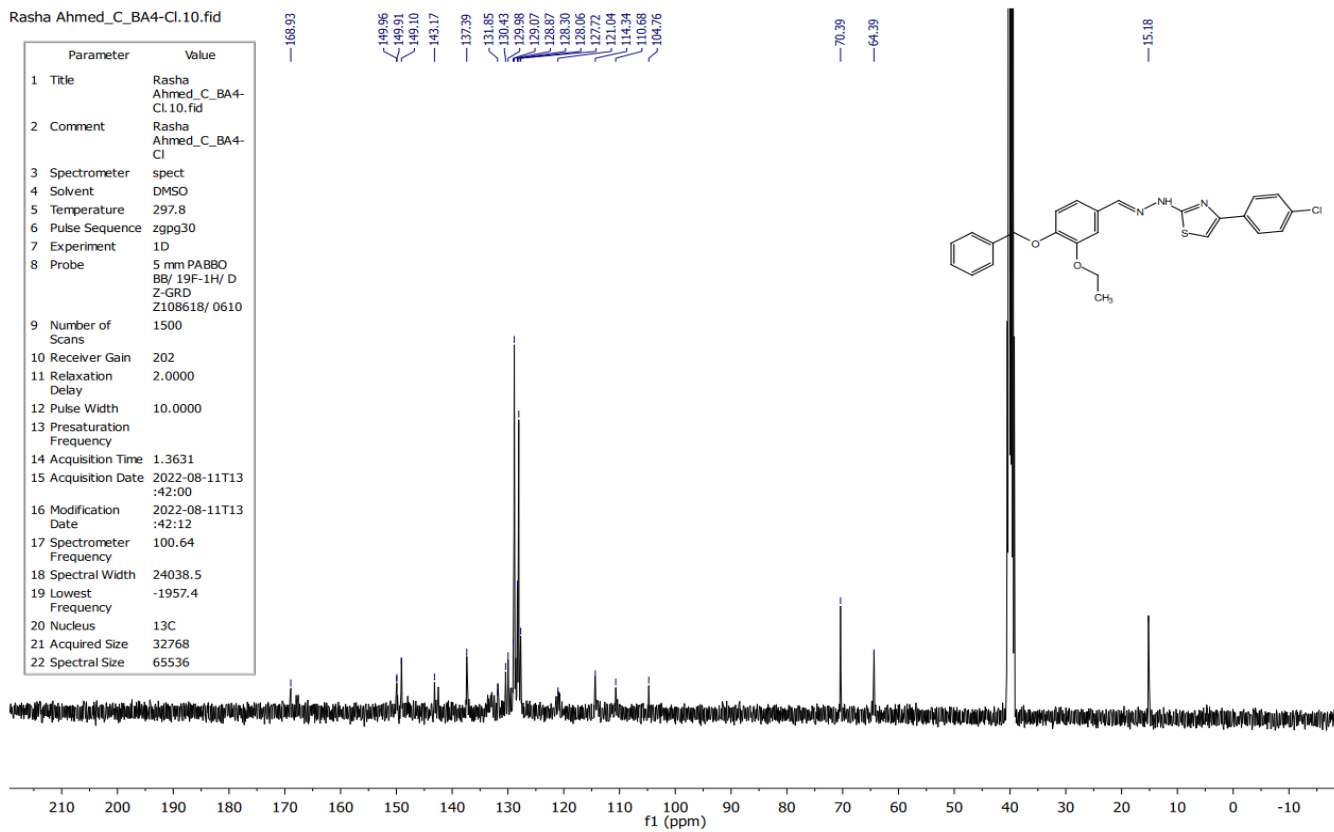

# Compound 3p

Rasha Ahmed\_H\_BA4-Br

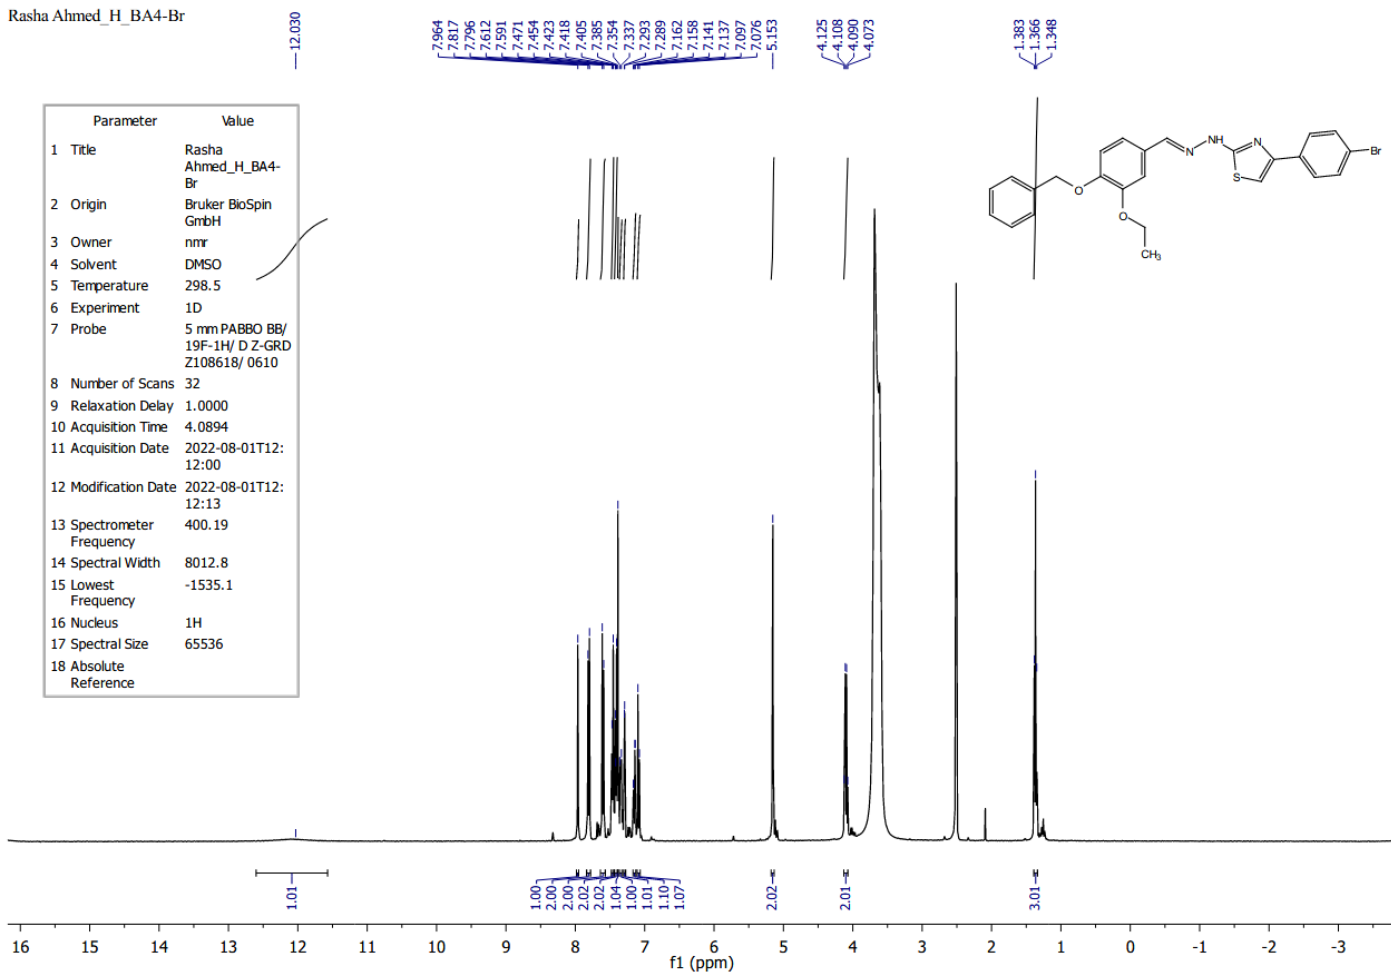

Rasha Ahmed\_C\_BA4-Br.10.fid(br)

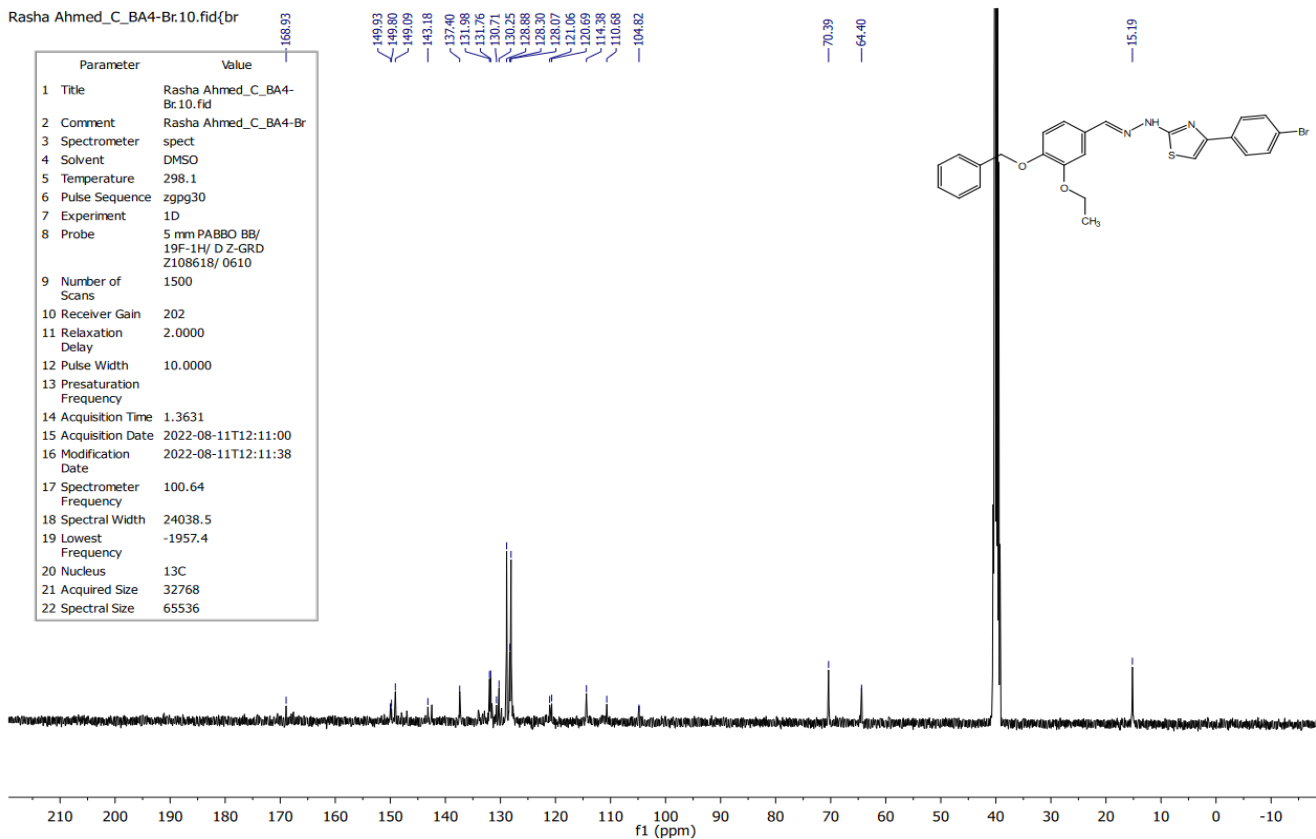

## Elemental analysis

# Al-Azhar University The Regional Center for Mycology and Biotechnology

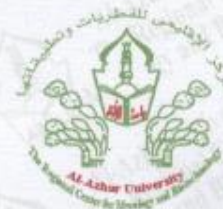

### Requester Data:

**Name:** Dr Rasha Hasan

**Authority:** Faculty of Pharmacy, Cairo University

### Sample Data:

Sixteen samples had been submitted for elemental analysis.

### Analysis Report:

| Sample Code                           | C%    | H%   | N%    |
|---------------------------------------|-------|------|-------|
| 3g Anti Br                            | 54.09 | 4.03 | 15.17 |
| 3f Anti NO <sub>2</sub>               | 58.31 | 4.32 | 19.62 |
| 3i BA <sub>1</sub> NO <sub>2</sub>    | 64.40 | 4.35 | 13.29 |
| 3h BA <sub>1</sub> Ph                 | 71.92 | 4.84 | 11.16 |
| 3k BA <sub>3</sub> 3NO <sub>2</sub>   | 62.43 | 4.51 | 12.43 |
| 3l BA <sub>3</sub> 4Cl                | 63.98 | 4.59 | 9.52  |
| 3j BA <sub>3</sub> Ph                 | 69.09 | 5.21 | 10.34 |
| 3n BA <sub>4</sub> 3NO <sub>2</sub>   | 63.45 | 4.72 | 12.07 |
| 3p BA <sub>4</sub> Br                 | 59.28 | 4.50 | 8.49  |
| 3o BA <sub>4</sub> Cl                 | 64.59 | 4.87 | 9.29  |
| 3m BA <sub>4</sub> Ph                 | 70.06 | 5.63 | 10.02 |
| 3d ClNO <sub>2</sub> 3NO <sub>2</sub> | 47.82 | 2.67 | 17.52 |
| 3e ClNO <sub>2</sub> 4Cl              | 49.05 | 2.71 | 14.53 |
| 3c ClNO <sub>2</sub> Ph               | 53.80 | 3.27 | 15.89 |
| 3b Ethoxy NO <sub>2</sub>             | 56.41 | 4.39 | 14.81 |
| 3a Ethoxy Ph                          | 63.91 | 5.22 | 12.59 |

INVESTIGATOR

DIRECTOR
